# Supplementary material for: Associations between picocyanobacterial ecotypes and cyanophage host genes across ocean basins and depth
Source: PeerJ journal article supplement (doi:10.7717/peerj.14924), 2023-02-28
Supplement: Supplemental_Data_Trees4.pdf [file Supplemental_Data_Trees4.pdf]

**Supplemental Data for  
Associations between picocyanobacterial ecotypes and cyanophage host genes  
across ocean basins**

**Clara A. Fuchsman, David Garcia-Prieto, Matthew D. Hays, Jacob A. Cram**

**Supplemental Data contains the phylogenetic trees created in this paper. For each tree, bootstraps can be found over the nodes. Bootstraps are between 0-1 and those below 0.50 are not shown. References shown in green are isolates, and sequences shown in blue have been verified to be myo-cyanophage. Most blue sequences were verified in Fuchsman et al (2021).**

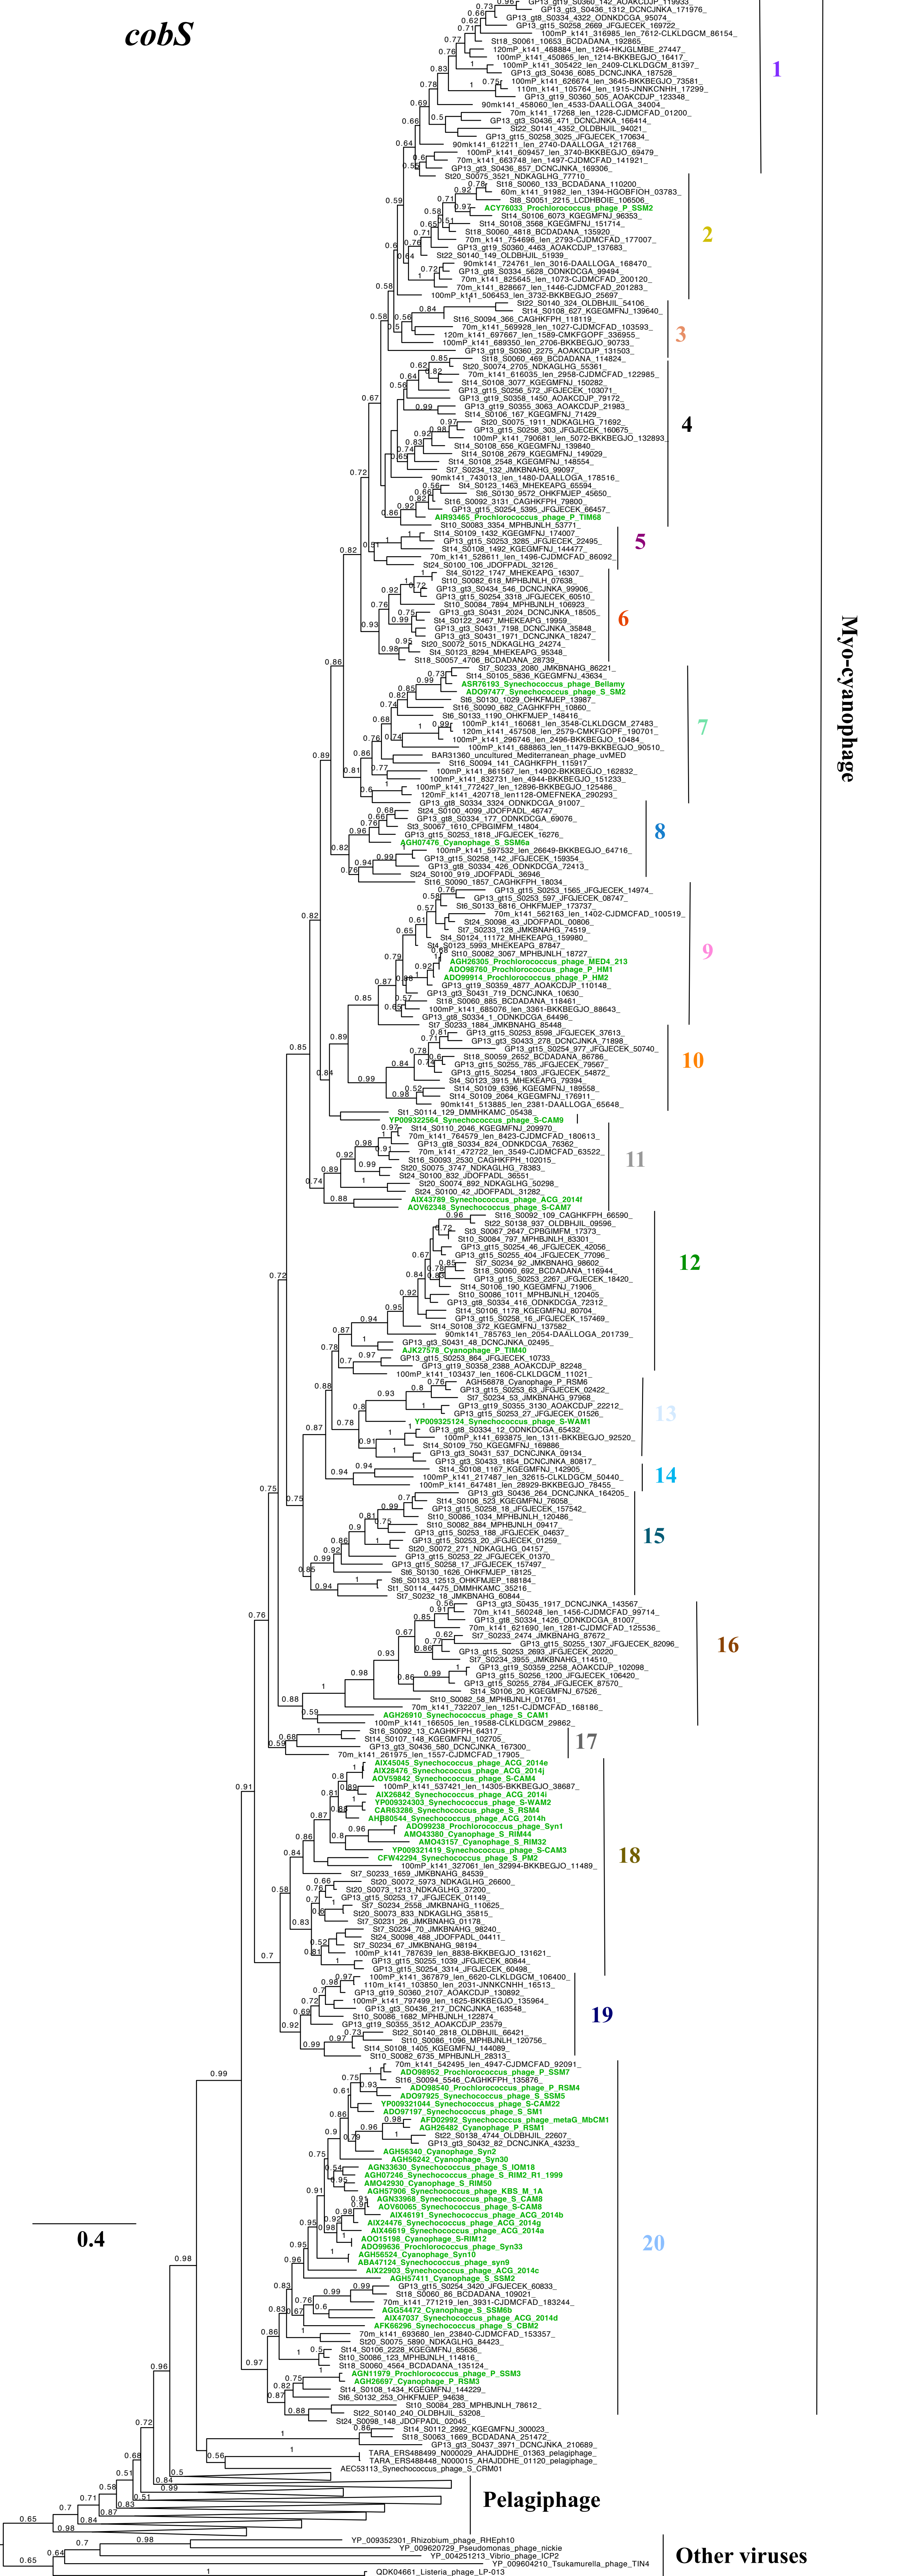



# Assimilatory nitrite reductase (*nirA*)

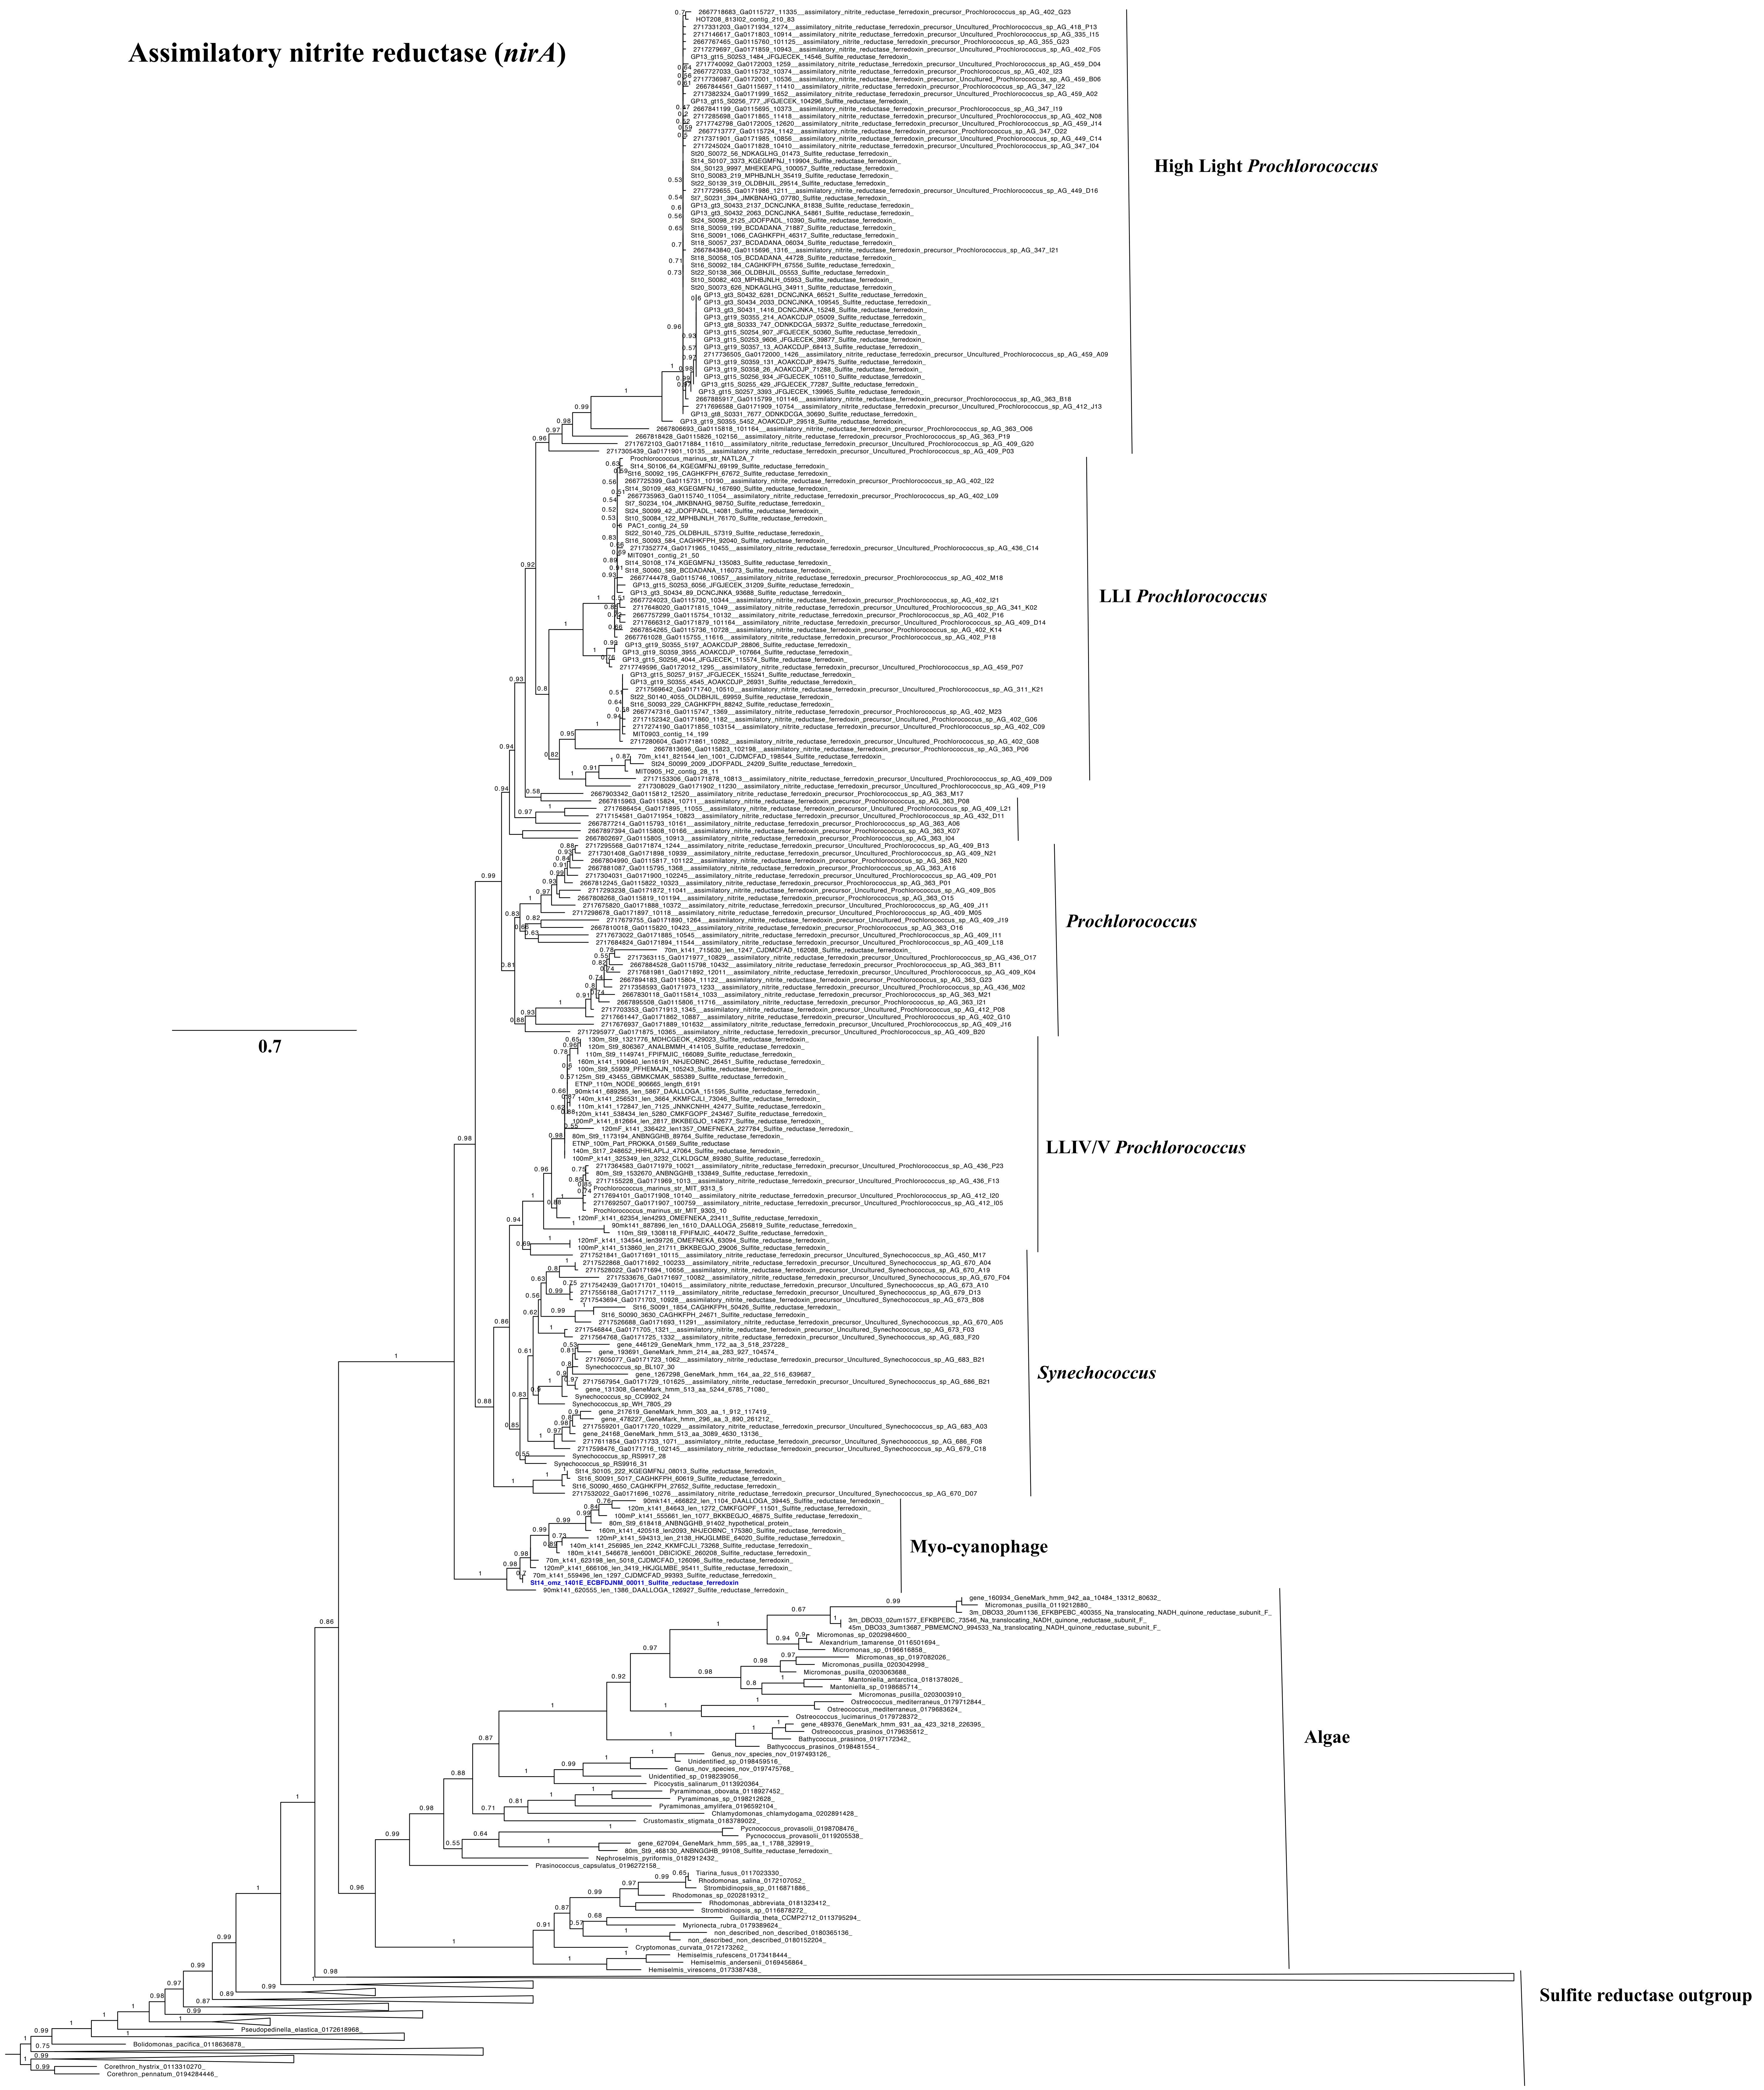



# Nitrite transporter (*nirC*)

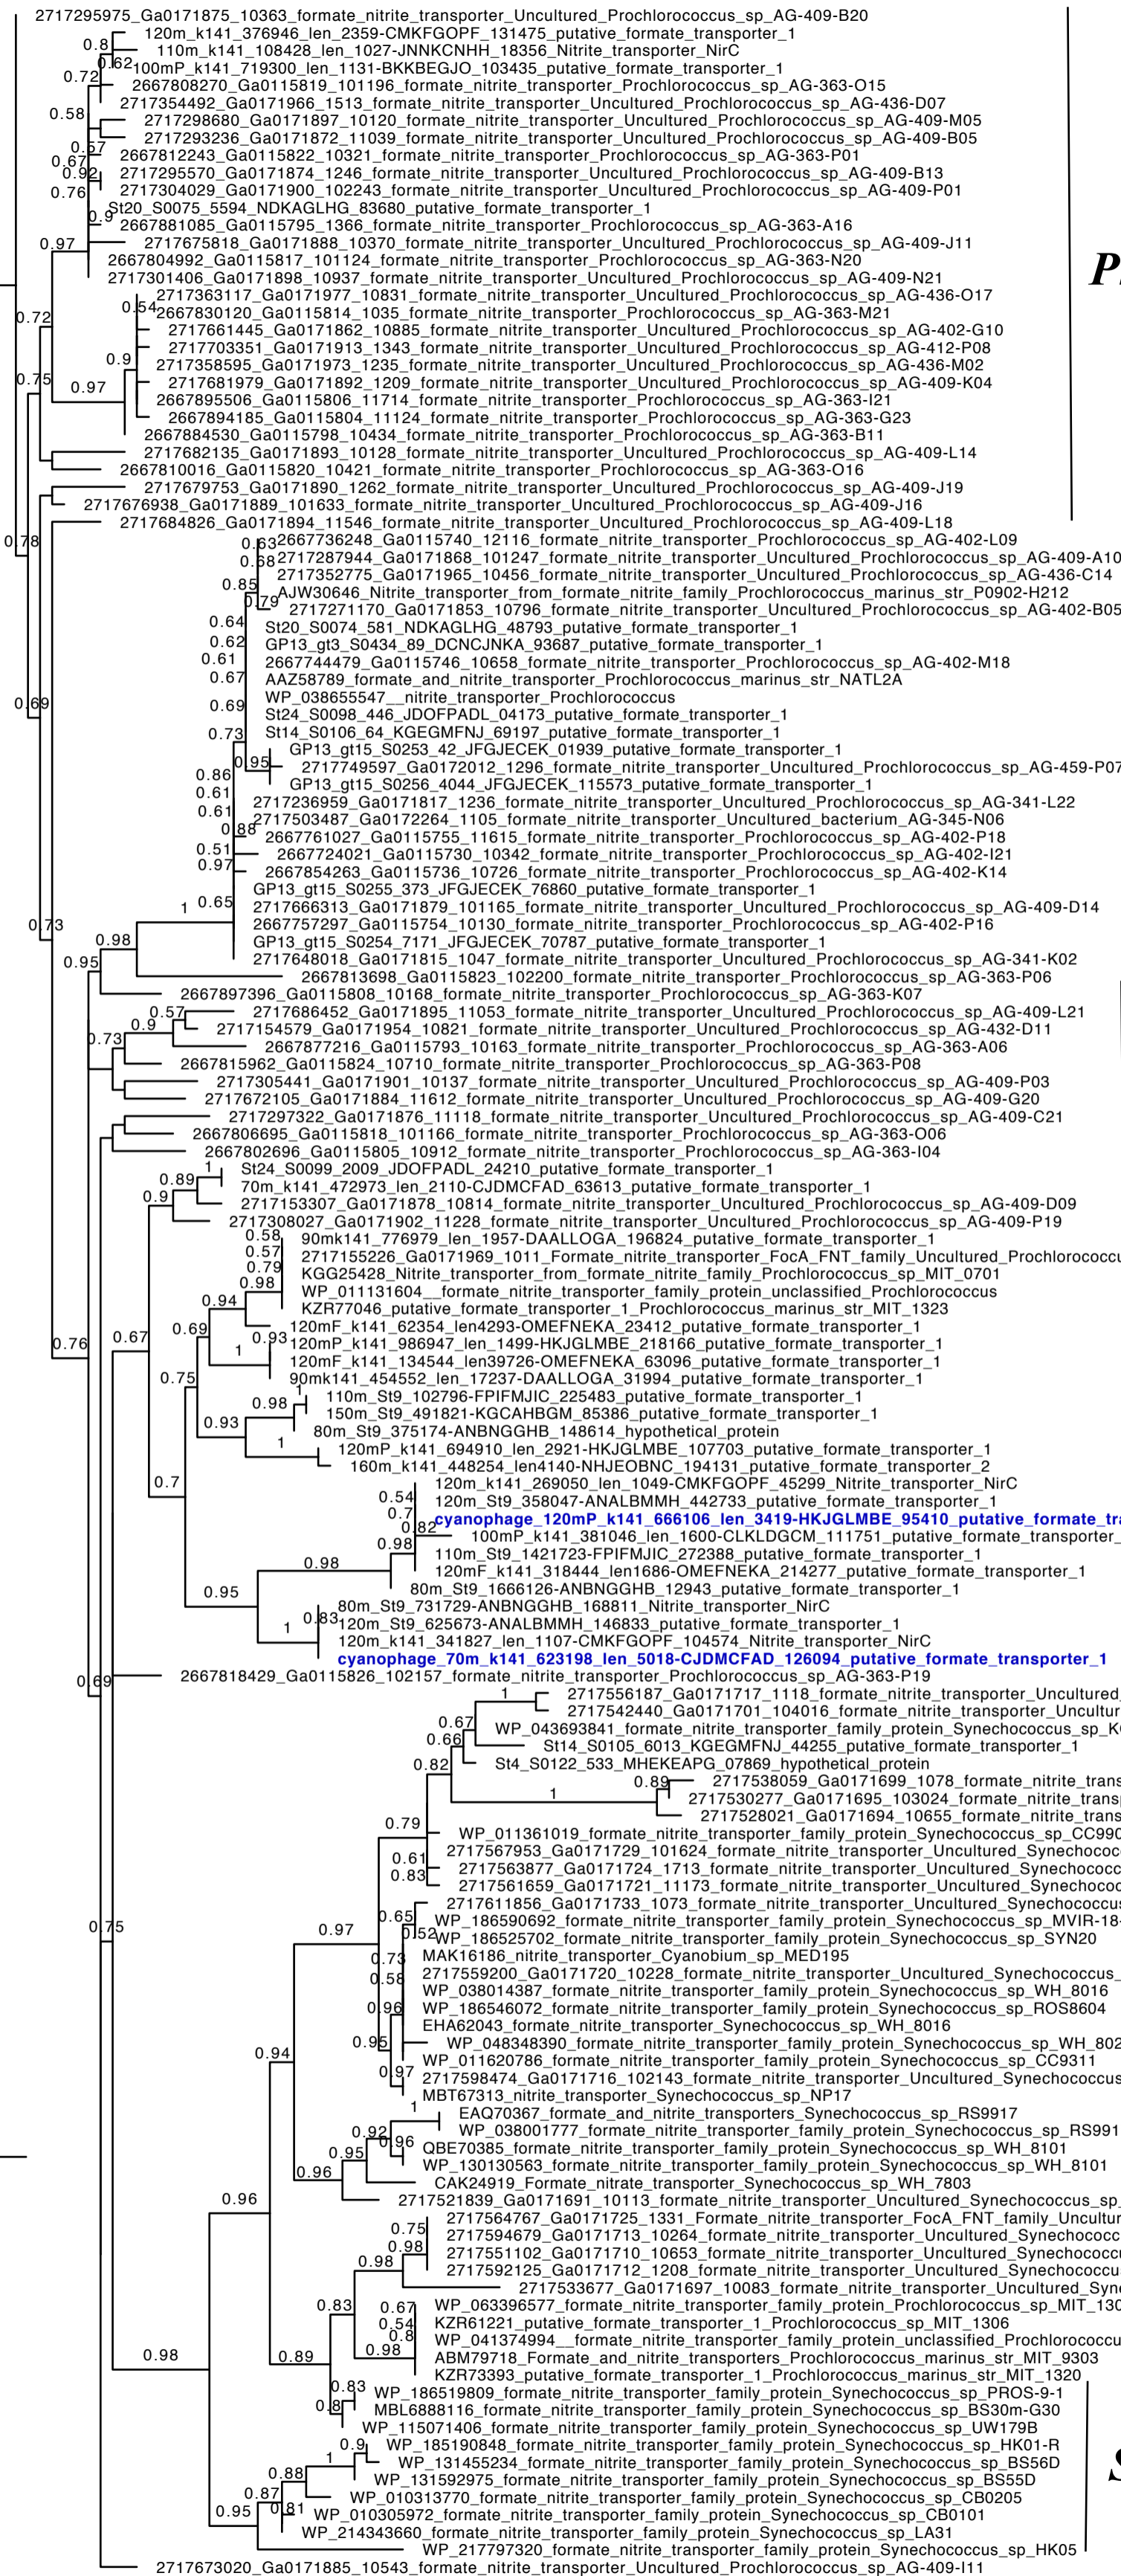

## Prochlorococcus

## LLI Prochlorococcus

## Prochlorococcus

## LLIV/V Prochlorococcus

## Myo-cyanophage

## Synechococcus

## LLIV Prochlorococcus

## Synechococcus

## Outgroup

0.2

1

1

1

0.56

1



# Phosphate binding subunit phosphate transporter (*psrS*)

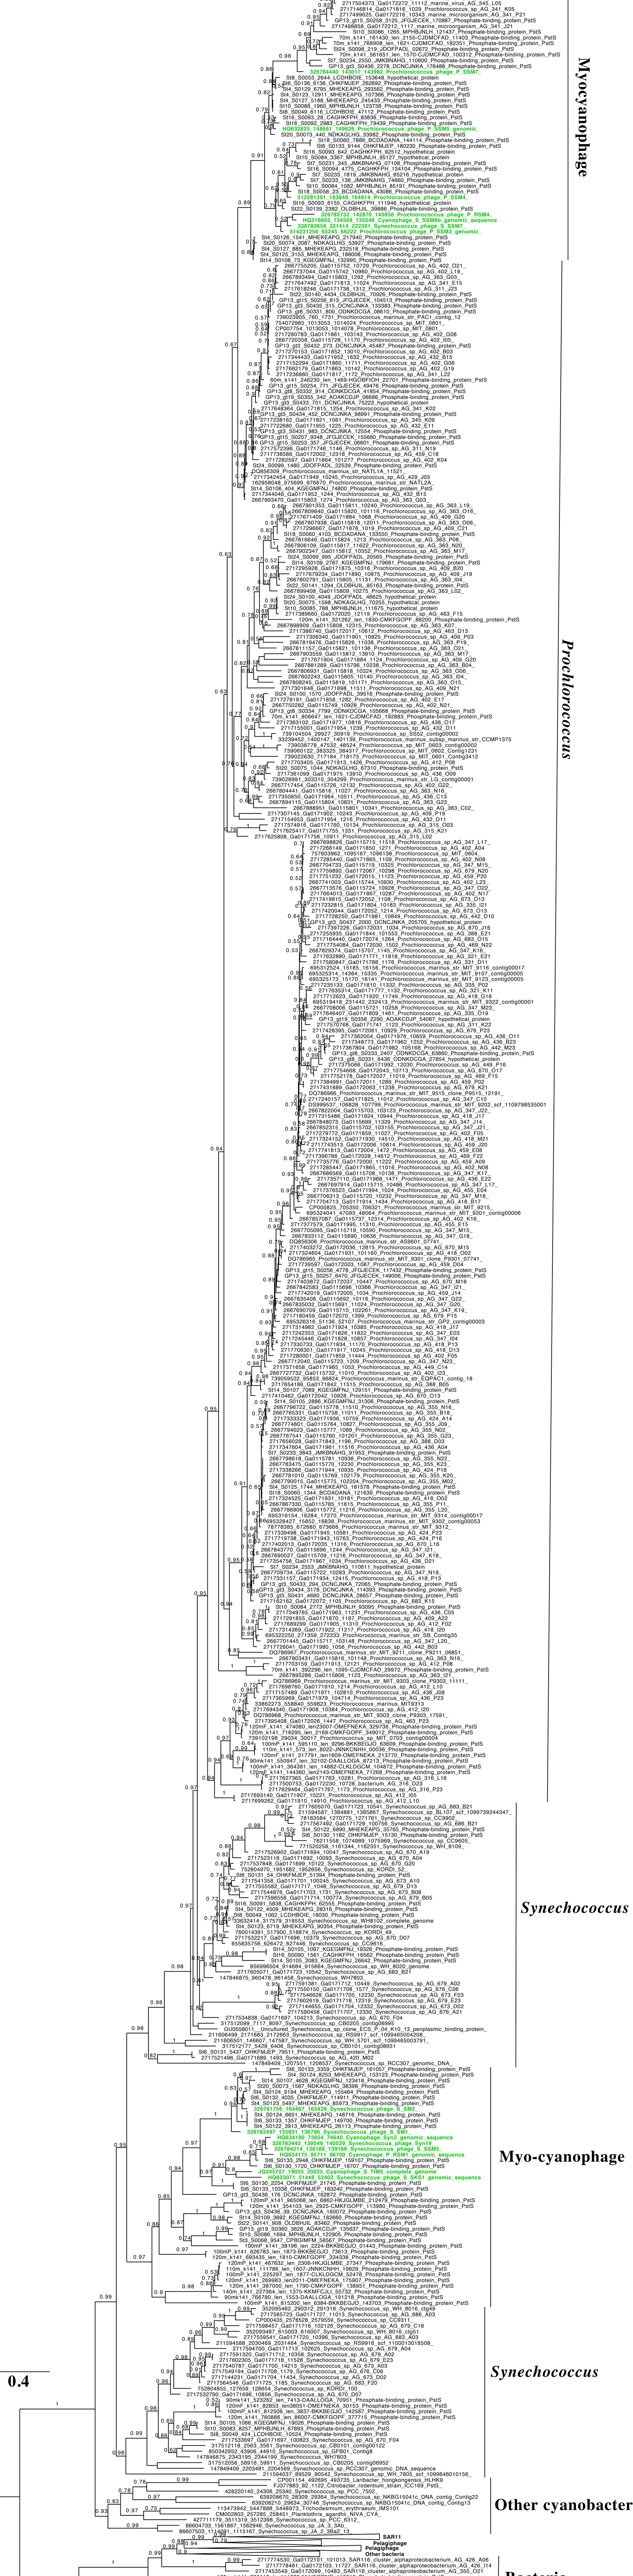

EF601159\_Pseudomonas\_aeruginosa\_strain\_MDR25\_PstS

Mycoyanophage  
Prochlorococcus  
Synechococcus  
Myo-cyanophage  
Other cyanobacteria  
Bacteria







# Heme Oxygenase (*pbsA*)

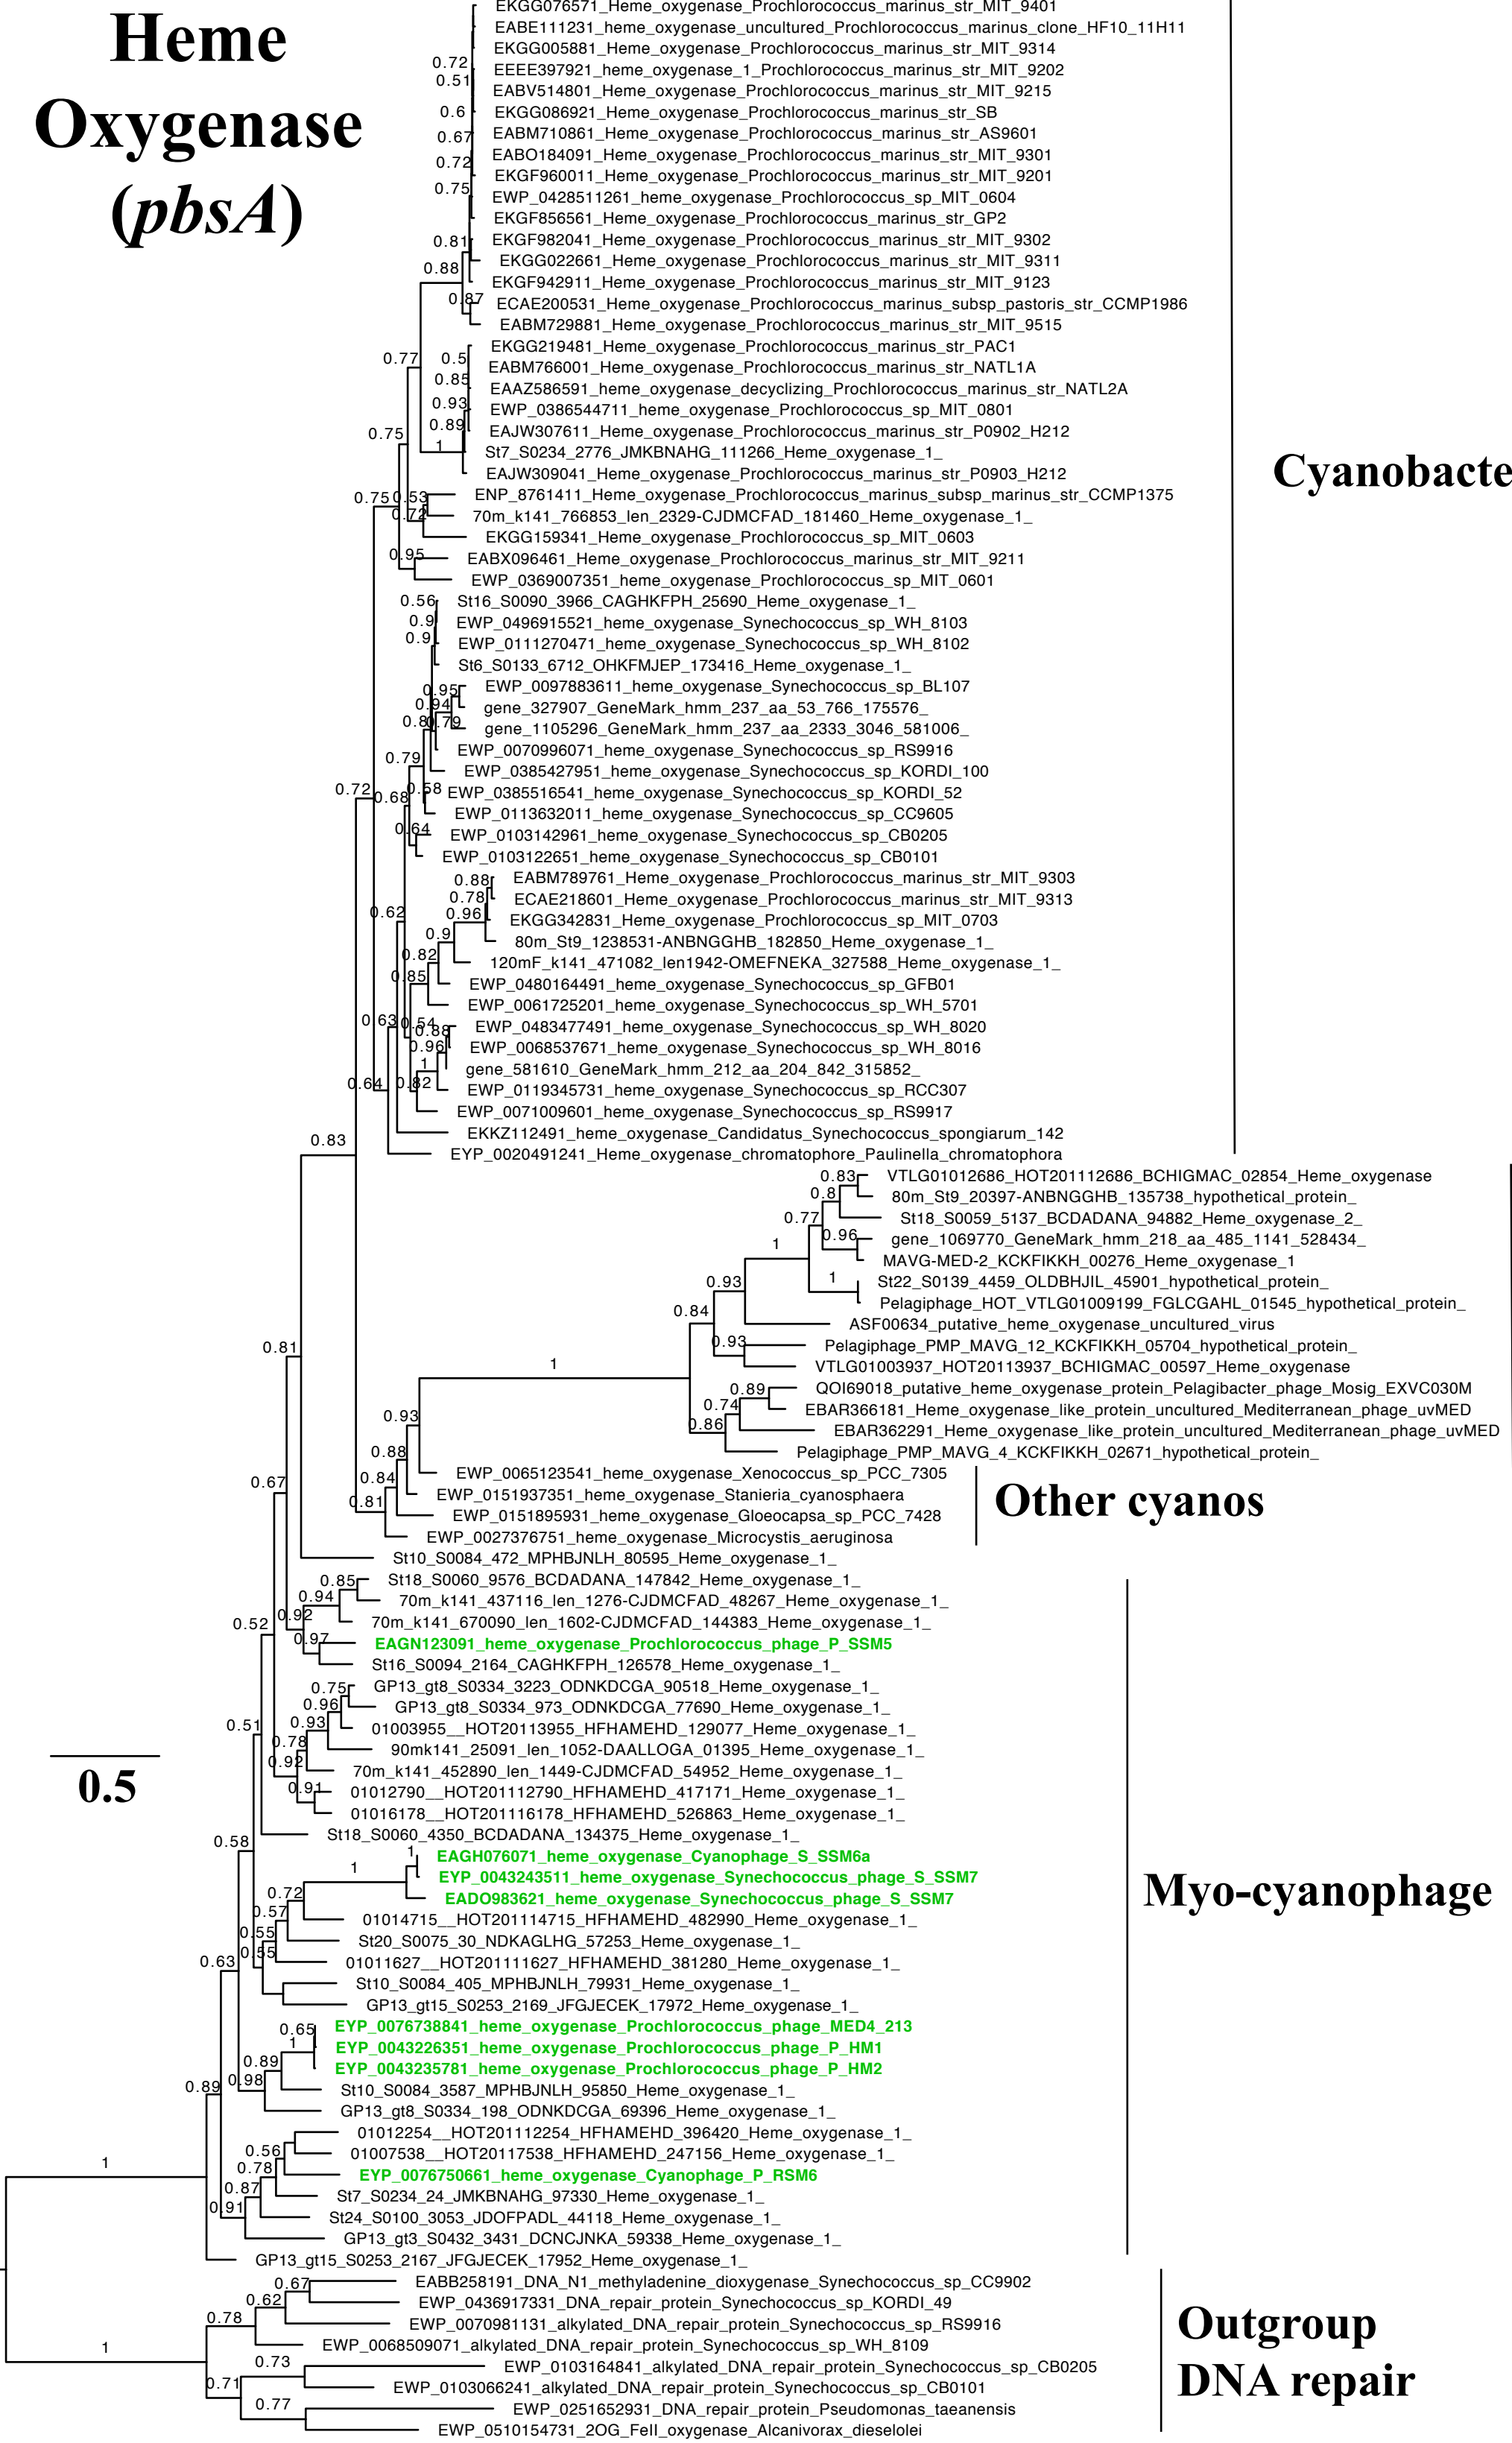



# Photosystem II protein D1 (psbA)

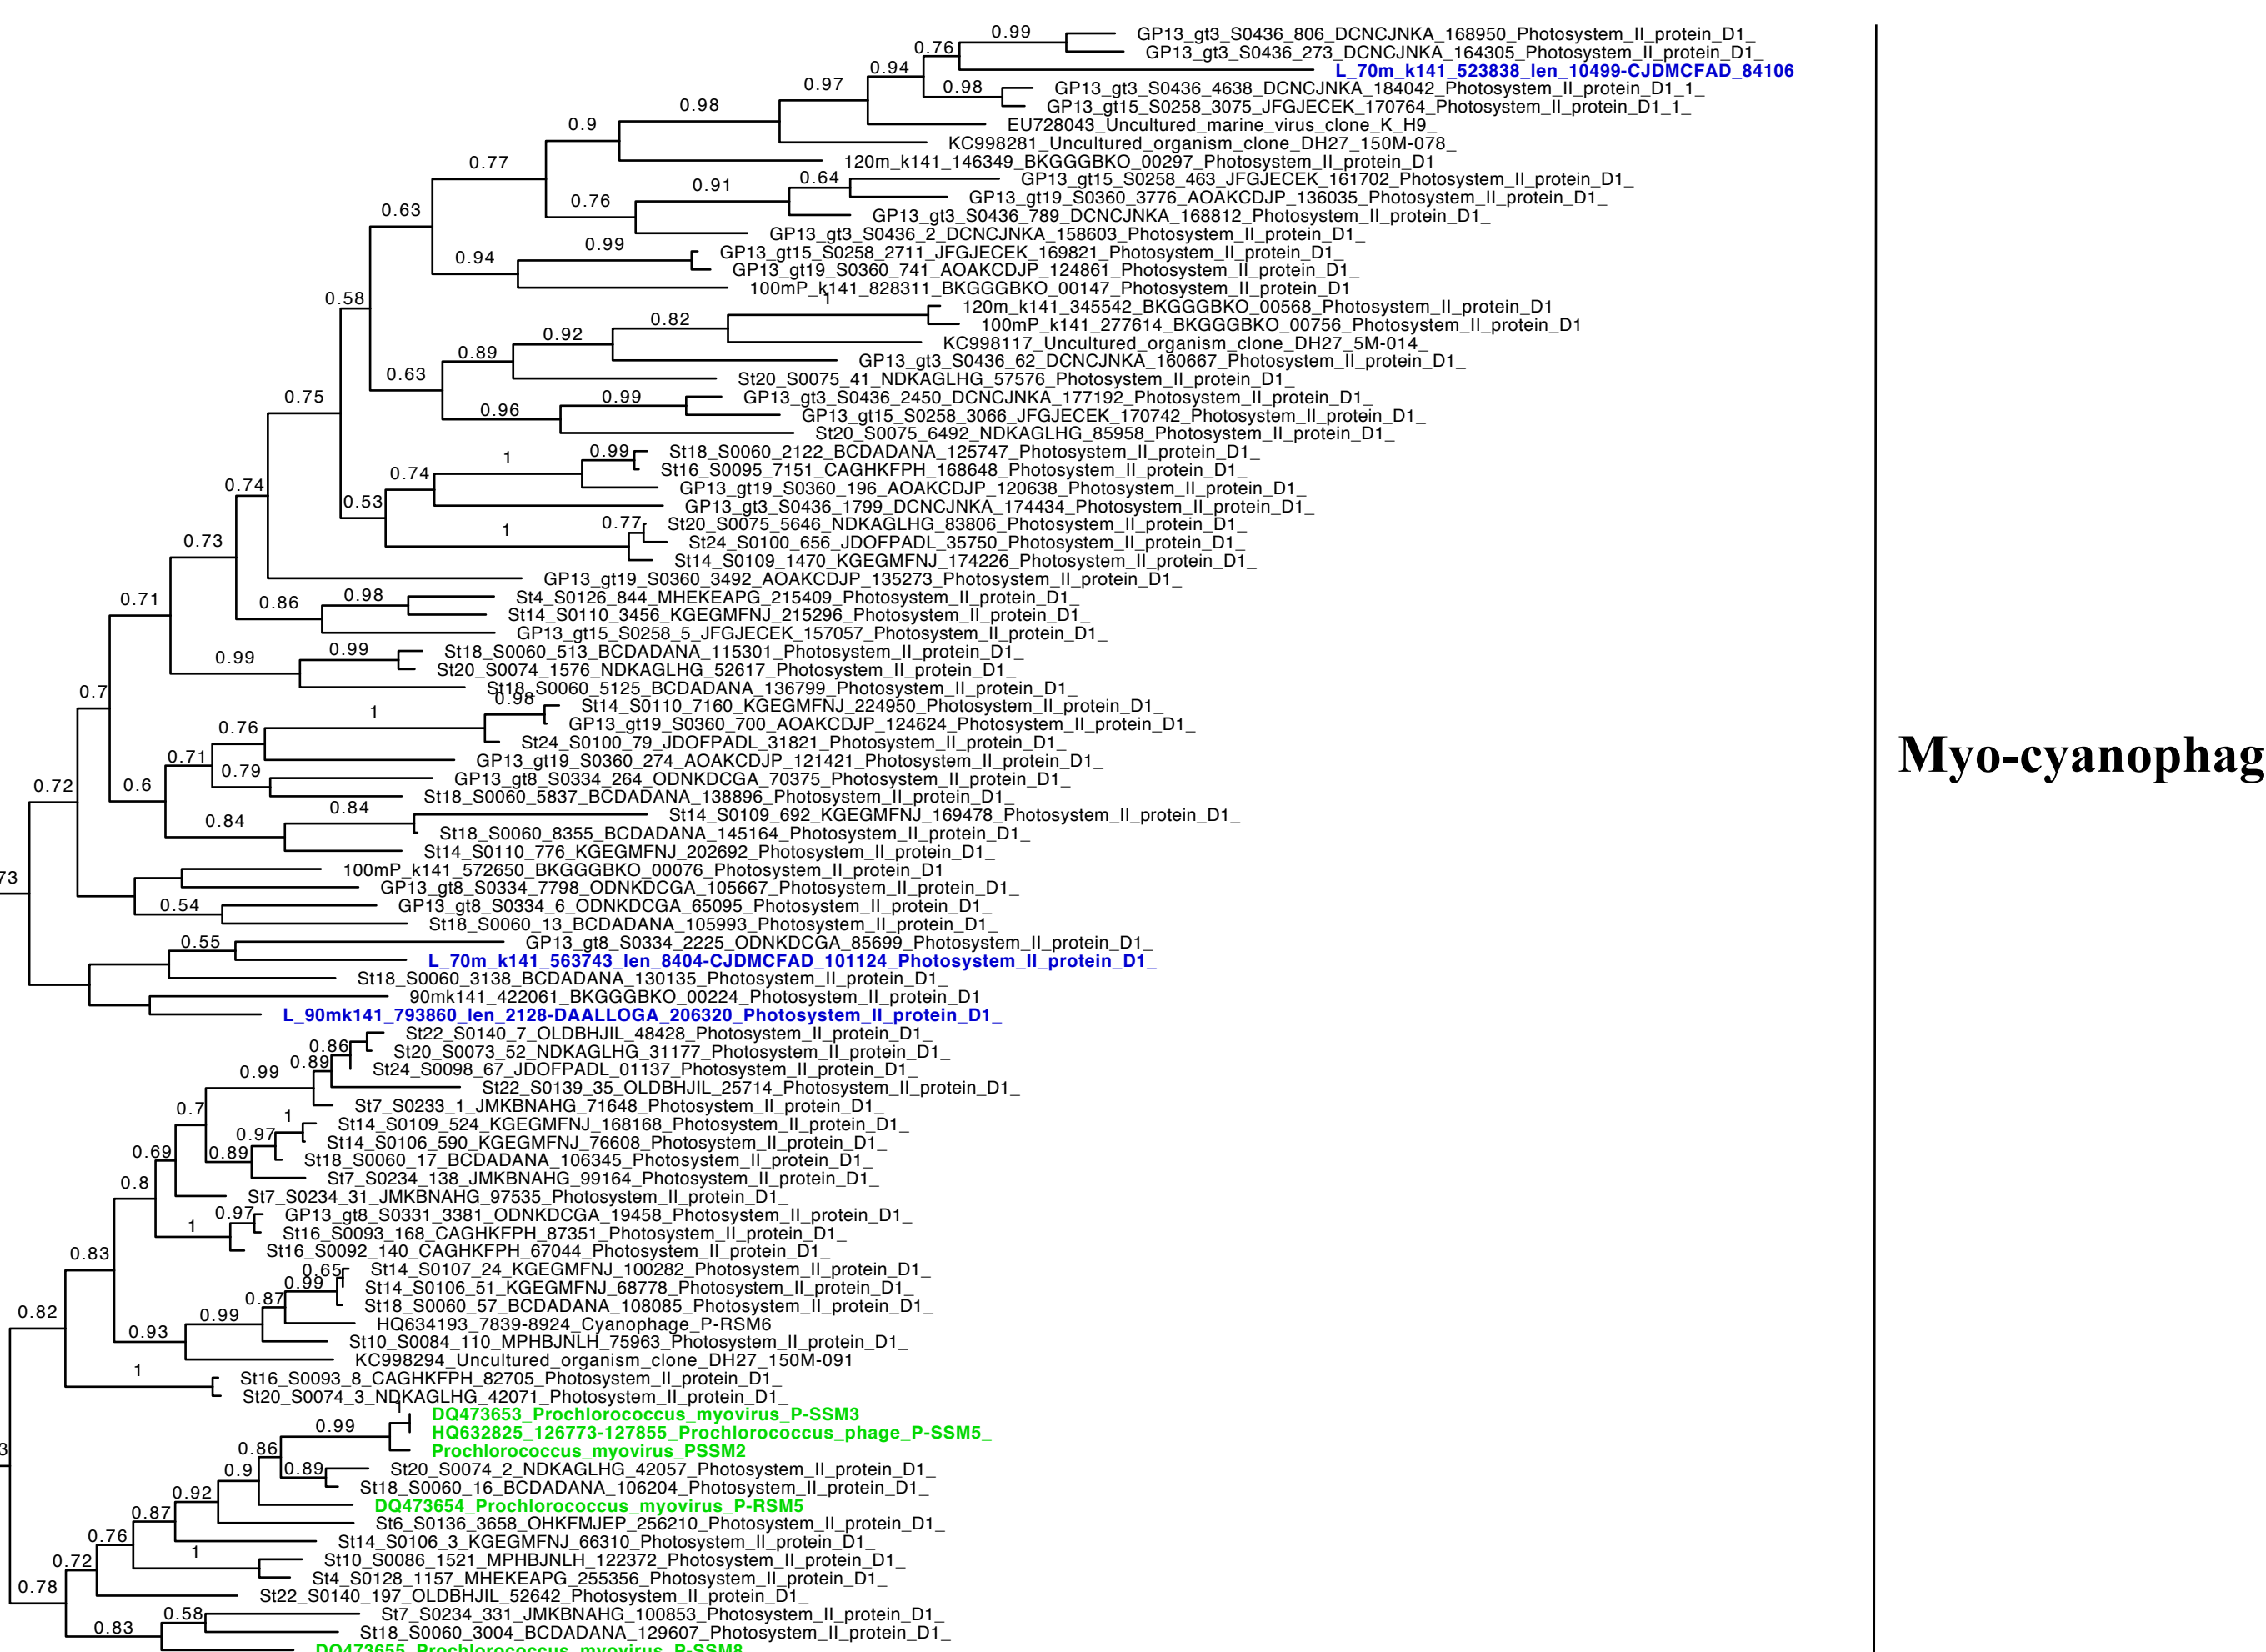

Myo-cyanophage

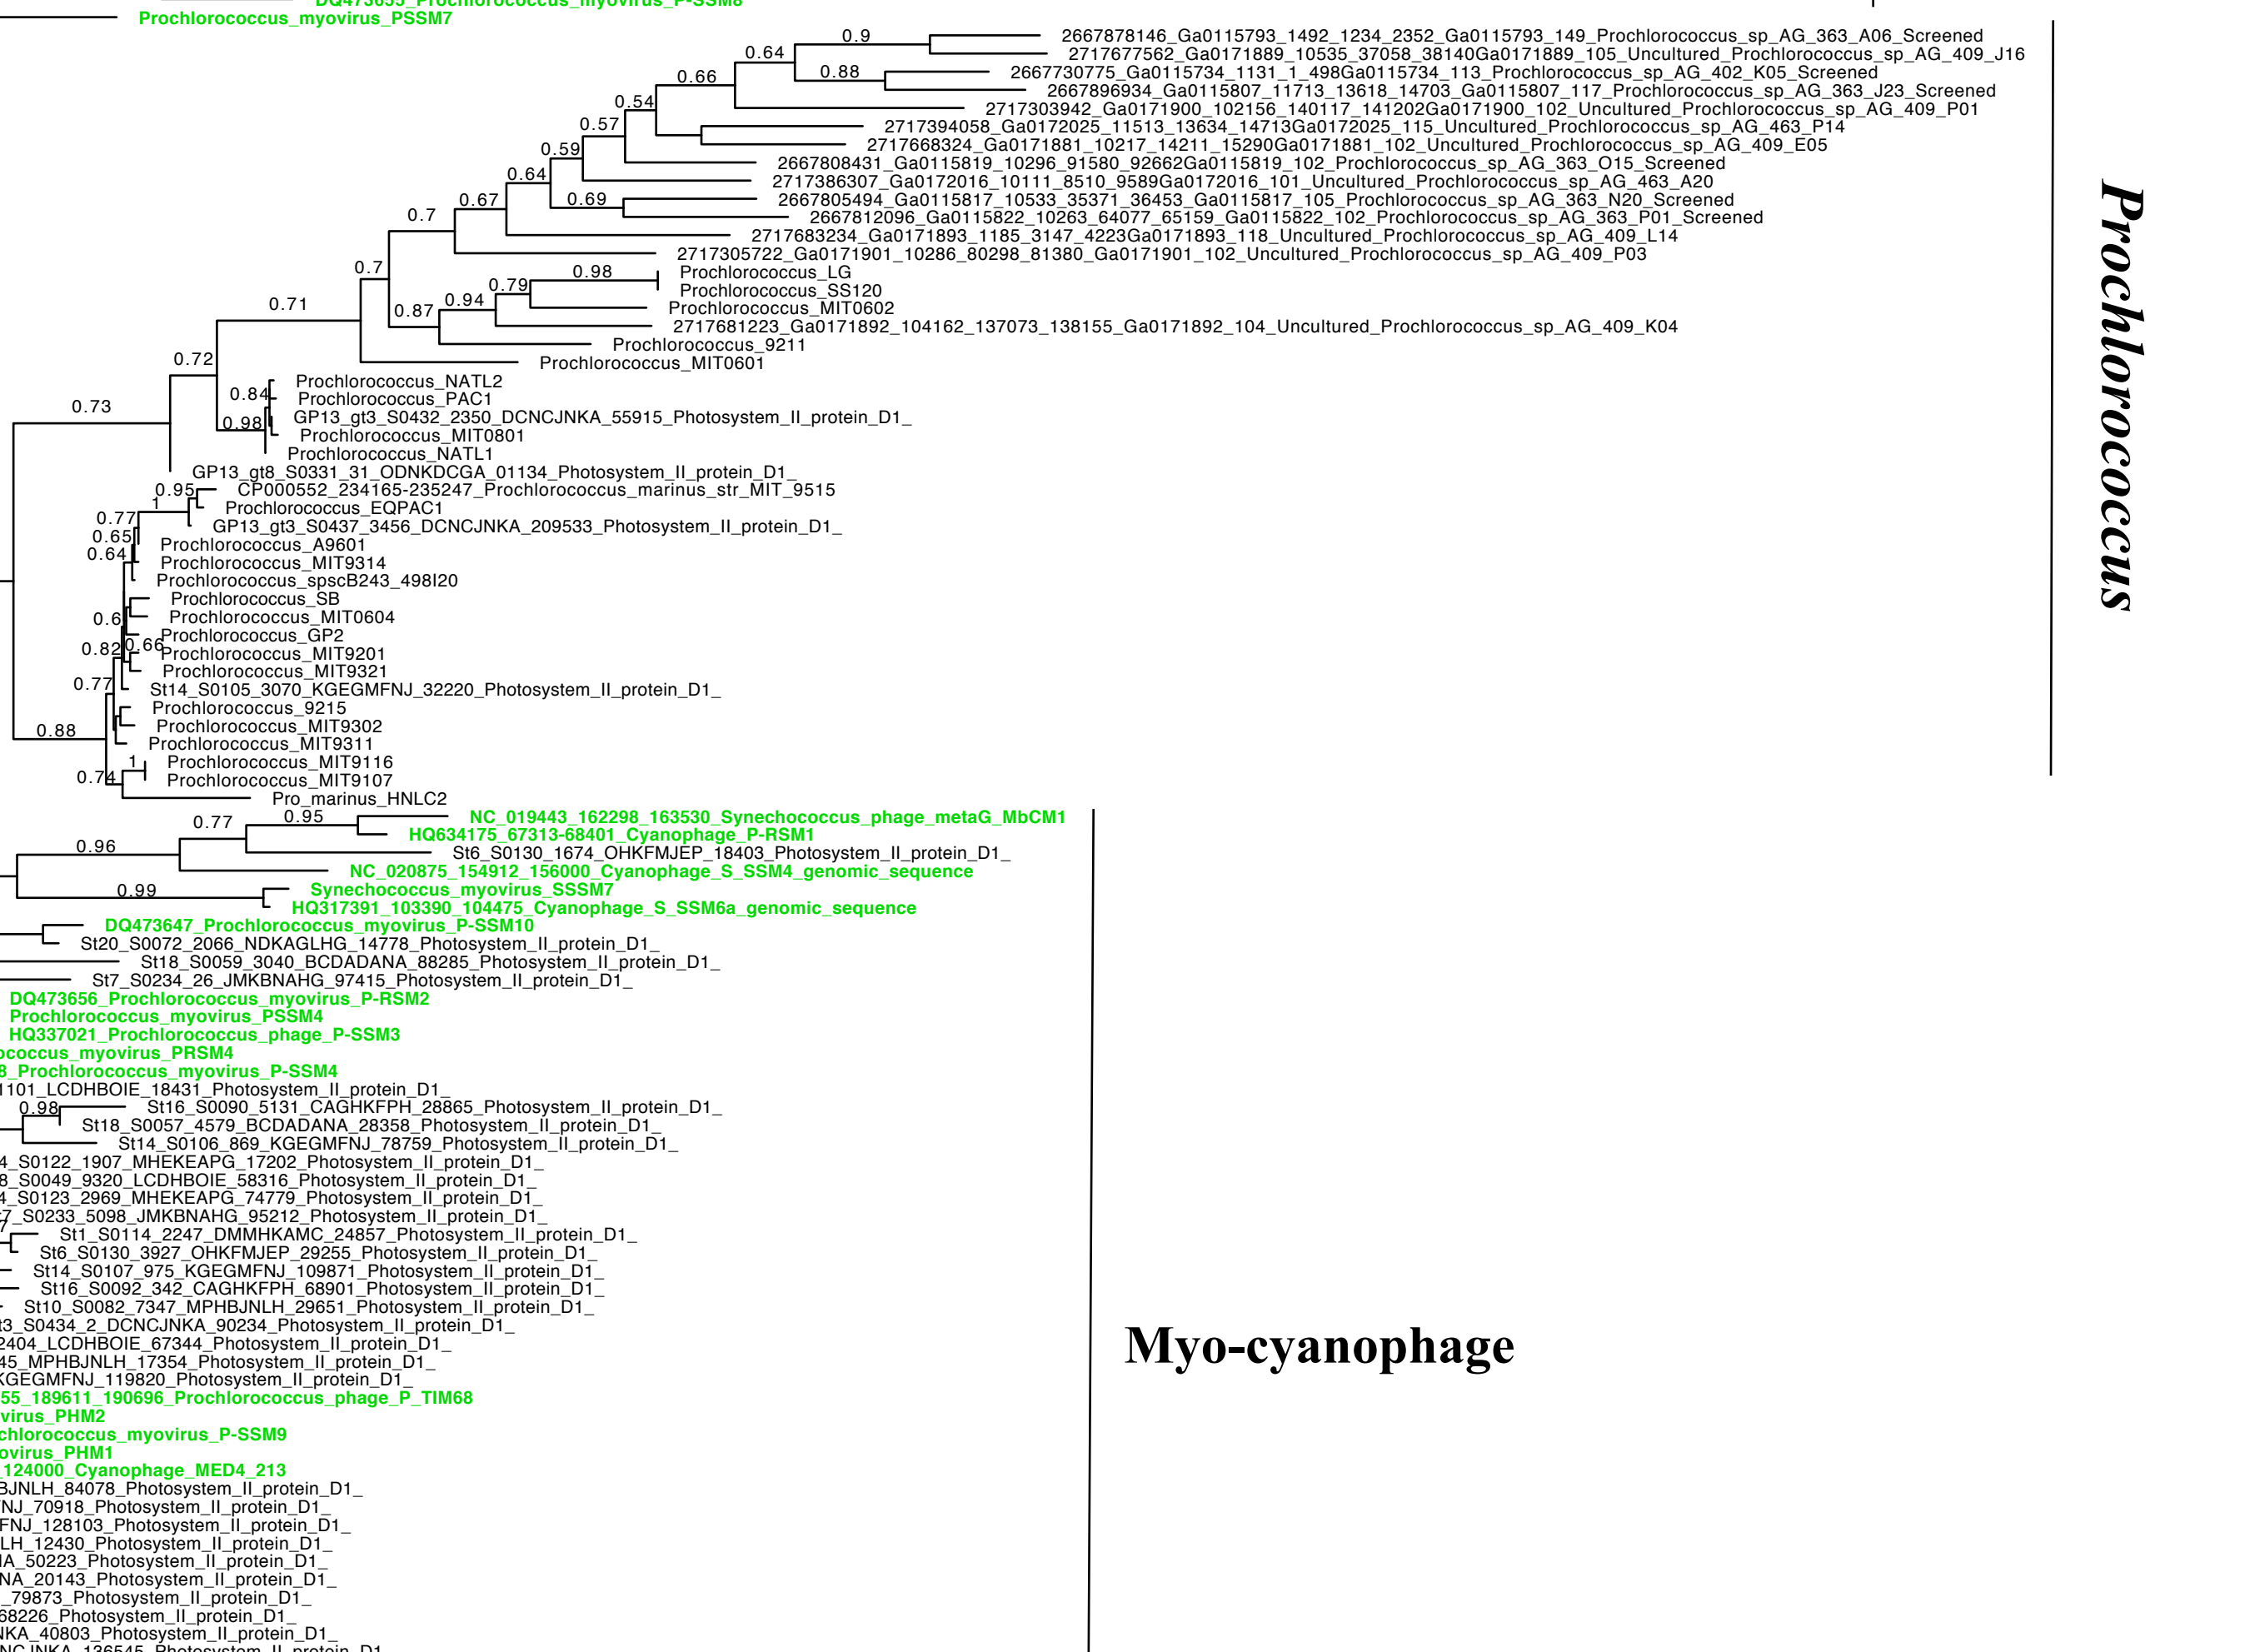

Prochlorococcus

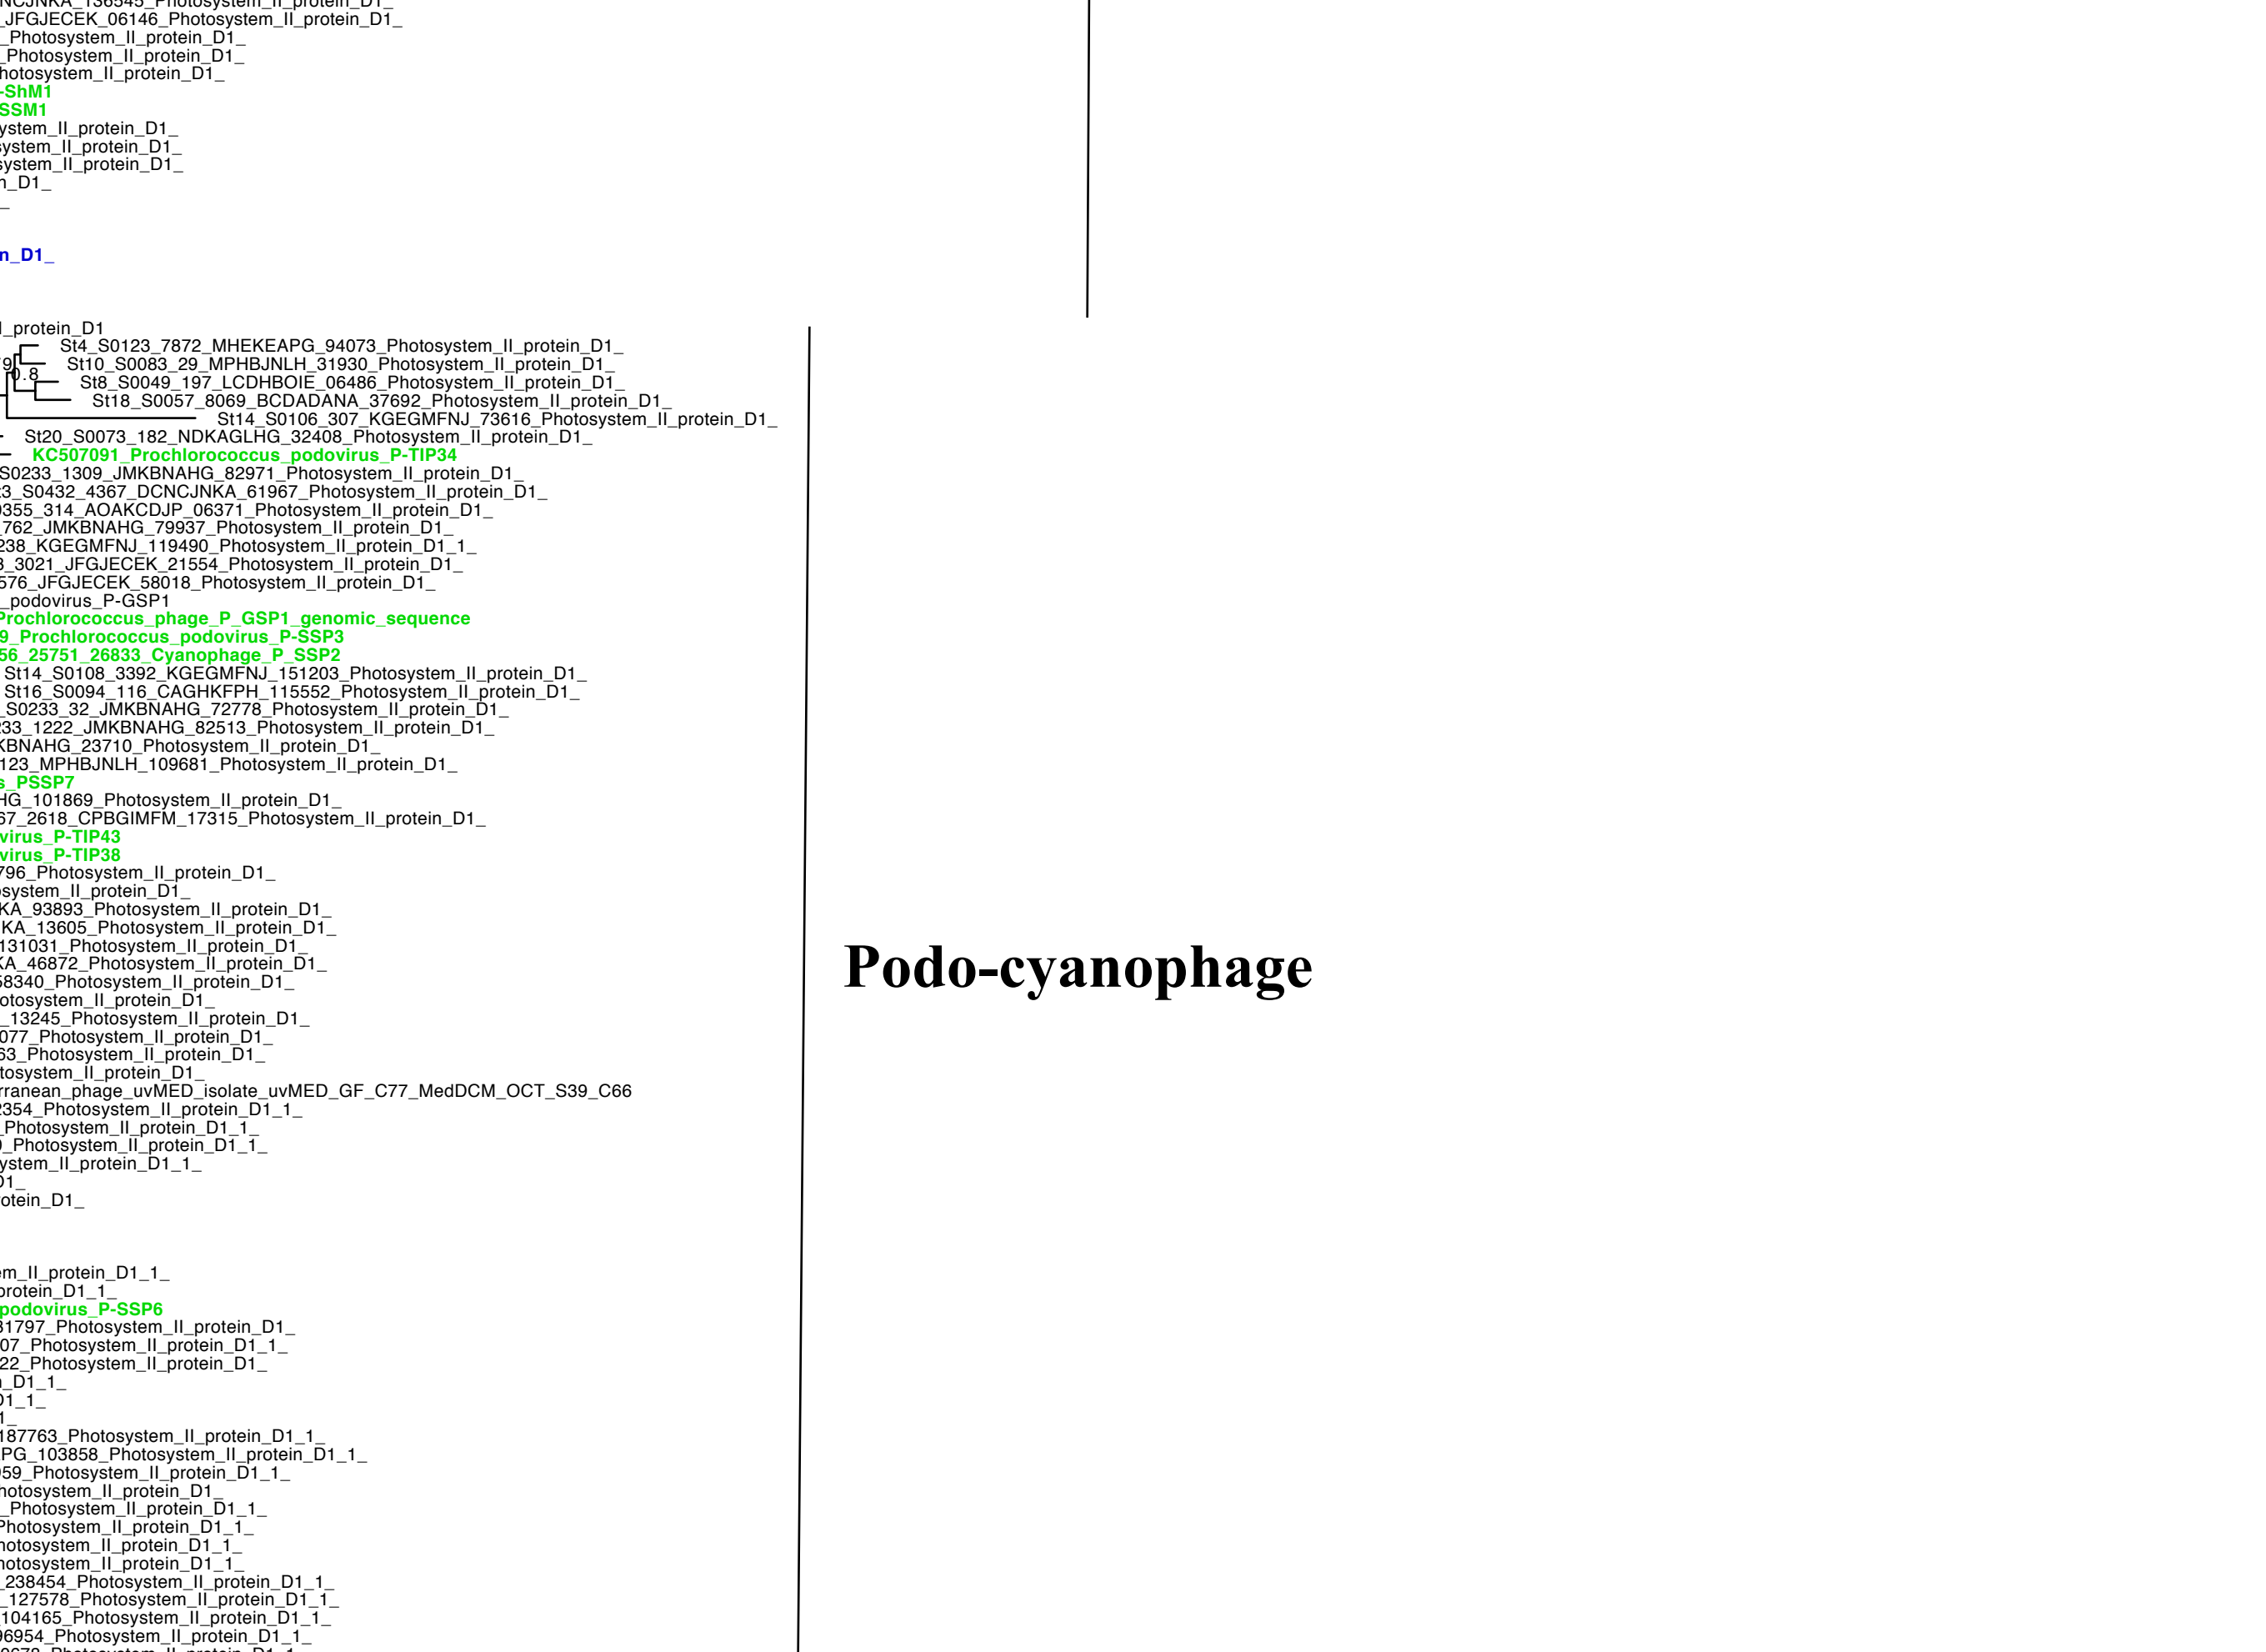

Myo-cyanophage

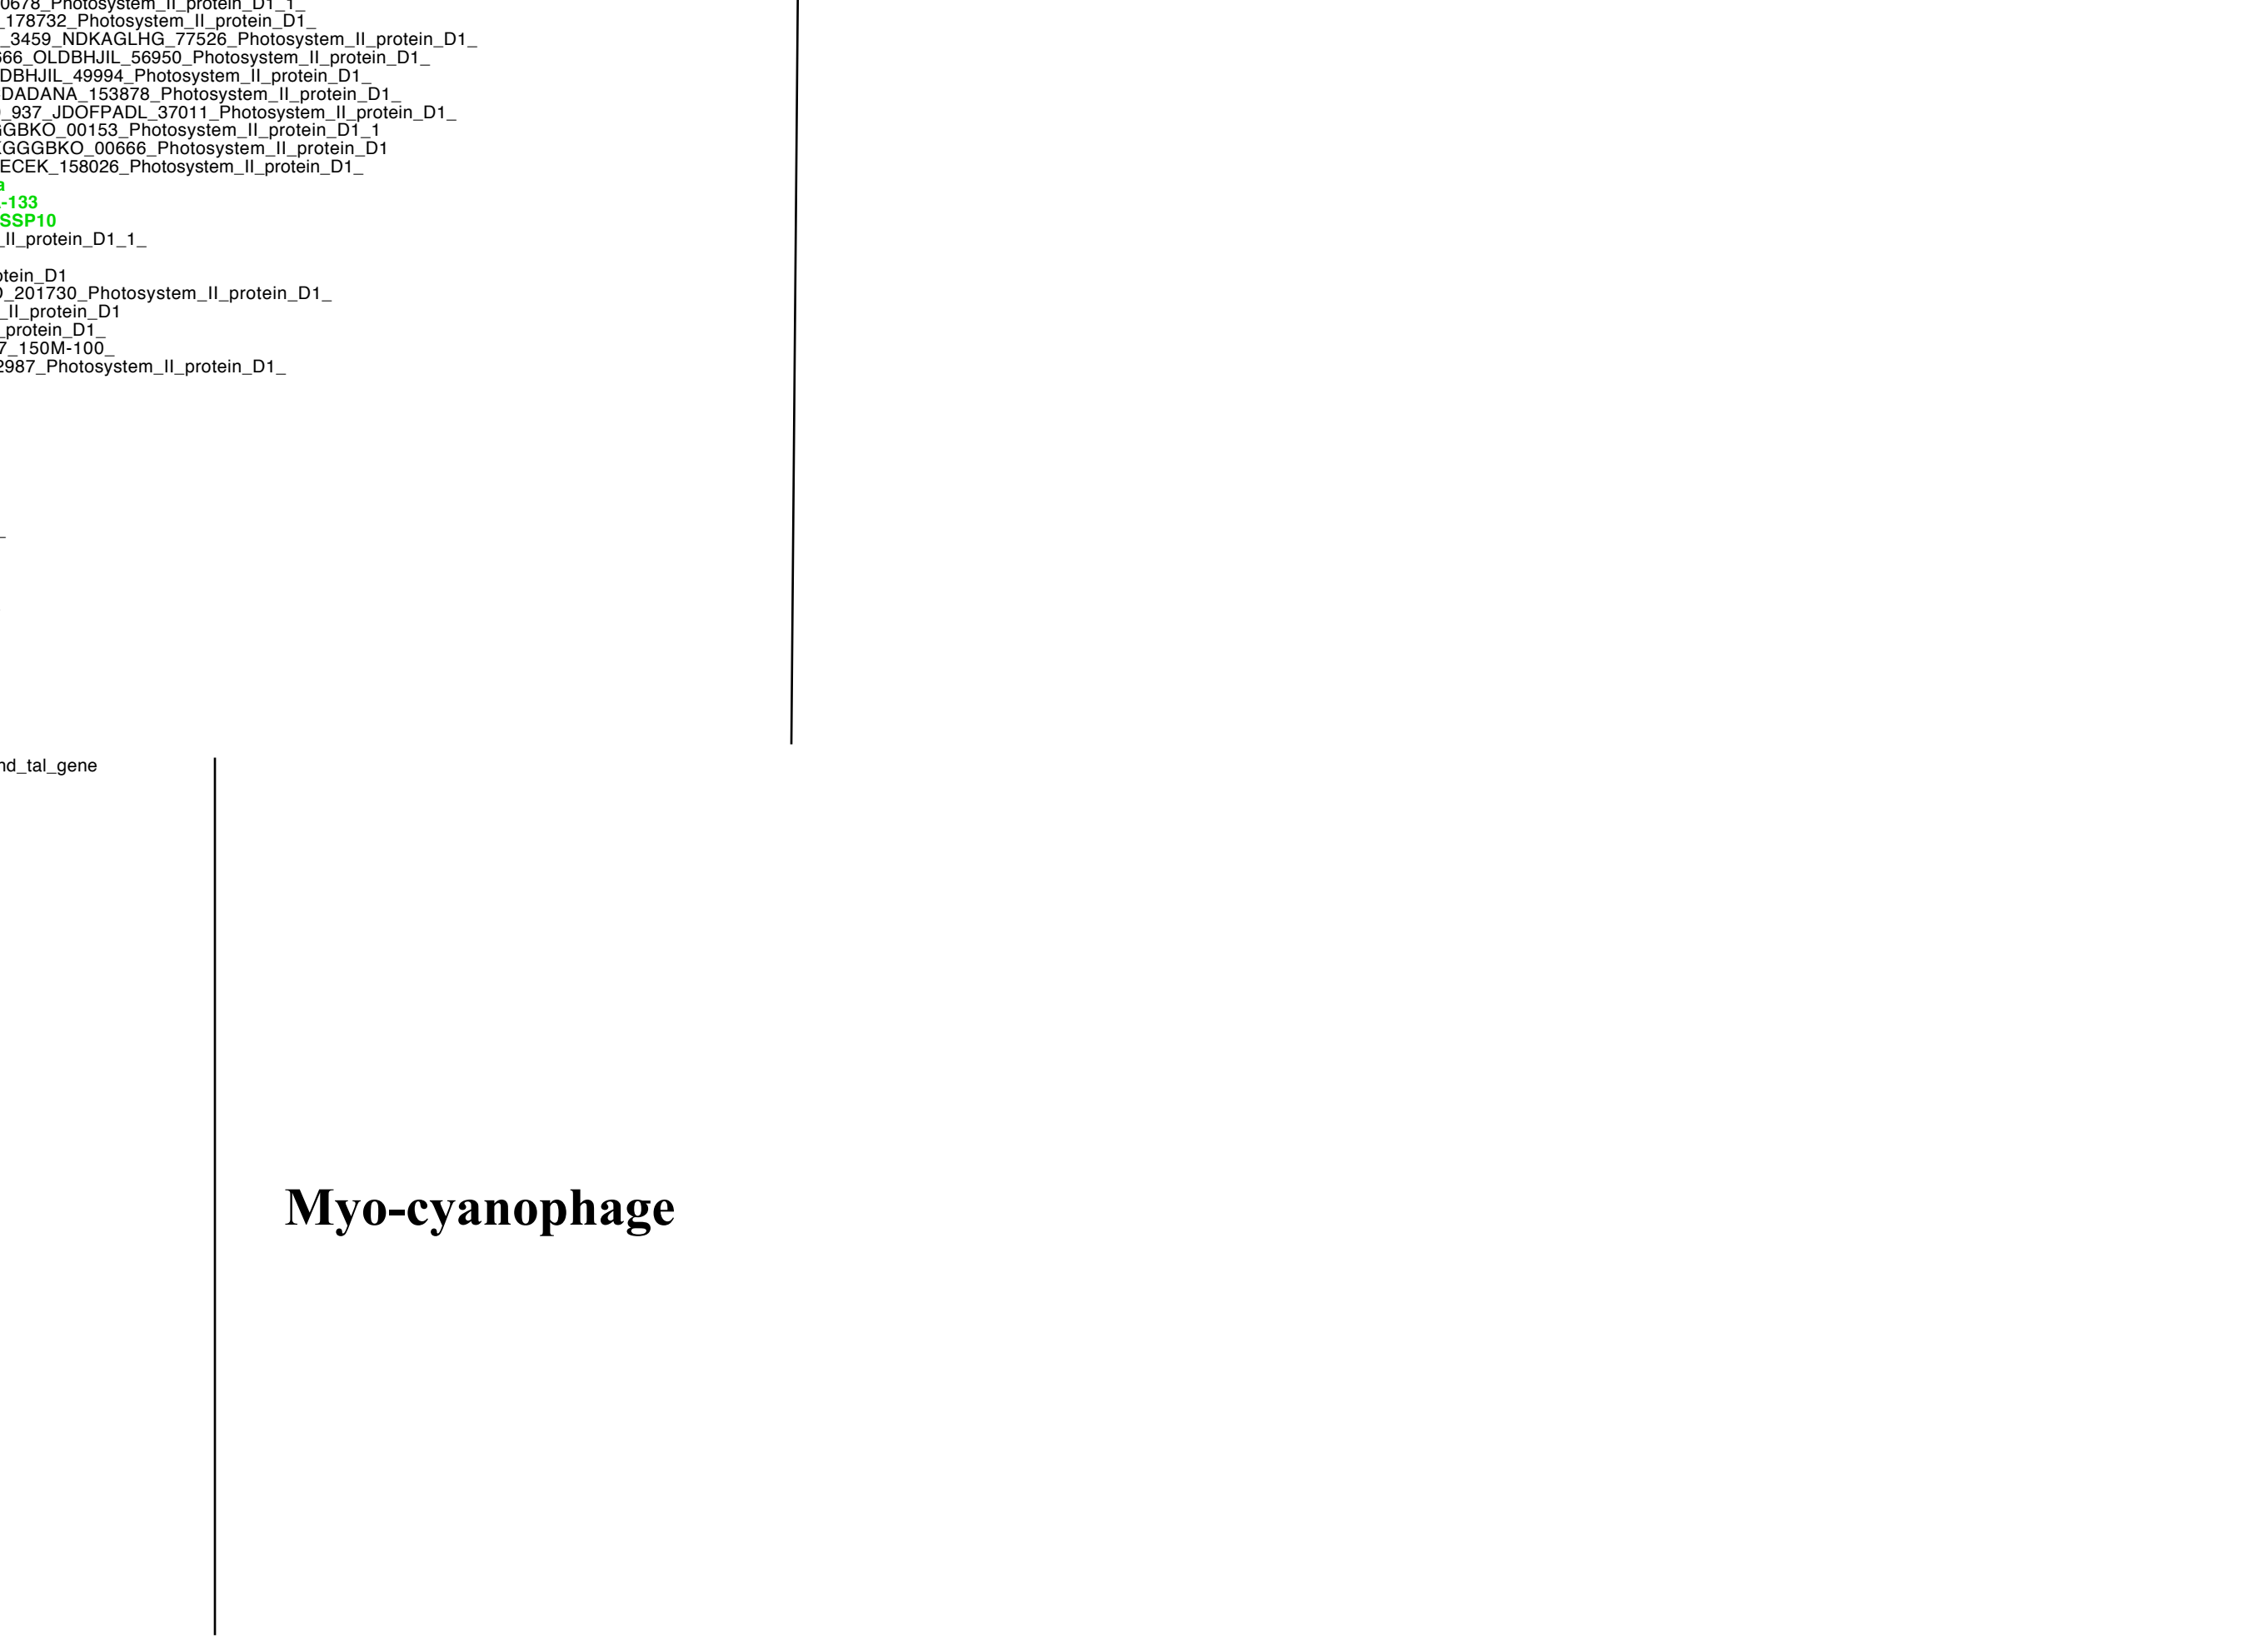

Podo-cyanophage

0.2

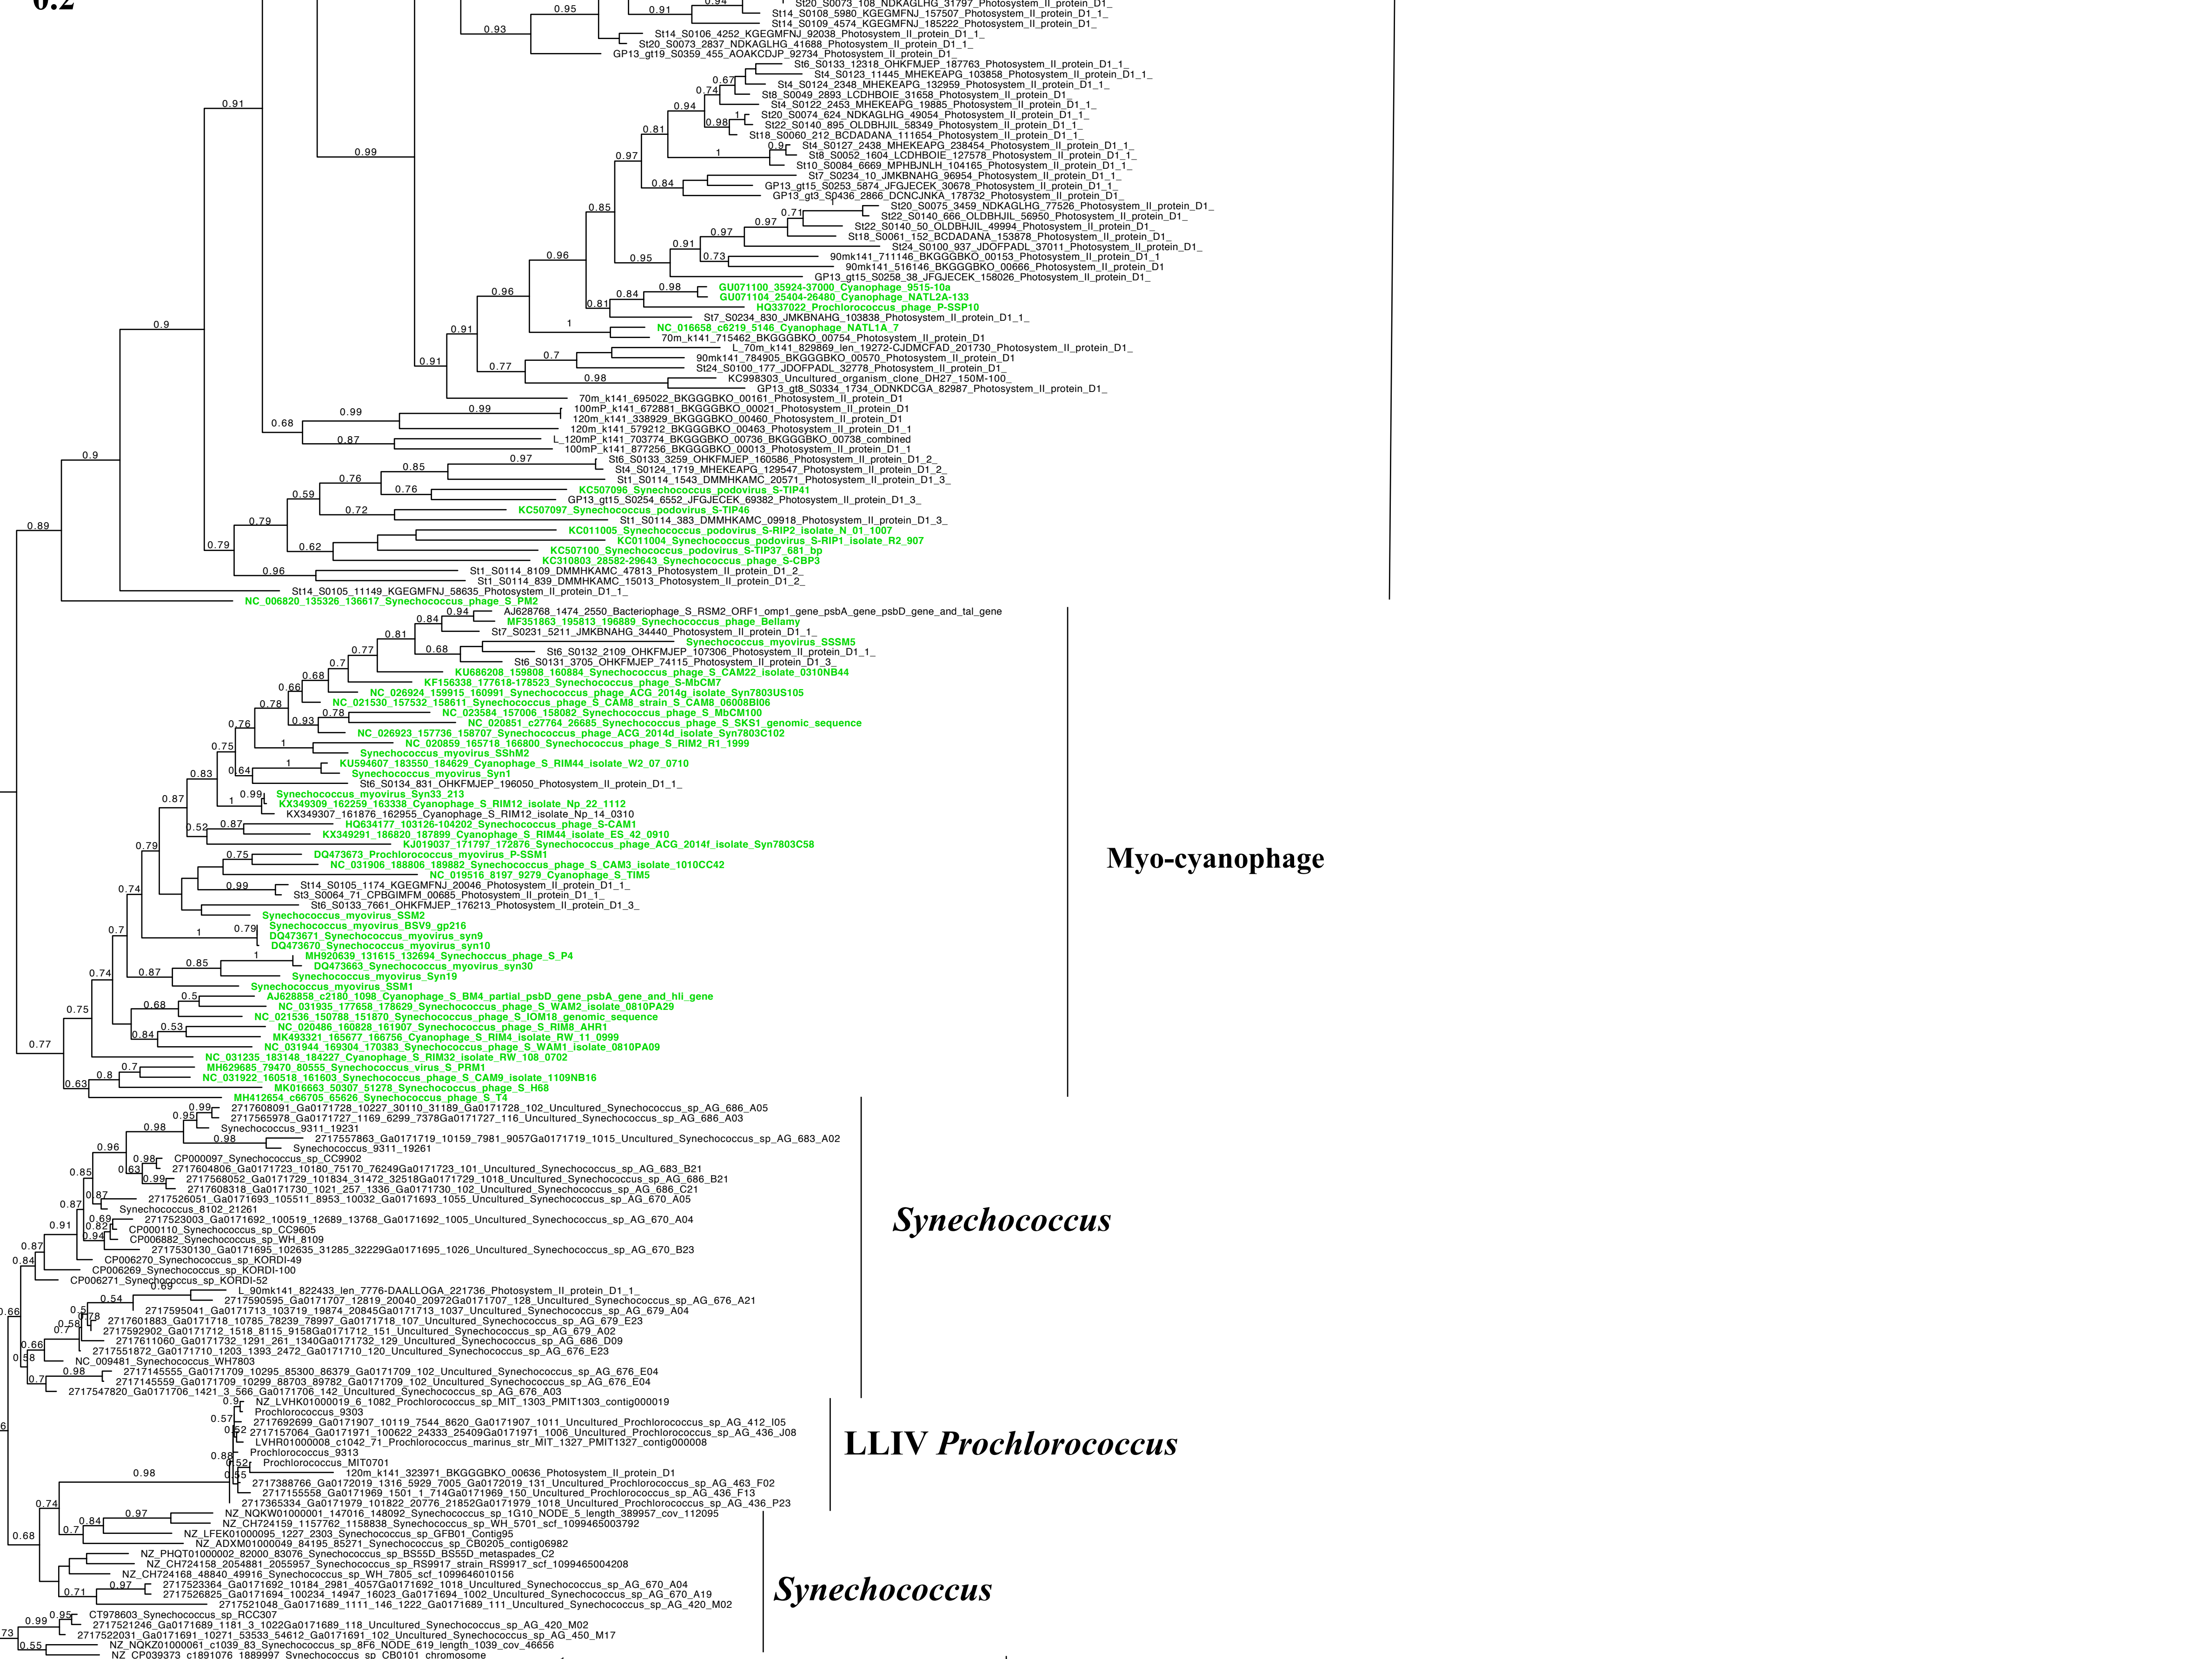

Myo-cyanophage

Synechococcus

LLIV Prochlorococcus

Synechococcus

Chloroplast

Other Cyanobacteria



# Photosystem II D2 (*psbD*)

Myo-cyanophage

*Prochlorococcus*

Myo-cyanophage

*Synechococcus*

Other cyanobacteria

Eukaryotic algae

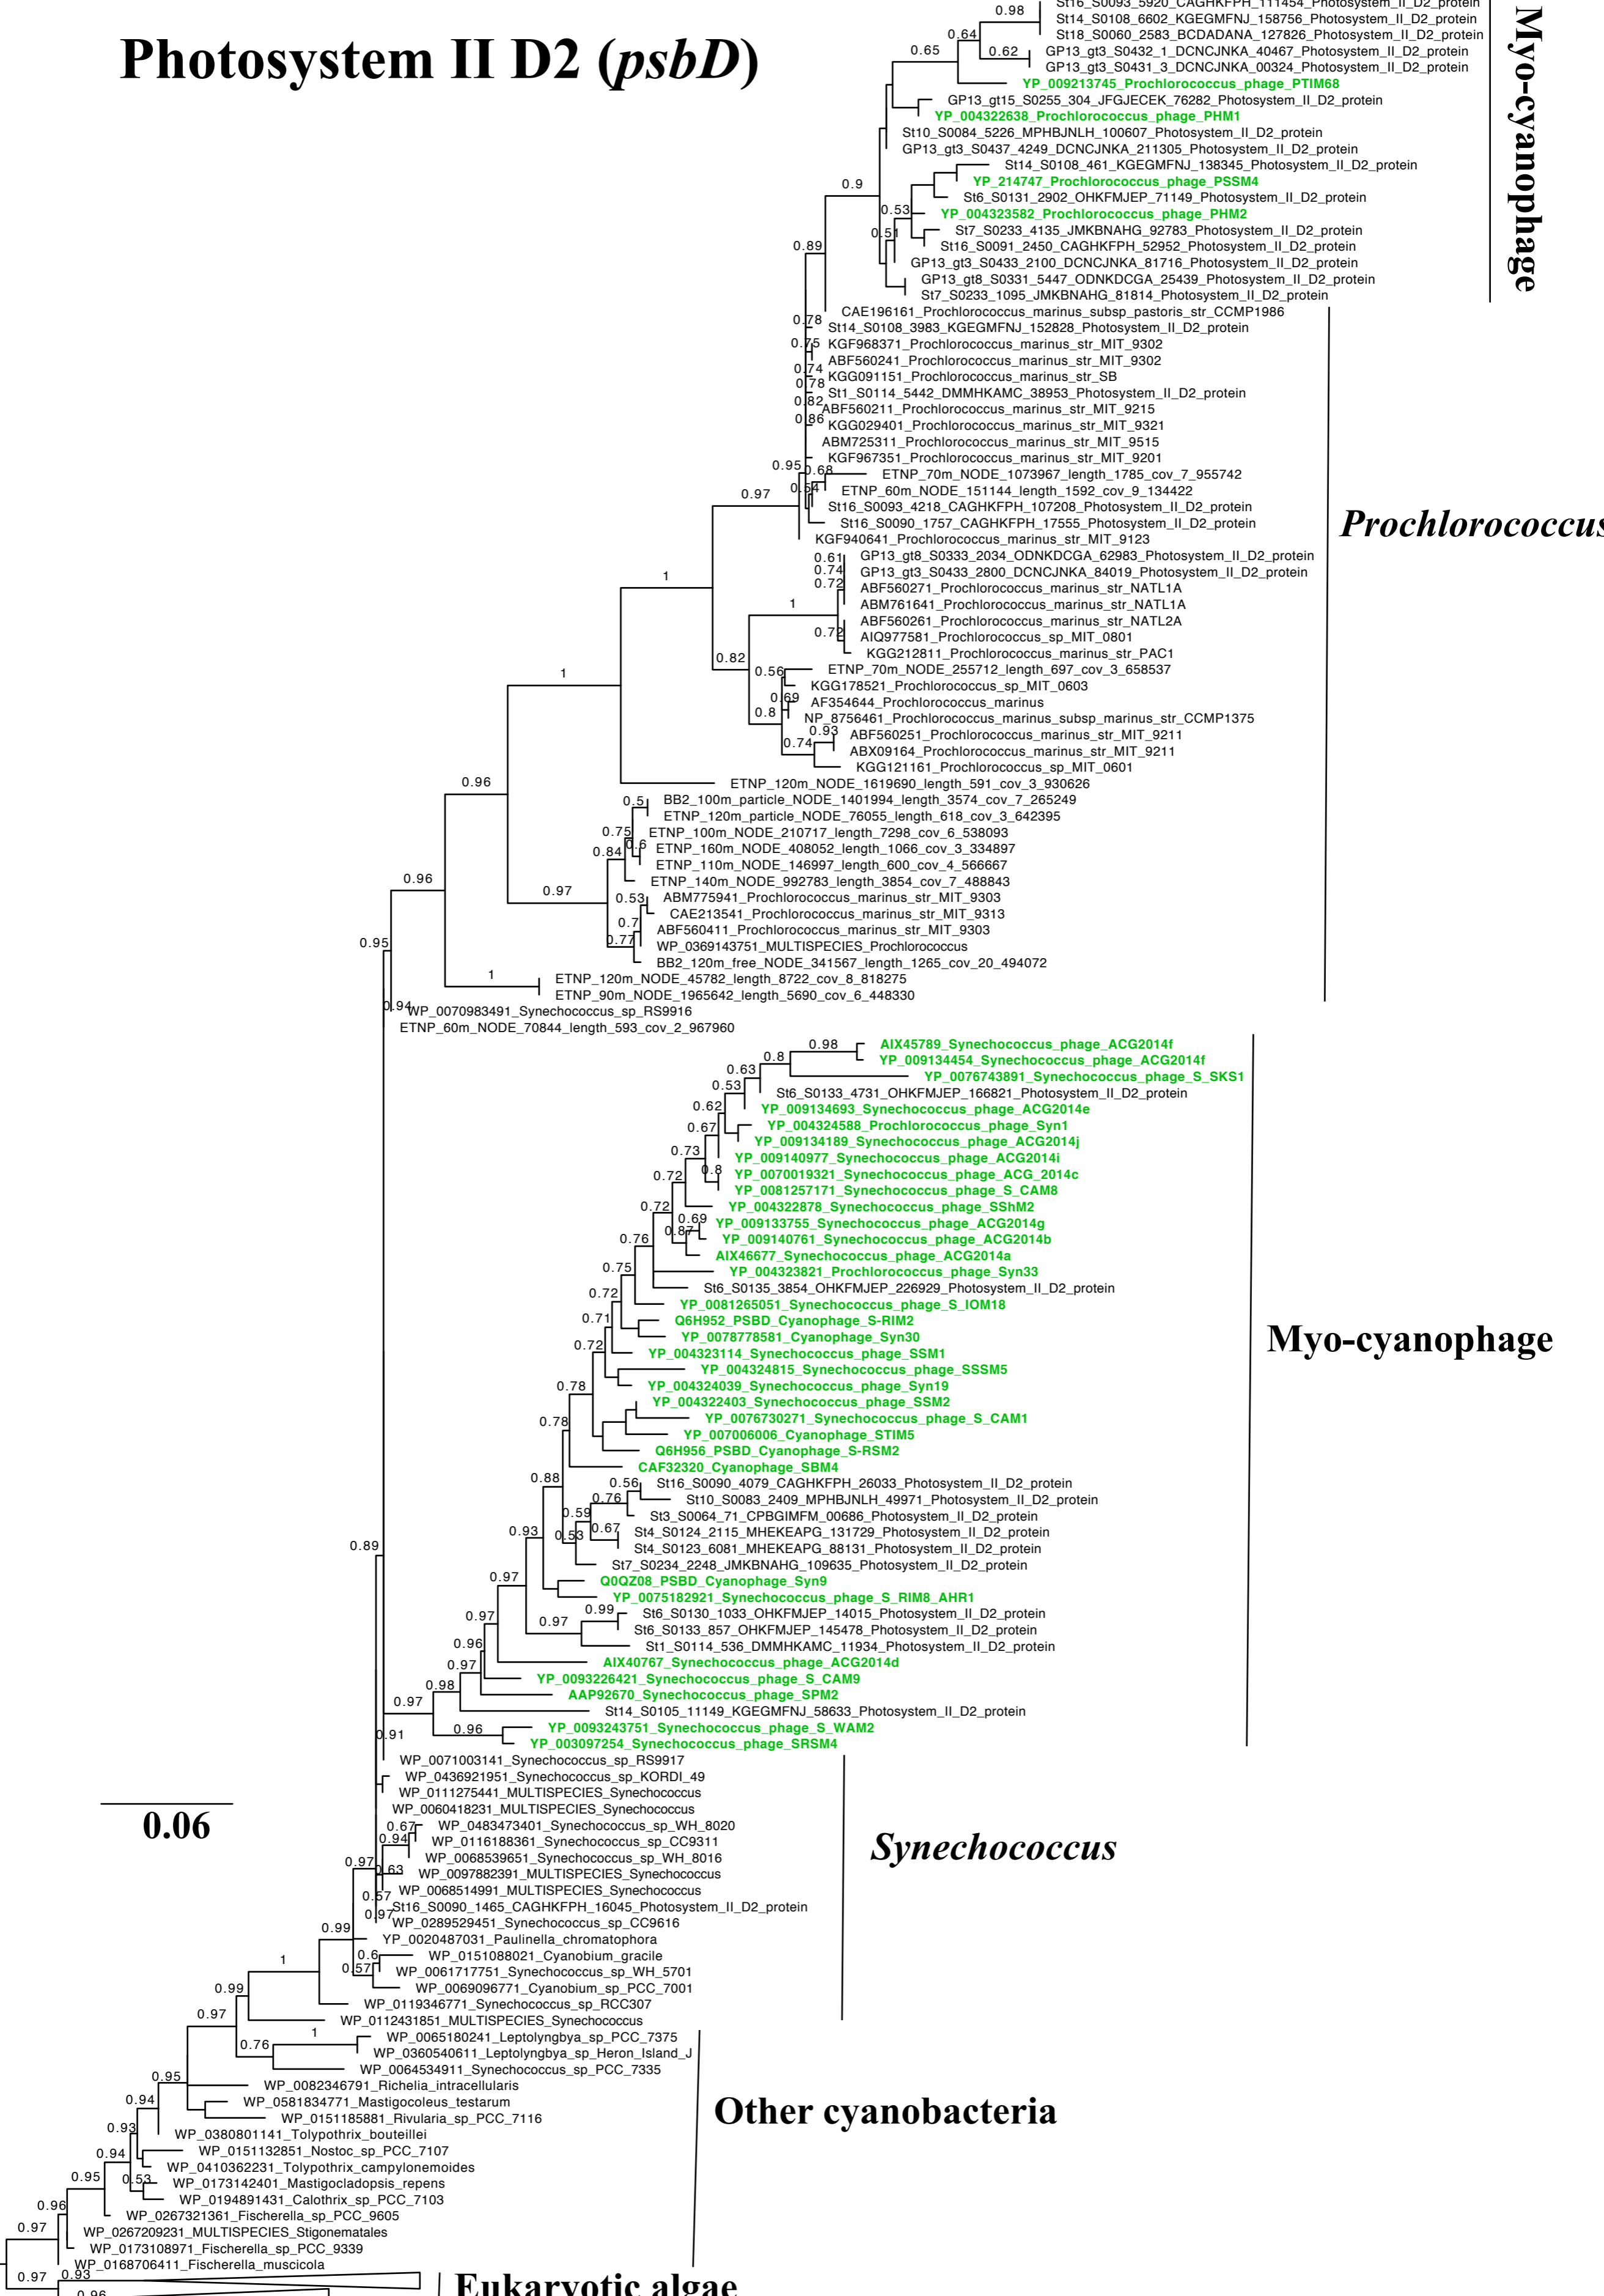



# Transaldolase

(talC)

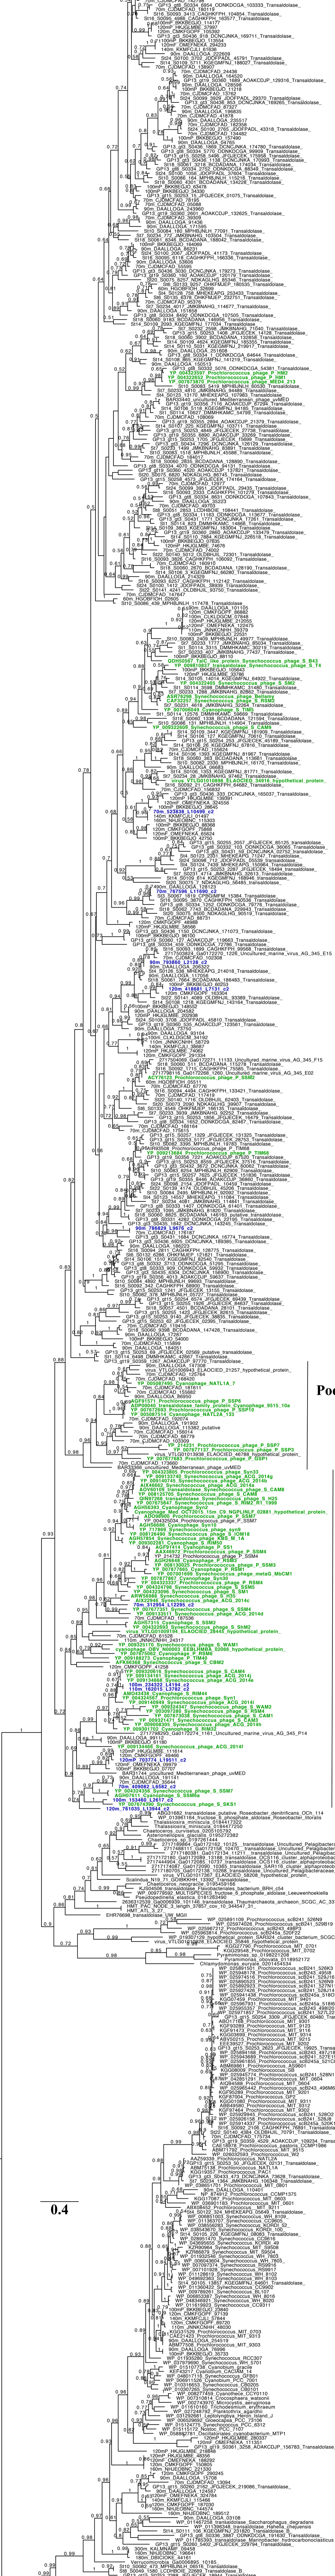

Myo-cyanophage

Podo-cyanophage

Myo-cyanophage

Bacteria

0.4

Cyanobacteria

Bacteria

NCLD.V. ERX55254.13.contig.4500.78



# Thymidylate synthase (*thyX*)

Myo-cyanophage

Prochlorococcus

Myo-cyanophage

Myo-cyanophage

Myo-Cyanophage

Outgroup

Sipho-cyanophage

LLIV *Prochlorococcus*

Sipho-cyanophage

Podo-cyanophage

Pelagiphage

Pelagiphage

SAR11

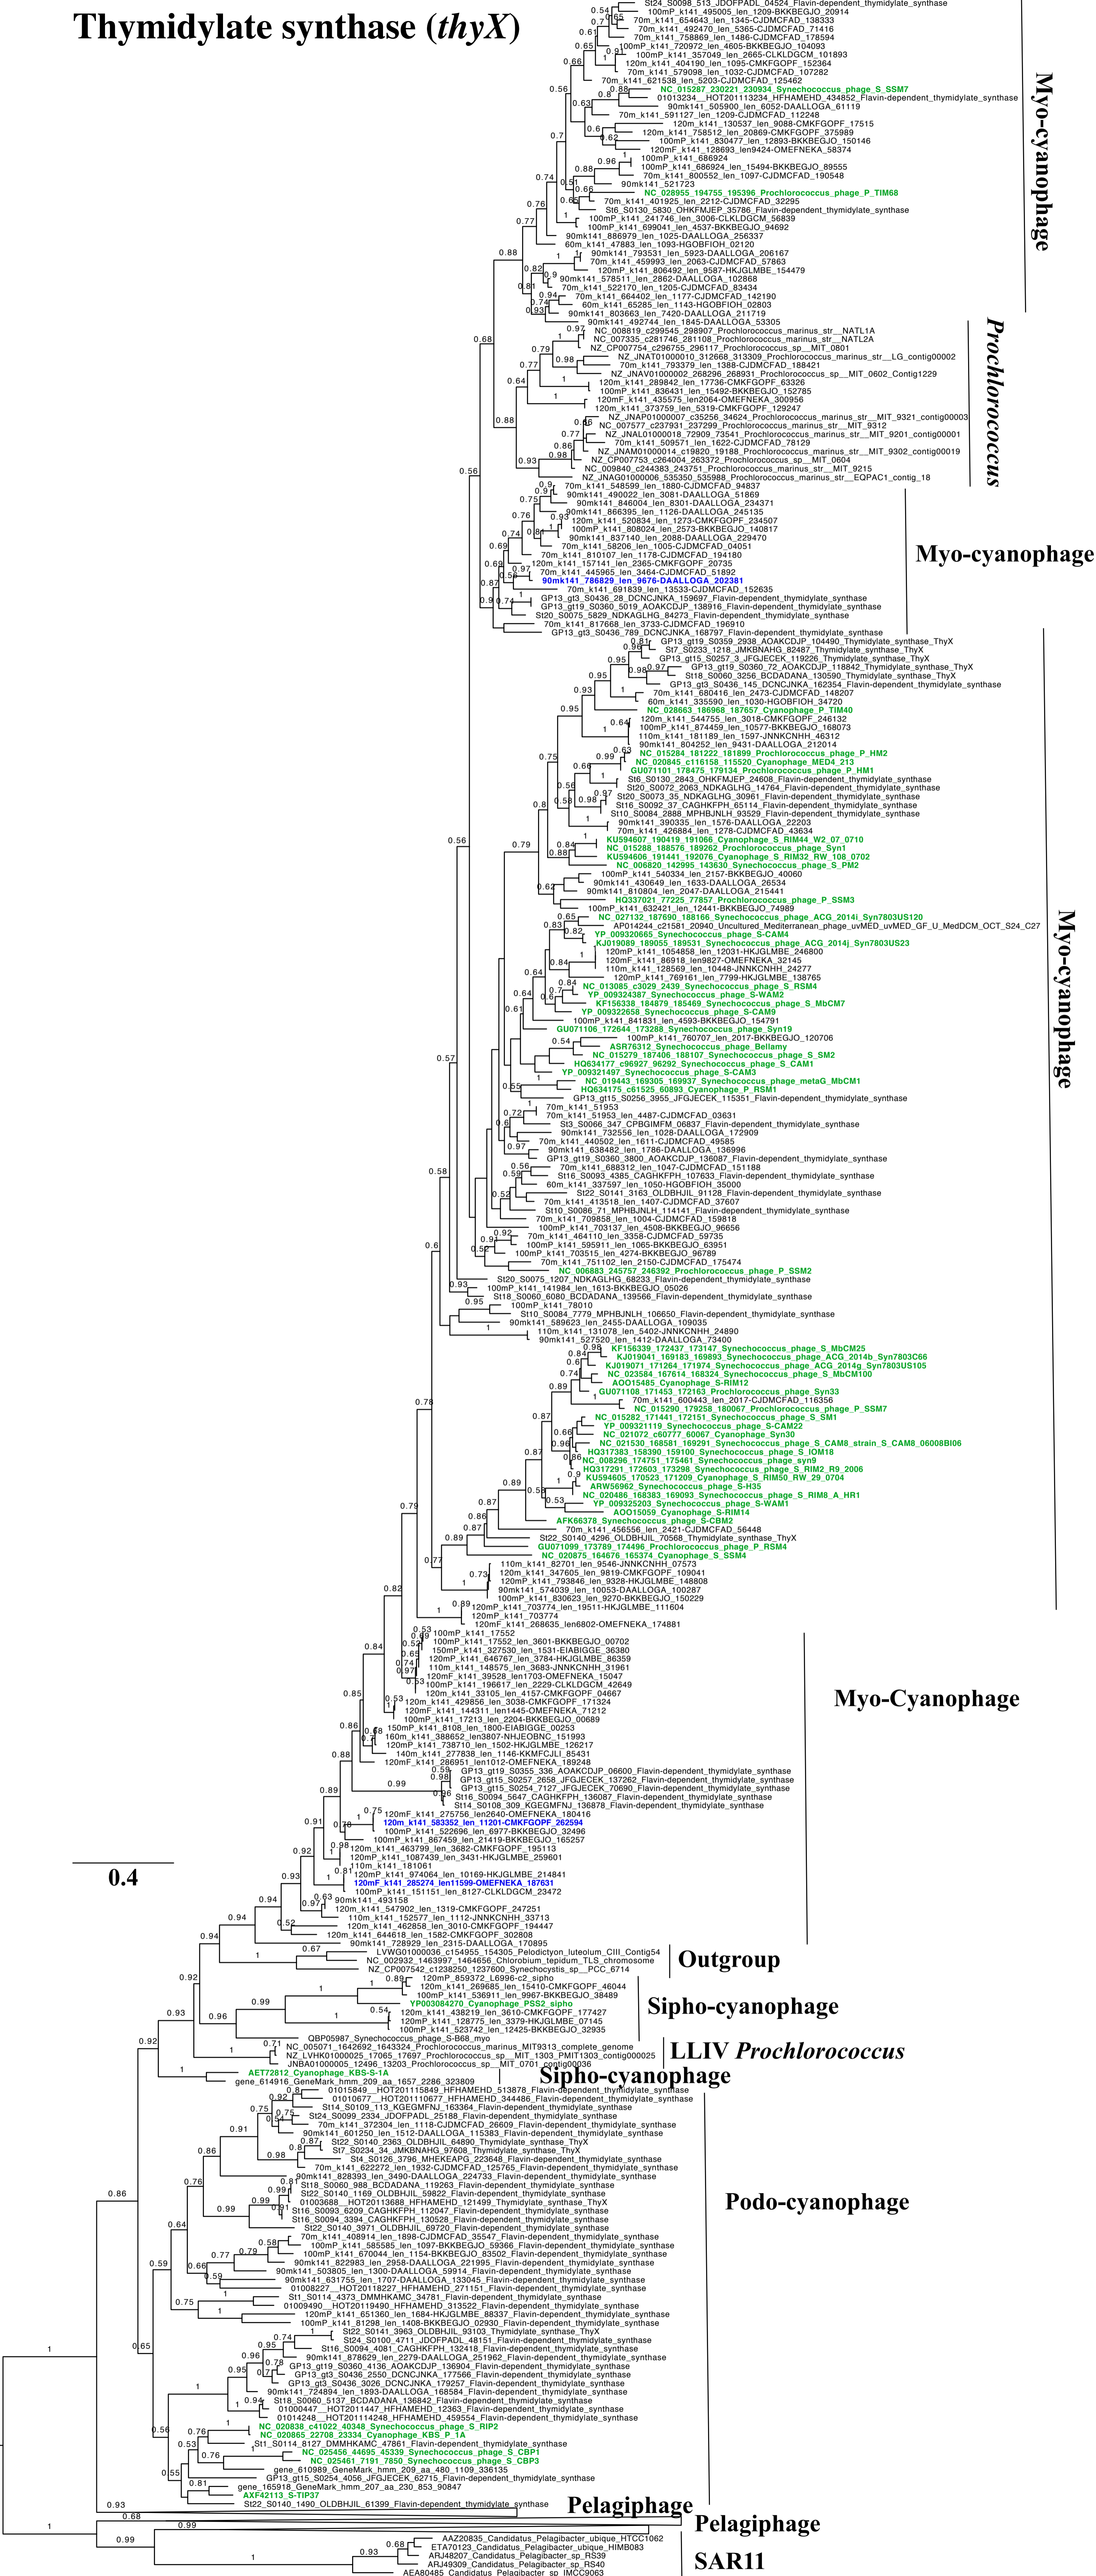

0.4

AA220835 Candidatus Pelagibacter ubique HTCC1062

ETA70123 Candidatus Pelagibacter ubique HMB083

ARJ49309 Candidatus Pelagibacter sp. RS4

ARJ49309 Candidatus Pelagibacter sp. RS4

AE80485 Candidatus Pelagibacter sp. IMCC9063



# Orotate phosphoribosyltransferase (*pyrE*)

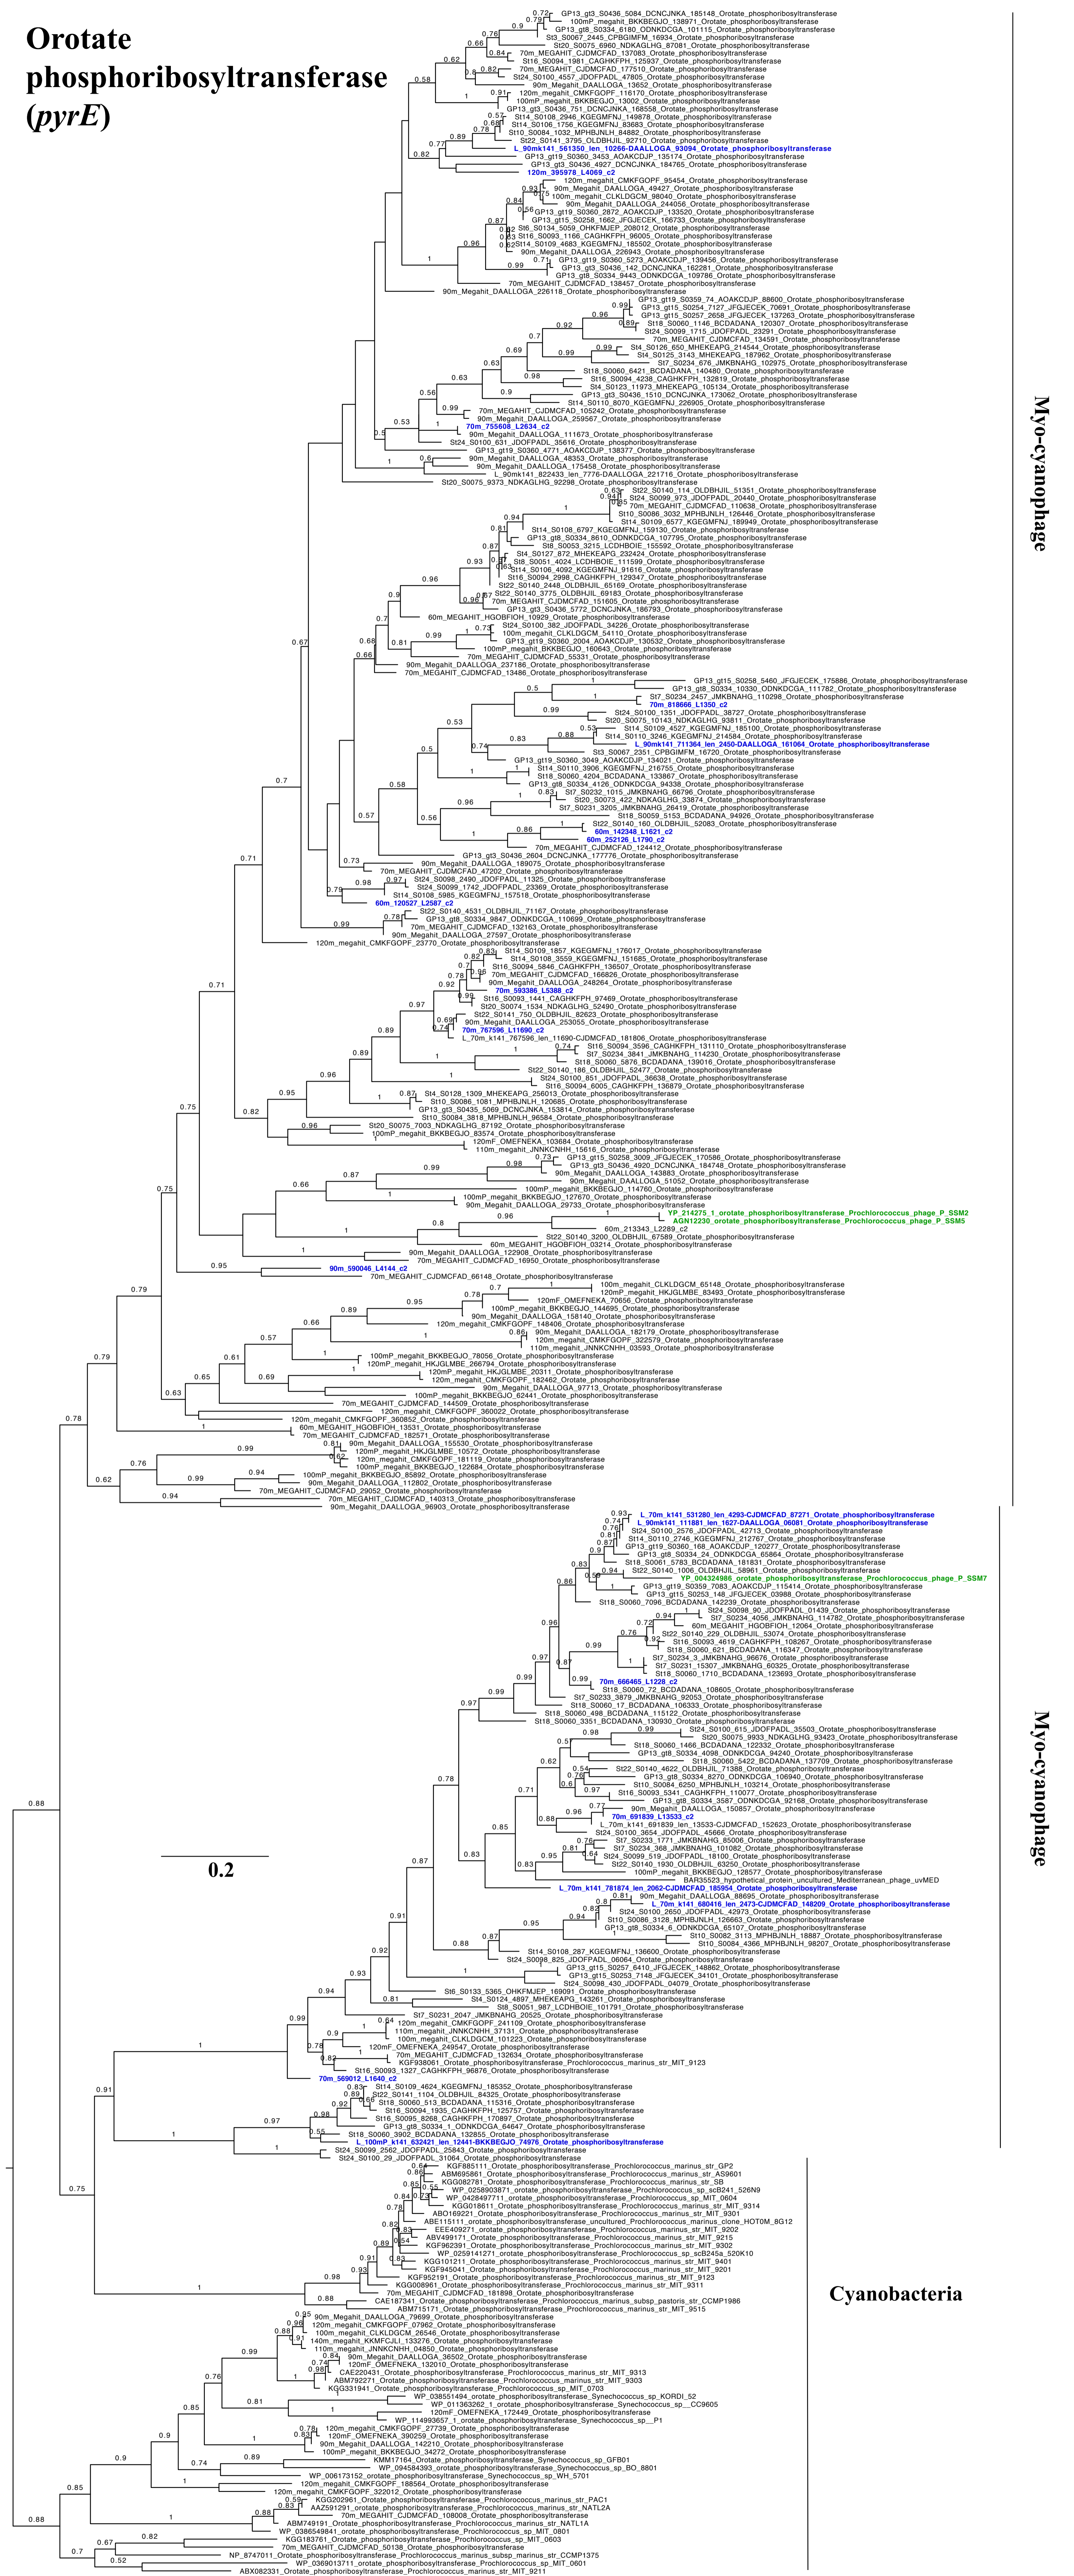

Mycobacterium

Mycobacterium

Cyanobacteria







# Phosphoribosyl-glycinamide formyltransferase (purN)

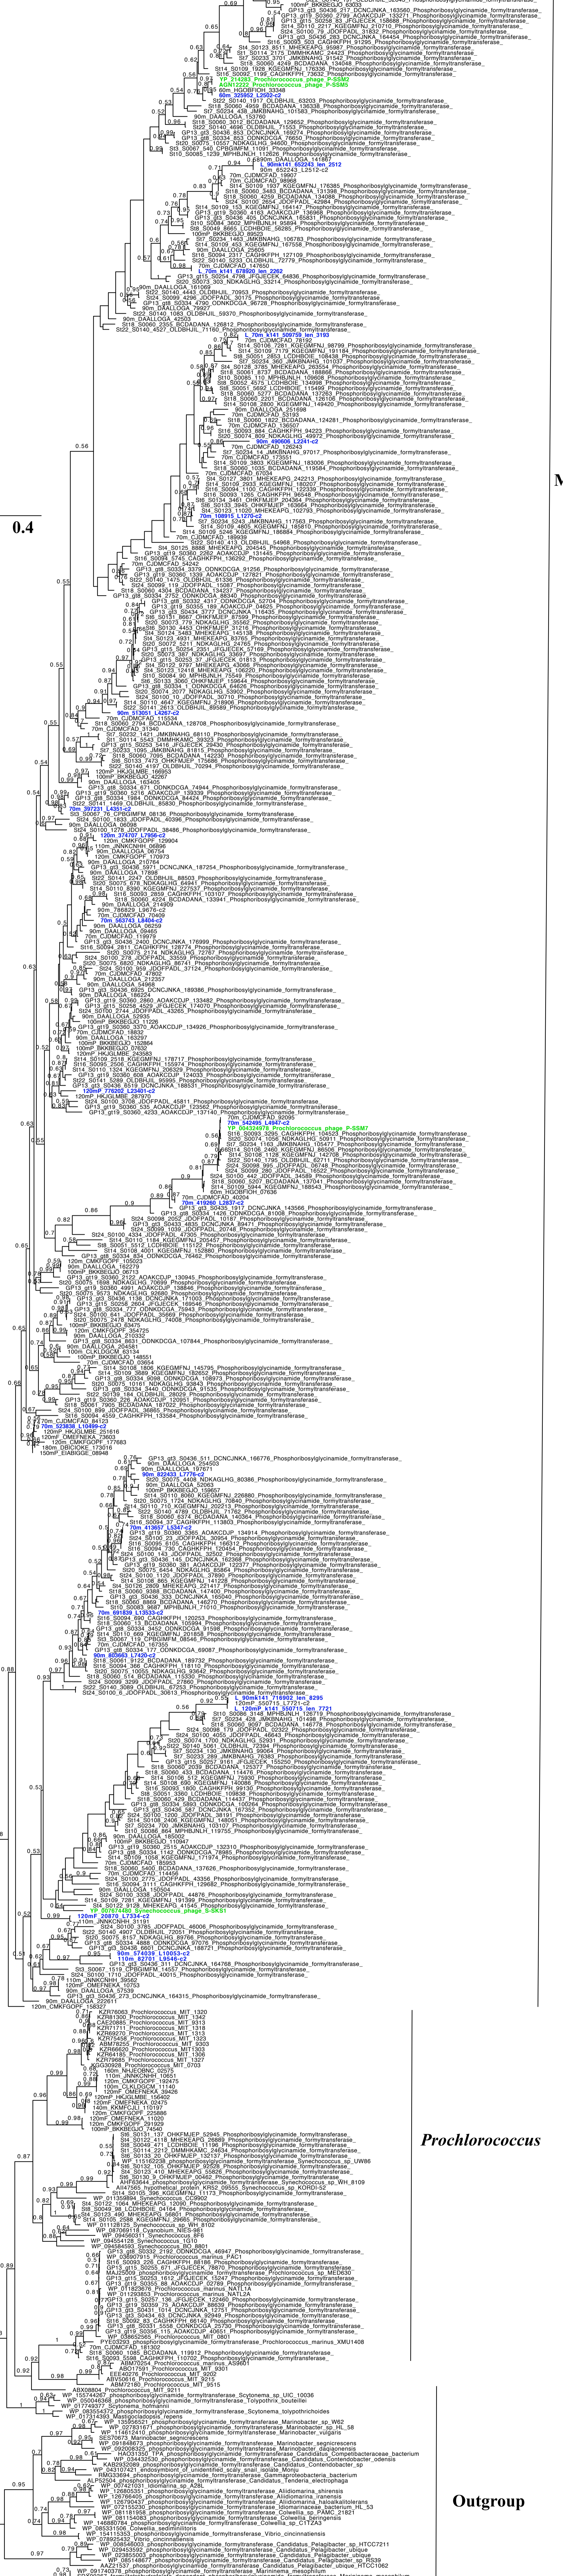

Myo-cyanophage

Prochlorococcus

Outgroup

0.4

0.86

0.87

0.88

0.89

0.9

0.91

0.92

0.93

0.94

0.95

0.96

0.97

0.98

0.99

1.0

1.0

1.0

1.0

1.0

1.0

1.0

1.0

1.0

1.0

1.0

1.0

1.0

1.0

1.0

1.0

1.0

1.0

1.0

1.0

1.0

1.0

1.0

1.0

1.0

1.0

1.0

1.0

1.0

1.0

1.0

1.0

1.0

1.0

1.0

1.0

1.0

1.0

1.0

1.0

1.0

1.0

1.0

1.0

1.0

1.0

1.0

1.0

1.0

1.0

1.0

1.0

1.0

1.0

1.0

1.0

1.0

1.0

1.0

1.0

1.0

1.0

1.0

1.0

1.0

1.0

1.0

1.0

1.0

1.0

1.0

1.0

1.0

1.0

1.0

1.0

1.0

1.0

1.0

1.0

1.0

1.0

1.0

1.0

1.0

1.0

1.0

1.0

1.0

1.0

1.0

1.0

1.0

1.0

1.0

1.0

1.0

1.0

1.0

1.0

1.0

1.0

1.0

1.0

1.0

1.0

1.0

1.0

1.0

1.0

1.0

1.0

1.0

1.0

1.0

1.0

1.0

1.0

1.0

1.0

1.0

1.0

1.0

1.0

1.0

1.0

1.0

1.0

1.0

1.0

1.0

1.0

1.0

1.0

1.0

1.0

1.0

1.0

1.0

1.0

1.0

1.0

1.0

1.0

1.0

1.0

1.0

1.0

1.0

1.0

1.0

1.0

1.0

1.0

1.0

1.0

1.0

1.0

1.0

1.0

1.0

1.0

1.0

1.0

1.0

1.0

1.0

1.0

1.0

1.0

1.0

1.0

1.0

1.0

1.0

1.0

1.0

1.0

1.0

1.0

1.0

1.0

1.0

1.0

1.0

1.0

1.0

1.0

1.0

1.0

1.0

1.0

1.0

1.0

1.0

1.0

1.0

1.0

1.0

1.0

1.0

1.0

1.0

1.0

1.0

1.0

1.0

1.0

1.0

1.0

1.0

1.0

1.0

1.0

1.0

1.0

1.0

1.0

1.0

1.0

1.0

1.0

1.0

1.0

1.0

1.0

1.0

1.0

1.0

1.0

1.0

1.0

1.0

1.0

1.0

1.0

1.0

1.0

1.0

1.0

1.0

1.0

1.0

1.0

1.0

1.0

1.0

1.0

1.0

1.0

1.0

1.0

1.0

1.0

1.0

1.0

1.0

1.0

1.0

1.0

1.0

1.0

1.0

1.0

1.0

1.0

1.0

1.0

1.0

1.0

1.0

1.0

1.0

1.0

1.0

1.0

1.0

1.0

1.0

1.0

1.0

1.0

1.0

1.0

1.0

1.0

1.0

1.0

1.0

1.0

1.0

1.0

1.0

1.0

1.0

1.0

1.0

1.0

1.0

1.0

1.0

1.0

1.0

1.0

1.0

1.0

1.0

1.0

1.0

1.0

1.0

1.0

1.0

1.0

1.0

1.0

1.0

1.0







# phoH

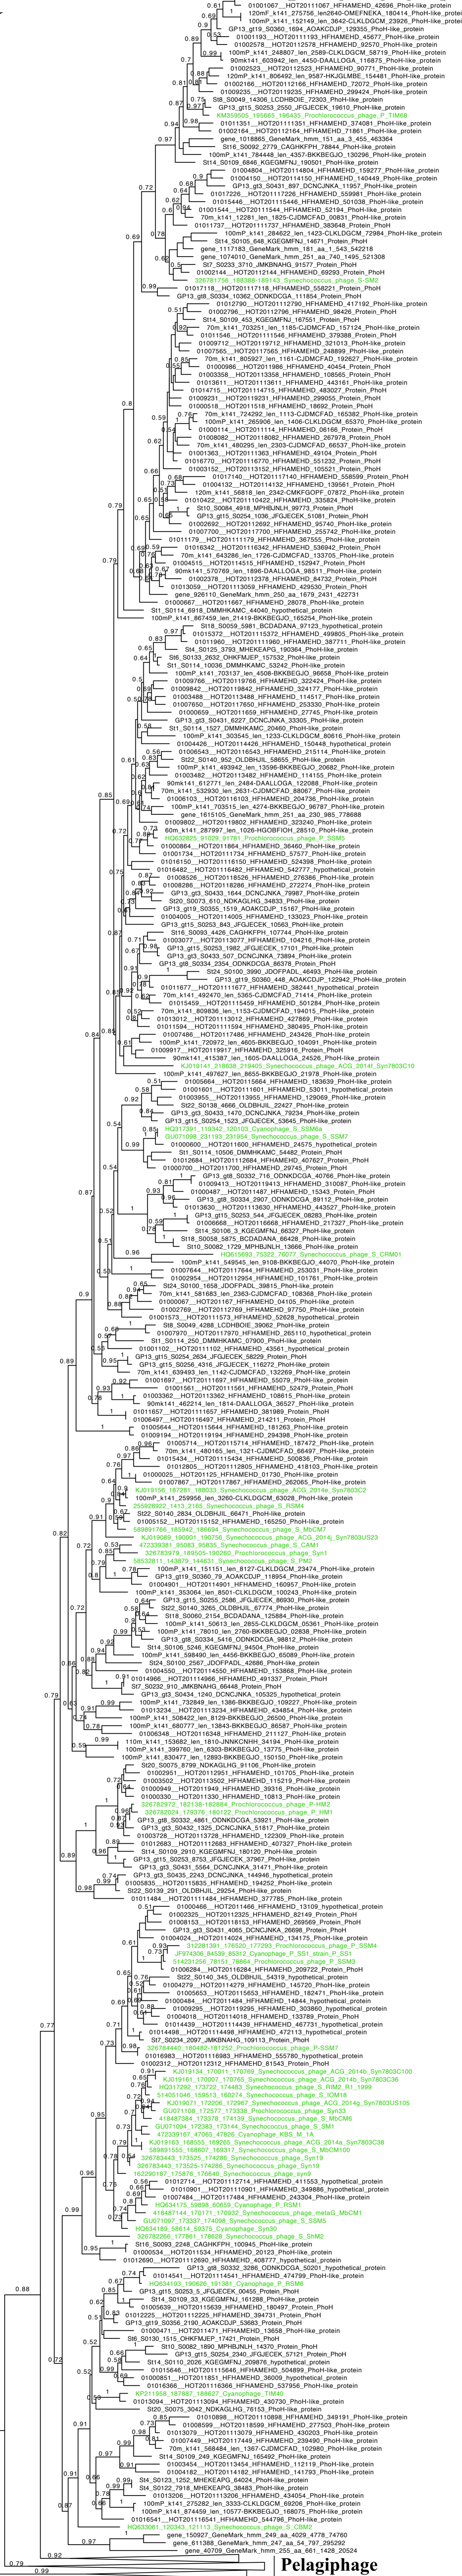

## Myo-cyanophage

## Pelagiphage

## Bacteria

## Eukaryotic Algae Virus

## Other Virus

0.3

0.91

0.94

0.97

0.98

0.91

0.8

0.86

0.89

0.91

0.97

0.91
