# Supplementary material for: Associations between picocyanobacterial ecotypes and cyanophage host genes across ocean basins and depth
Source: PeerJ. 2023 Feb 28;11:e14924. doi: 10.7717/peerj.14924 (PMC9983427; doi:10.7717/peerj.14924)
Supplement: Table S1 — Latitude and longitude, mixed layer depth, oxygen, temperature, salinity, and nitrate, nitrite, and phosphate concentrations. Samples were also characterized by depth regime and ocean regime. [file peerj-11-14924-s003.xlsx]

## Sheet: Metadata
Name	Depth(m)	latitude N	longitude E	Station	Month	Year	Ocean Region	Mixed layer depth (m)	Depth regime	Oxygen category	PO4	Nitrate	Nitrite	Temperature	Salinity	Oxygen umol/kg
HOT272_5m	5	22.75 N	202	Aloha	May	2015	North Pacific	20	Mixed layer	Oxic	0.1	0.08	NA	24.5717	35.0696	211.3
HOT272_25m	25	22.75 N	202	Aloha	May	2015	North Pacific	20	Mixed layer	Oxic	0.12	0.01	NA	24.4798	35.1579	211.5
HOT272_45m	45	22.75 N	202	Aloha	May	2015	North Pacific	20	Mixed layer	Oxic	0.07	0.01	NA	24.3947	35.1824	212.1
HOT272_75m	75	22.75 N	202	Aloha	May	2015	North Pacific	20	Chlorophyll Max	Oxic	0.07	0.03	NA	24.182	35.2186	212.6
HOT272_100m	100	22.75 N	202	Aloha	May	2015	North Pacific	20	Chlorophyll Max	Oxic	0.09	0.03	NA	23.6695	35.3327	213.1
HOT272_150m	150	22.75 N	202	Aloha	May	2015	North Pacific	20	Chlorophyll Max	Oxic	0.11	0.13	NA	22.6782	35.3671	206.7
HOT272_175m	175	22.75 N	202	Aloha	May	2015	North Pacific	20	Deep euphotic zone	Oxic	0.09	0.6	NA	21.8509	35.362	201.5
HOT272_200m	200	22.75 N	202	Aloha	May	2015	North Pacific	20	Deep euphotic zone	Oxic	0.15	1.6	NA	21.1607	35.3285	201.3
HOT272_225m	225	22.75 N	202	Aloha	May	2015	North Pacific	20	Deep euphotic zone	Oxic	0.24	2.73	NA	20.0321	35.1639	198.3
HOT272_250m	250	22.75 N	202	Aloha	May	2015	North Pacific	20	euphotic/mesopelagic transistion	Oxic	0.37	5.2	NA	18.5761	34.9346	193.7
HOT275_5m	5	22.75 N	202	Aloha	Aug	2015	North Pacific	26	Mixed layer	Oxic	0.05	0.02	NA	27.1344	35.3015	200.9
HOT275_25m	25	22.75 N	202	Aloha	Aug	2015	North Pacific	26	Mixed layer	Oxic	0.05	0.03	NA	27.0682	35.3074	201.8
HOT275_45m	45	22.75 N	202	Aloha	Aug	2015	North Pacific	26	Chlorophyll Max	Oxic	0.02	0.04	NA	24.6604	35.3683	225
HOT275_75m	75	22.75 N	202	Aloha	Aug	2015	North Pacific	26	Chlorophyll Max	Oxic	0.02	0.02	NA	22.1447	35.3435	225.6
HOT275_100m	100	22.75 N	202	Aloha	Aug	2015	North Pacific	26	Chlorophyll Max	Oxic	0.16	1.01	NA	20.7844	35.2241	216.7
HOT275_125m	125	22.75 N	202	Aloha	Aug	2015	North Pacific	26	Chlorophyll Max	Oxic	0.23	2.09	NA	19.5854	35.0576	202.4
HOT275_150m	150	22.75 N	202	Aloha	Aug	2015	North Pacific	26	Chlorophyll Max	Oxic	0.36	3.92	NA	18.3251	34.8688	197.4
HOT275_175m	175	22.75 N	202	Aloha	Aug	2015	North Pacific	26	Deep euphotic zone	Oxic	0.38	4.66	NA	16.8405	34.6812	196.7
HOT275_200m	200	22.75 N	202	Aloha	Aug	2015	North Pacific	26	Deep euphotic zone	Oxic	0.46	5.8	NA	15.25	34.4687	197.9
HOT275_225m	225	22.75 N	202	Aloha	Aug	2015	North Pacific	26	euphotic/mesopelagic transistion	Oxic	0.63	8.2	NA	13.6257	34.2732	198.2
HOT278_5m	5	22.75 N	202	Aloha	Nov	2015	North Pacific	56	Mixed layer	Oxic	0.04	0.03	NA	25.8664	35.194	205.4
HOT278_25m	25	22.75 N	202	Aloha	Nov	2015	North Pacific	56	Mixed layer	Oxic	0.04	0.04	NA	25.8713	35.1955	205
HOT278_45m	45	22.75 N	202	Aloha	Nov	2015	North Pacific	56	Mixed layer	Oxic	0.04	0.04	NA	25.8728	35.1957	205
HOT278_75m	75	22.75 N	202	Aloha	Nov	2015	North Pacific	56	Chlorophyll Max	Oxic	0.04	0.04	NA	24.7689	35.24	209.4
HOT278_100m	100	22.75 N	202	Aloha	Nov	2015	North Pacific	56	Chlorophyll Max	Oxic	0.08	0.2	NA	22.3806	35.2635	214.2
HOT278_125m	125	22.75 N	202	Aloha	Nov	2015	North Pacific	56	Chlorophyll Max	Oxic	0.13	1	NA	20.1533	35.128	208.6
HOT278_150m	150	22.75 N	202	Aloha	Nov	2015	North Pacific	56	Deep euphotic zone	Oxic	0.19	1.88	NA	18.633	34.9611	204.1
HOT278_175m	175	22.75 N	202	Aloha	Nov	2015	North Pacific	56	Deep euphotic zone	Oxic	0.28	3.28	NA	17.0894	34.7578	205.1
HOT278_200m	200	22.75 N	202	Aloha	Nov	2015	North Pacific	56	euphotic/mesopelagic transistion	Oxic	0.28	3.28	NA	15.7476	34.5682	203.1
HOT278_225m	225	22.75 N	202	Aloha	Nov	2015	North Pacific	56	euphotic/mesopelagic transistion	Oxic	0.45	5.99	NA	14.0523	34.3489	202.6
ETNP_60m	60	17 01.95 N	253.47	St 136	April	2012	ETNP	36	Chlorophyll Max	Oxic	0.89441	7.6086	1.18943	22.2782	34.3498	125.407
ETNP_70m	70	18 01.95 N	253.47	St 136	April	2012	ETNP	36	Chlorophyll Max	Hypoxic	1.82449	17.1849	0.969163	19.5317	34.5182	49.9318
ETNP_90m	90	19 01.95 N	253.47	St 136	April	2012	ETNP	36	Deep euphotic zone	Suboxic	2.41444	23.6974	0.0660793	15.5062	34.6329	5.28627
ETNP_100m	100	20 01.95 N	253.47	St 136	April	2012	ETNP	36	ODZ	ODZ	2.55138	23.6746	0.0660793	14.7761	34.6678	0.9
ETNP_110m	110	21 01.95 N	253.47	St 136	April	2012	ETNP	36	ODZ	ODZ	2.61677	21.537	0.132159	13.9448	34.7374	0
ETNP_120m	120	22 01.95 N	253.47	St 136	April	2012	ETNP	36	ODZ	ODZ	2.62252	20.532	1.87225	13.7043	34.7535	0
ETSP_St9_80m	80	-12.9776	277.784	St 9	July	2013	ETSP	nd	Deep euphotic zone	Hypoxic	2.145	22	0.042	15.1029	34.9049	68.257
ETSP_St9_100m	100	-12.9776	277.784	St 9	July	2013	ETSP	nd	Deep euphotic zone	Hypoxic	2.38	25	0.04	13.7615	34.826	23.914
ETSP_St9_110m	110	-12.9776	277.784	St 9	July	2013	ETSP	nd	ODZ	ODZ	2.5	18	0.6	13.6513	34.8723	0
ETSP_St9_120m	120	-12.9776	277.784	St 9	July	2013	ETSP	nd	ODZ	ODZ	2.6	13	5	13.6136	34.9297	0
GA03_St1_30m	30	39.6924	290.187	St 1	Nov	2011	Western North Atlantic	30	Mixed layer	Oxic	0.078	0.57	0	19.569	35.082	226.3
GA03_St1_57m	57	39.6924	290.187	St 1	Nov	2011	Western North Atlantic	30	Chlorophyll Max	Oxic	0.42	4.81	0.17	18.637	35.432	189.6
GA03_St1_89m	89	39.6924	290.187	St 1	Nov	2011	Western North Atlantic	30	Deep euphotic zone	Oxic	0.79	13.7	0.01	15.814	36.035	142
GA03_St1_109m	109	39.6924	290.187	St 1	Nov	2011	Western North Atlantic	30	euphotic/mesopelagic transistion	Oxic	0.9	14.81	0	14.952	35.927	141.8
GA03_St10_41m	41	31.7501	295.831	BATS	Nov	2011	North Atlantic	75	Mixed layer	Oxic	0.03	0	0	24.13	36.587	209.4
GA03_St10_75m	75	31.7501	295.831	BATS	Nov	2011	North Atlantic	75	Mixed layer	Oxic	0	0	0.01	23.595	36.647	208.7
GA03_St10_89m	89	31.7501	295.831	BATS	Nov	2011	North Atlantic	75	Chlorophyll Max	Oxic	0	0	0.12	22.116	36.664	219.5
GA03_St10_109m	109	31.7501	295.831	BATS	Nov	2011	North Atlantic	75	Chlorophyll Max	Oxic	0.1	2.09	0.02	20.552	36.722	190.2
GA03_St10_182m	182	31.7501	295.831	BATS	Nov	2011	North Atlantic	75	euphotic/mesopelagic transistion	Oxic	0.05	2.14	0	18.481	36.591	202.1
GA03_St14_69m	69	27.583	310.367	St 14	Nov	2011	North Atlantic	53	Chlorophyll Max	Oxic	0	0	0	23.437	37.025	231.9
GA03_St14_99m	99	27.583	310.367	St 14	Nov	2011	North Atlantic	53	Chlorophyll Max	Oxic	0	0.01	0	21.882	37.042	213.8
GA03_St14_113m	113	27.583	310.367	St 14	Nov	2011	North Atlantic	53	Chlorophyll Max	Oxic	0	0.01	0.1	21.166	36.948	209.5
GA03_St14_133m	133	27.583	310.367	St 14	Nov	2011	North Atlantic	53	Chlorophyll Max	Oxic	0	0.14	0.07	20.306	36.831	206.2
GA03_St14_183m	183	27.583	310.367	St 14	Nov	2011	North Atlantic	53	Deep euphotic zone	Oxic	0.07	2.72	0	18.911	36.676	190.1
GA03_St16_39m	39	26.1363	315.174	St 16	Nov	2011	North Atlantic	68	Mixed layer	Oxic	0	0	0	25.15	37.386	206.2
GA03_St16_60m	60	26.1363	315.174	St 16	Nov	2011	North Atlantic	68	Mixed layer	Oxic	0	0	0	25.14	37.394	205.9
GA03_St16_89m	89	26.1363	315.174	St 16	Nov	2011	North Atlantic	68	Chlorophyll Max	Oxic	0	0.01	0	22.175	37.129	216.2
GA03_St16_110m	110	26.1363	315.174	St 16	Nov	2011	North Atlantic	68	Chlorophyll Max	Oxic	0	0.01	0.03	21.838	37.095	212.9
GA03_St16_135m	135	26.1363	315.174	St 16	Nov	2011	North Atlantic	68	Deep euphotic zone	Oxic	0	0.31	0.03	20.357	36.921	202.8
GA03_St16_187m	187	26.1363	315.174	St 16	Nov	2011	North Atlantic	68	euphotic/mesopelagic transistion	Oxic	0.1	3.06	0	18.979	36.719	185.6
GA03_St18_38m	38	24.1499	319.781	St 18	Dec	2011	North Atlantic	81	Mixed layer	Oxic	0	0	0	25.221	37.629	205.5
GA03_St18_65m	65	24.1499	319.781	St 18	Dec	2011	North Atlantic	81	Mixed layer	Oxic	0	0	0	25.225	37.631	205.4
GA03_St18_75m	75	24.1499	319.781	St 18	Dec	2011	North Atlantic	81	Mixed layer	Oxic	0	0	0	25.193	37.628	205.7
GA03_St18_113m	113	24.1499	319.781	St 18	Dec	2011	North Atlantic	81	Chlorophyll Max	Oxic	0	0.04	0.05	22.23	37.304	209.6
GA03_St18_184m	184	24.1499	319.781	St 18	Dec	2011	North Atlantic	81	Deep euphotic zone	Oxic	0.08	2.1	0	18.925	36.755	194.1
GA03_St18_233m	233	24.1499	319.781	St 18	Dec	2011	North Atlantic	81	euphotic/mesopelagic transistion	Oxic	0.19	4.21	0	18.129	36.599	190.9
GA03_St20_39m	39	22.3499	324.133	St 20	Dec	2011	North Atlantic	68	Mixed layer	Oxic	0	0	0	25.324	37.395	205
GA03_St20_74m	74	22.3499	324.133	St 20	Dec	2011	North Atlantic	68	Chlorophyll Max	Oxic	0	0	0	23.994	37.415	208
GA03_St20_99m	99	22.3499	324.133	St 20	Dec	2011	North Atlantic	68	Chlorophyll Max	Oxic	0	0.03	0.03	22.813	37.345	204
GA03_St20_134m	134	22.3499	324.133	St 20	Dec	2011	North Atlantic	68	Chlorophyll Max	Oxic	0.12	2.34	0.02	20.269	36.964	173
GA03_St20_183m	183	22.3499	324.133	St 20	Dec	2011	North Atlantic	68	Deep euphotic zone	Oxic	0.36	7.93	0	18.195	36.589	159
GA03_St20_234m	234	22.3499	324.133	St 20	Dec	2011	North Atlantic	68	euphotic/mesopelagic transistion	Oxic	0.5	8.95	0	17.353	36.442	170
GA03_St22_50m	50	19.4329	330.617	St 22	Dec	2011	North Atlantic	81	Mixed layer	Oxic	0	0	0	24.806	37.171	206.1
GA03_St22_74m	74	19.4329	330.617	St 22	Dec	2011	North Atlantic	81	Mixed layer	Oxic	0	0	0	24.807	37.169	205.9
GA03_St22_84m	84	19.4329	330.617	St 22	Dec	2011	North Atlantic	81	Chlorophyll Max	Oxic	0.01	0.04	0.03	23.235	37.093	206.3
GA03_St22_123m	123	19.4329	330.617	St 22	Dec	2011	North Atlantic	81	Deep euphotic zone	Oxic	0.56	9.19	0.01	19.517	36.663	139.7
GA03_St24_48m	48	17.3999	335.5	St 24	Dec	2011	North Atlantic	39	Chlorophyll Max	Oxic	0	0.03	0	24.678	36.806	206.7
GA03_St24_71m	71	17.3999	335.5	St 24	Dec	2011	North Atlantic	39	Chlorophyll Max	Oxic	0.13	0.05	0.11	20.199	36.477	207.6
GA03_St24_89m	89	17.3999	335.5	St 24	Dec	2011	North Atlantic	39	Chlorophyll Max	Oxic	0.58	2.8	0.03	19.688	36.588	181.4
GA03_St24_135m	135	17.3999	335.5	St 24	Dec	2011	North Atlantic	39	Deep euphotic zone	Oxic	0.75	13.66	0	17.806	36.4	128.8
GA03_St3_28m	28	38.6683	290.884	St 3	Nov	2011	Western North Atlantic	44	Mixed layer	Oxic	0.02	0	0	24.514	36.166	204.5
GA03_St3_61m	61	38.6683	290.884	St 3	Nov	2011	Western North Atlantic	44	Chlorophyll Max	Oxic	0.01	0.08	0.01	24.153	36.339	203.1
GA03_St3_86m	86	38.6683	290.884	St 3	Nov	2011	Western North Atlantic	44	Chlorophyll Max	Oxic	0.08	2.28	0.03	23.587	36.679	187.3
GA03_St3_108m	108	38.6683	290.884	St 3	Nov	2011	Western North Atlantic	44	Deep euphotic zone	Oxic	0.2	4.72	0	21.66	36.749	151.5
GA03_St3_135m	135	38.6683	290.884	St 3	Nov	2011	Western North Atlantic	44	Deep euphotic zone	Oxic	0.19	4.71	0	20.289	36.762	162.8
GA03_St3_186m	186	38.6683	290.884	St 3	Nov	2011	Western North Atlantic	44	euphotic/mesopelagic transistion	Oxic	0.18	3.63	0	18.946	36.642	187.6
GA03_St4_39m	39	38.3269	291.13	St 4	Nov	2011	Western North Atlantic	100	Mixed layer	Oxic	0	0	0	23.536	36.126	208
GA03_St4_65m	65	38.3269	291.13	St 4	Nov	2011	Western North Atlantic	100	Mixed layer	Oxic	0	0	0.03	23.545	36.128	207.7
GA03_St4_91m	91	38.3269	291.13	St 4	Nov	2011	Western North Atlantic	100	Mixed layer	Oxic	0	0	0	23.571	36.138	207.8
GA03_St4_111m	111	38.3269	291.13	St 4	Nov	2011	Western North Atlantic	100	Chlorophyll Max	Oxic	0	0.02	0.07	23.745	36.361	205.8
GA03_St4_135m	135	38.3269	291.13	St 4	Nov	2011	Western North Atlantic	100	Deep euphotic zone	Oxic	0.04	1.25	0.02	22.1	36.749	192.3
GA03_St4_184m	184	38.3269	291.13	St 4	Nov	2011	Western North Atlantic	100	euphotic/mesopelagic transistion	Oxic	0.11	2.72	0	20.158	36.693	190.3
GA03_St6_64m	64	37.5954	291.595	St 6	Nov	2011	Western North Atlantic	107	Mixed layer	Oxic	0	0	0.03	23.418	36.034	208.2
GA03_St6_89m	89	37.5954	291.595	St 6	Nov	2011	Western North Atlantic	107	Mixed layer	Oxic	0	0	0.14	23.609	36.007	203.7
GA03_St6_111m	111	37.5954	291.595	St 6	Nov	2011	Western North Atlantic	107	Chlorophyll Max	Oxic	0.03	0.16	0.08	23.379	36.081	203.9
GA03_St6_139m	139	37.5954	291.595	St 6	Nov	2011	Western North Atlantic	107	Deep euphotic zone	Oxic	0.23	3.97	0.01	20.507	36.156	176.8
GA03_St6_160m	160	37.5954	291.595	St 6	Nov	2011	Western North Atlantic	107	euphotic/mesopelagic transistion	Oxic	0.28	5.44	0	19.819	36.369	162.5
SPGT15_14m	14	-32.495	202.005	GT 15	June	2011	South Pacific	101	Mixed layer	Oxic	0.06	0.02	NA	19.0533	35.4502	220
SPGT15_31m	31	-32.495	202.005	GT 15	June	2011	South Pacific	101	Mixed layer	Oxic	0.06	0.02	NA	19.0535	35.4504	220
SPGT15_51m	51	-32.495	202.005	GT 15	June	2011	South Pacific	101	Mixed layer	Oxic	0.06	0.02	NA	19.0589	35.4511	220
SPGT15_76m	76	-32.495	202.005	GT 15	June	2011	South Pacific	101	Mixed layer	Oxic	0.06	0.02	NA	19.0608	35.4507	220
SPGT15_100m	100	-32.495	202.005	GT 15	June	2011	South Pacific	101	Mixed layer	Oxic	0.06	0.02	NA	18.9985	35.4503	219
SPGT15_202m	202	-32.495	202.005	GT 15	June	2011	South Pacific	101	Deep euphotic zone	Oxic	0.4	4.96	NA	15.1746	35.2315	197
SPGT19_15m	15	-32.5013	206.002	GT 19	June	2011	South Pacific	116	Mixed layer	Oxic	0.09	0.02	NA	18.0657	35.3016	224
SPGT19_32m	32	-32.5013	206.002	GT 19	June	2011	South Pacific	116	Mixed layer	Oxic	0.09	0.02	NA	18.0564	35.3013	224
SPGT19_51m	51	-32.5013	206.002	GT 19	June	2011	South Pacific	116	Mixed layer	Oxic	0.09	0.02	NA	18.0581	35.3012	223
SPGT19_77m	77	-32.5013	206.002	GT 19	June	2011	South Pacific	116	Mixed layer	Oxic	0.09	0.02	NA	18.0584	35.3006	224
SPGT19_100m	100	-32.5013	206.002	GT 19	June	2011	South Pacific	116	Mixed layer	Oxic	0.09	0.02	NA	18.0537	35.2992	224
SPGT19_201m	201	-32.5013	206.002	GT 19	June	2011	South Pacific	116	Deep euphotic zone	Oxic	0.4	5.45	NA	14.8498	35.2446	194
SPGT3_16m	16	-32.4937	190.005	GT 3	June	2011	South Pacific	99	Mixed layer	Oxic	0.07	0.02	NA	19.3417	35.516	221
SPGT3_32m	32	-32.4937	190.005	GT 3	June	2011	South Pacific	99	Mixed layer	Oxic	0.07	0.02	NA	19.3383	35.5154	220
SPGT3_51m	51	-32.4937	190.005	GT 3	June	2011	South Pacific	99	Mixed layer	Oxic	0.07	0.02	NA	19.2491	35.5191	221
SPGT3_75m	75	-32.4937	190.005	GT 3	June	2011	South Pacific	99	Mixed layer	Oxic	0.08	0.02	NA	19.041	35.5311	222
SPGT3_103m	103	-32.4937	190.005	GT 3	June	2011	South Pacific	99	Chlorophyll Max	Oxic	0.09	0.07	NA	18.4759	35.5021	223
SPGT3_203m	203	-32.4937	190.005	GT 3	June	2011	South Pacific	99	Deep euphotic zone	Oxic	0.57	7.27	NA	14.2835	35.2656	194
SPGT8_15m	15	-32.4957	195.008	GT 8	June	2011	South Pacific	103	Mixed layer	Oxic	0.06	0.02	NA	19.3432	35.4181	220
SPGT8_28m	28	-32.4957	195.008	GT 8	June	2011	South Pacific	103	Mixed layer	Oxic	0.06	0.02	NA	19.3432	35.4181	220
SPGT8_50m	50	-32.4957	195.008	GT 8	June	2011	South Pacific	103	Mixed layer	Oxic	0.06	0.02	NA	19.26	35.4364	220
SPGT8_75m	75	-32.4957	195.008	GT 8	June	2011	South Pacific	103	Mixed layer	Oxic	0.06	0.02	NA	19.3228	35.4826	220
SPGT8_100m	100	-32.4957	195.008	GT 8	June	2011	South Pacific	103	Mixed layer	Oxic	0.05	0.02	NA	19.3055	35.481	219
SPGT8_204m	204	-32.4957	195.008	GT 8	June	2011	South Pacific	103	Deep euphotic zone	Oxic	0.35	1.42	NA	15.5263	35.2277	202
GA03_St7_33m	33	24.0001	338.002	St 7	Oct	2010	Eastern North Atlantic	37	Mixed layer	Oxic	0.08	0.01	0	25.66	36.72	206.9
GA03_St7_57m	57	24.0001	338.002	St 7	Oct	2010	Eastern North Atlantic	37	Chlorophyll Max	Oxic	0.1	0.07	0.05	22.8	36.92	219.4
GA03_St7_72m	72	24.0001	338.002	St 7	Oct	2010	Eastern North Atlantic	37	Chlorophyll Max	Oxic	0.07	0.05	0.19	22.81	36.92	213.2
GA03_St7_151m	151	24.0001	338.002	St 7	Oct	2010	Eastern North Atlantic	37	Deep euphotic zone	Oxic	0.96	15.32	0.01	17.09	36.26	103.2
GA03_St7_201m	201	24.0001	338.002	St 7	Oct	2010	Eastern North Atlantic	37	euphotic/mesopelagic transistion	Oxic	0.94	15.15	0.01	16.34	36.2	115.1
GA03_St8_31m	31	35.4162	293.457	St 8	Nov	2011	North Atlantic	90	Mixed layer	Oxic	0.01	0	0	23.075	36.352	210.4
GA03_St8_68m	68	35.4162	293.457	St 8	Nov	2011	North Atlantic	90	Mixed layer	Oxic	0.01	0	0	23.074	36.351	210.4
GA03_st8_111m	111	35.4162	293.457	St 8	Nov	2011	North Atlantic	90	Deep euphotic zone	Oxic	0.07	1.88	0.04	21.144	36.74	189.1
GA03_st8_135m	135	35.4162	293.457	St 8	Nov	2011	North Atlantic	90	Deep euphotic zone	Oxic	0.07	2.17	0	20.021	36.719	193.9
GA03_St8_186m	186	35.4162	293.457	St 8	Nov	2011	North Atlantic	90	euphotic/mesopelagic transistion	Oxic	0.15	3.57	0	18.68	36.615	192.7
Med_15	15	37.3536	-0.286194	Med-Oct_2015	Oct	2015	Mediterranean	unknown	Mixed layer	Oxic	0.06	0.2	NA	22.9	37.82	221.653
Med_30	30	37.3536	-0.286194	Med-Oct_2015	Oct	2015	Mediterranean	unknown	Chlorophyll Max	Oxic	0.07	0.21	NA	18.4	38	274.174
Med_60	60	37.3536	-0.286194	Med-Oct_2015	Oct	2015	Mediterranean	unknown	Chlorophyll Max	Oxic	0.08	0.23	NA	14.5	38.16	239.472
Med_75	75	37.3536	-0.286194	Med-Oct_2015	Oct	2015	Mediterranean	unknown	Deep euphotic zone	Oxic	0.12	5.79	NA	14	38.2	223.841
Med_90	90	37.3536	-0.286194	Med-Oct_2015	Oct	2015	Mediterranean	unknown	Deep euphotic zone	Oxic	0.22	6.23	NA	13.8	38.26	215.087
