# Supplementary material for: Associations between picocyanobacterial ecotypes and cyanophage host genes across ocean basins and depth
Source: PeerJ. 2023 Feb 28;11:e14924. doi: 10.7717/peerj.14924 (PMC9983427; doi:10.7717/peerj.14924)
Supplement: Table S2 — The abundance of each Prochlorococcus ecotype and total Synechococcus both as normalized ITS reads and as proportions for each sample. [file peerj-11-14924-s004.xlsx]

## Sheet: ITS_ecotypes
Name	Depth(m)	latitude N	longitude E	Station	Month	Year	HLI normalized reads	HLII normalized reads	LLI normalized reads	LLII normalized reads	NC1 normalized reads	LLIV normalized reads	LLV normalized reads	Syn normalized reads	Total Pro normalized reads		HLI proportion	HLII proportion	LLI proportion	LLII proportion	NC1 proportion	LLIV proportion	LLV proportion	Syn proportion	Total Pro proportion
HOT272_5m	5	22.75 N	202	Aloha	May	2015	2.40686	169.238	0.621495	1.55374	1.08762	0	0	2.50676	176.803		0.0134229	0.943828	0.00346603	0.00866508	0.00606556	0	0	0.01398	0.98602
HOT272_25m	25	22.75 N	202	Aloha	May	2015	2.99284	168.421	0.77094	0.77094	2.05584	0.21415	0	1.79288	177.57		0.016686	0.938995	0.00429822	0.00429822	0.0114619	0.00119395	0	0.00999585	0.990004
HOT272_45m	45	22.75 N	202	Aloha	May	2015	3.19963	188.719	0.390116	0.877762	1.17035	0	0	3.48723	197.571		0.0159139	0.938626	0.00194031	0.0043657	0.00582093	0	0	0.0173444	0.982656
HOT272_75m	75	22.75 N	202	Aloha	May	2015	2.92167	211.941	1.23001	0.717508	0.92251	0	0	1.78781	221.316		0.0130956	0.949966	0.0055132	0.00321603	0.0041349	0	0	0.00801337	0.991987
HOT272_100m	100	22.75 N	202	Aloha	May	2015	3.9753	264.193	4.81023	1.34687	0.769637	0.0801706	0	2.68478	282.522		0.0139383	0.926319	0.0168658	0.00472241	0.00269852	0.000281096	0	0.00941345	0.990587
HOT272_125m	125	22.75 N	202	Aloha	May	2015	1.82117	119.315	59.4443	10.0849	5.82369	0.828574	0	1.79616	199.102		0.00906515	0.593907	0.295893	0.0501993	0.0289883	0.00412435	0	0.00894067	0.991059
HOT272_150m	150	22.75 N	202	Aloha	May	2015	0.38611	12.6304	47.0608	21.8066	24.8233	6.39258	0	2.33019	113.112		0.00334463	0.10941	0.407659	0.188897	0.215029	0.0553749	0	0.020185	0.979815
HOT272_175m	175	22.75 N	202	Aloha	May	2015	0	2.25654	21.5123	14.8631	17.9921	3.09647	0	1.36442	59.7205		0	0.036941	0.352171	0.243318	0.294543	0.0506912	0	0.0223364	0.977664
HOT272_200m	200	22.75 N	202	Aloha	May	2015	1.8052	0.538584	2.17827	0.777955	1.7115	0.226903	0	0.305302	5.52298		0.309731	0.0924087	0.373742	0.133479	0.293654	0.0389314	0	0.0523828	0.947617
HOT272_225m	225	22.75 N	202	Aloha	May	2015	0	0.278654	1.449	1.288	0.7245	0.234792	0	0.21061	3.97495		0	0.0665751	0.346191	0.307725	0.173095	0.0560957	0	0.0503184	0.949682
HOT272_250m	250	22.75 N	202	Aloha	May	2015	0	0.119541	0.362609	0.155404	0.310808	0.0647516	0	0.112939	1.01311		0	0.10616	0.322018	0.138008	0.276015	0.0575032	0	0.100296	0.899704
HOT275_5m	5	22.75 N	202	Aloha	Aug	2015	3.10295	205.977	0.256116	0.384174	0.512232	0	0	1.50766	210.232		0.0146545	0.972782	0.00120958	0.00181437	0.00241916	0	0	0.00712035	0.99288
HOT275_25m	25	22.75 N	202	Aloha	Aug	2015	3.944	188.326	0.71211	0.854532	1.56664	0.0593425	0	2.11149	195.462		0.0199621	0.953192	0.00360427	0.00432513	0.0079294	0.000300356	0	0.0106871	0.989313
HOT275_45m	45	22.75 N	202	Aloha	Aug	2015	9.61879	217.921	0.273321	0.683302	1.09328	0	0	1.07263	229.589		0.0417008	0.944762	0.00118494	0.00296235	0.00473976	0	0	0.0046502	0.99535
HOT275_75m	75	22.75 N	202	Aloha	Aug	2015	19.7847	180.167	0.729649	0.121608	0.972865	0.20268	0	2.49226	201.979		0.0967605	0.881138	0.00356847	0.000594745	0.00475796	0.000991242	0	0.0121888	0.987811
HOT275_100m	100	22.75 N	202	Aloha	Aug	2015	2.42781	20.0699	144.622	9.67887	5.47067	0.409131	0	1.10098	182.678		0.0132105	0.109207	0.786933	0.0526657	0.0297676	0.00222621	0	0.00599079	0.994009
HOT275_150m	150	22.75 N	202	Aloha	Aug	2015	0.217363	0.65209	1.88382	7.72364	15.2589	3.53215	0	0.821431	29.268		0.00722392	0.0216717	0.0626073	0.25669	0.507119	0.117389	0	0.0272997	0.9727
HOT275_175m	175	22.75 N	202	Aloha	Aug	2015	0	0.12009	0.416313	1.24894	2.18564	1.30098	0	0.226915	5.27196		0	0.0218391	0.0757087	0.227126	0.397471	0.23659	0	0.0412656	0.958734
HOT275_200m	200	22.75 N	202	Aloha	Aug	2015	0	0.174533	0	0.151262	0.831939	0.22059	0	0.197871	1.37832		0	0.11073	0	0.0959664	0.527815	0.139951	0	0.125537	0.874463
HOT275_225m	225	22.75 N	202	Aloha	Aug	2015	0	0	0	0.0837912	0.0837912	0.139652	0	0.146147	0.307234		0	0	0	0.184814	0.184814	0.308023	0	0.32235	0.67765
HOT278_5m	5	22.75 N	202	Aloha	Nov	2015	7.06734	196.119	0.765628	0.382814	0	0	0	1.16847	204.334		0.0343905	0.954335	0.00372563	0.00186282	0	0	0	0.00568592	0.994314
HOT278_25m	25	22.75 N	202	Aloha	Nov	2015	7.374	208.995	0.672715	0.672715	2.01815	0	0	1.02667	219.732		0.033403	0.94671	0.00304729	0.00304729	0.00914186	0	0	0.00465066	0.995349
HOT278_45m	45	22.75 N	202	Aloha	Nov	2015	4.55161	182.064	0.956297	0.358611	1.55398	0	0	1.14672	189.485		0.0238765	0.955059	0.00501647	0.00188118	0.00815176	0	0	0.00601539	0.993985
HOT278_75m	75	22.75 N	202	Aloha	Nov	2015	5.34608	101.343	51.9061	0.738638	1.20868	0	0	1.93248	160.543		0.032904	0.623746	0.319471	0.00454616	0.00743917	0	0	0.011894	0.988106
HOT278_100m	100	22.75 N	202	Aloha	Nov	2015	1.36412	10.0735	71.0253	6.00214	6.82062	0.303138	0	0.674131	95.5889		0.0141708	0.104646	0.737826	0.0623515	0.070854	0.00314906	0	0.00700301	0.992997
HOT278_125m	125	22.75 N	202	Aloha	Nov	2015	0	1.04075	14.6121	7.03545	9.01981	2.44287	0	0.511297	34.151		0	0.0300254	0.421556	0.202972	0.26022	0.0704762	0	0.0147508	0.985249
HOT278_150m	150	22.75 N	202	Aloha	Nov	2015	0.1046	0.1046	1.81307	2.17568	3.71679	0.83099	0	0.592937	8.74574		0.0112008	0.0112008	0.194146	0.232976	0.398	0.0889838	0	0.0634926	0.936507
HOT278_175m	175	22.75 N	202	Aloha	Nov	2015	0	0.382839	0.331794	0.580639	0.580639	0.241933	0	0.217016	2.11784		0	0.163967	0.142104	0.248683	0.248683	0.103618	0	0.0929462	0.907054
HOT278_200m	200	22.75 N	202	Aloha	Nov	2015	0	0.145939	0.505923	0.252961	0.505923	0.316202	0	0.0551515	1.72695		0	0.0818918	0.283891	0.141946	0.283891	0.177432	0	0.0309475	0.969053
HOT278_225m	225	22.75 N	202	Aloha	Nov	2015	0	0.257107	0	0	0	0.0464221	0	0.145744	0.303529		0	0.572274	0	0	0	0.103327	0	0.324399	0.675601
ETNP_60m	60	17 01.95 N	253.47	St 136	April	2012	0.721846	1.74446	18.2988	0.886267	1.22886	0	0	0.841105	22.8802		0.0304302	0.0735398	0.771407	0.0373616	0.0518039	0	0	0.0354577	0.964542
ETNP_70m	70	18 01.95 N	253.47	St 136	April	2012	0.510462	3.57323	19.1496	7.9	6.162	0.210667	0.79	0.551163	38.296		0.0131403	0.0919819	0.492948	0.203361	0.158622	0.00542297	0.0203361	0.014188	0.985812
ETNP_90m	90	19 01.95 N	253.47	St 136	April	2012	0.0804615	0.482769	3.20773	7.1128	12.3279	1.68522	10.4891	2.00686	35.7346		0.00213192	0.0127915	0.0849924	0.188461	0.32664	0.0446518	0.277919	0.0531739	0.946826
ETNP_100m	100	20 01.95 N	253.47	St 136	April	2012	0.153846	0.461538	0.533333	1.6	3.14286	0.222222	7.16667	0.930233	13.5027		0.0106594	0.0319782	0.0369526	0.110858	0.217756	0.0153969	0.49655	0.0644521	0.935548
ETNP_110m	110	21 01.95 N	253.47	St 136	April	2012	0	0	0.221067	0.6632	3.07914	0.460556	7.55311	0.674767	12.1613		0	0	0.0172223	0.0516669	0.239882	0.0358798	0.588429	0.0525681	0.947432
ETNP_120m	120	22 01.95 N	253.47	St 136	April	2012	0	0.459077	0.248667	0.845467	4.103	0.808167	14.6713	1.32285	21.633		0	0.0199982	0.0108324	0.0368301	0.178734	0.0352052	0.63911	0.0576257	0.942374
ETSP_St9_80m	80	-12.9776	277.784	St 9	July	2013	0.205905	0.514762	0.758416	2.8106	2.94444	0.446127	0.855077	0.525237	8.6826		0.0223619	0.0559047	0.0823663	0.30524	0.319775	0.0484508	0.092864	0.0570423	0.942958
ETSP_St9_100m	100	-12.9776	277.784	St 9	July	2013	0	0	0	0.052095	0.10419	0.0217062	0.151944	0.227158	0.395054		0	0	0	0.0837255	0.167451	0.0348856	0.244199	0.365082	0.634918
ETSP_St9_110m	110	-12.9776	277.784	St 9	July	2013	0	0.0499739	0	0.0866215	0.433107	0.0541384	5.75672	0.415481	7.30091		0	0.00647633	0	0.0112256	0.0561282	0.00701603	0.746037	0.0538439	0.946156
ETSP_St9_120m	120	-12.9776	277.784	St 9	July	2013	0	0	0	0	0	0	0.519597	0.252462	0.519597		0	0	0	0	0	0	0.673002	0.326998	0.673002
GA03_St1_30m	30	39.6924	290.187	St 1	Nov	2011	0.257934	9.02769	1.78834	1.90011	5.02971	0.186286	0	9.21139	18.0439		0.00946362	0.331227	0.0656145	0.0697154	0.184541	0.00683484	0	0.337967	0.662033
GA03_St1_57m	57	39.6924	290.187	St 1	Nov	2011	0.270507	3.24609	1.05498	1.40664	1.28942	0.195366	0	3.16902	7.54414		0.02525	0.303	0.0984749	0.1313	0.120358	0.0182361	0	0.295806	0.704194
GA03_St1_89m	89	39.6924	290.187	St 1	Nov	2011	0	0	0.207084	0.621252	0.724794	0.17257	0	0.361193	1.93278		0	0	0.0902729	0.270819	0.315955	0.0752274	0	0.157453	0.842547
GA03_St1_109m	109	39.6924	290.187	St 1	Nov	2011	0	0	0.0654336	0.327168	0.294451	0.163584	0	0.256789	0.850636		0	0	0.0590862	0.295431	0.265888	0.147716	0	0.231879	0.768121
GA03_St10_41m	41	31.7501	295.831	BATS	Nov	2011	2.64609	124	1.91106	0.477766	0.764425	0.238883	0	7.6248	129.853		0.0192474	0.901964	0.0139009	0.00347522	0.00556035	0.00173761	0	0.0554621	0.944538
GA03_St10_75m	75	31.7501	295.831	BATS	Nov	2011	2.23157	122	1.64392	0.870311	0.967012	0.36263	0	6.45143	128.365		0.0165526	0.904932	0.0121937	0.00645551	0.00717279	0.0026898	0	0.0478534	0.952147
GA03_St10_89m	89	31.7501	295.831	BATS	Nov	2011	4.03747	36	25.0086	5.55746	4.11664	0.428816	0	0.897523	76.4441		0.0522031	0.465467	0.323352	0.071856	0.0532267	0.00554444	0	0.0116047	0.988395
GA03_St10_109m	109	31.7501	295.831	BATS	Nov	2011	0	1.7225	2.98567	11.2537	22.5074	3.58855	0	1.25182	43.4358		0	0.0385454	0.0668121	0.25183	0.50366	0.080303	0	0.0280127	0.971987
GA03_St10_182m	182	31.7501	295.831	BATS	Nov	2011	0	0.141669	1.35058	1.35058	4.54285	0.511582	0	0.267688	8.02004		0	0.0170938	0.162961	0.162961	0.548142	0.0617277	0	0.0322994	0.967701
GA03_St14_69m	69	27.583	310.367	St 14	Nov	2011	14.4978	167	0.69037	0.414222	0.552296	0.0575309	0	4.75633	183.908		0.0768441	0.885168	0.00365924	0.00219555	0.00292739	0.000304937	0	0.0252105	0.97479
GA03_St14_99m	99	27.583	310.367	St 14	Nov	2011	1.4879	34	58.028	2.11011	1.28951	0.341916	0	0.766755	99.5621		0.0148302	0.338885	0.578378	0.0210319	0.0128528	0.00340795	0	0.00764241	0.992358
GA03_St14_113m	113	27.583	310.367	St 14	Nov	2011	0.54729	13.4998	42.8467	9.32826	5.2175	0.922285	0	0.482591	74.0281		0.00734512	0.18118	0.575042	0.125194	0.0700235	0.0123779	0	0.0064768	0.993523
GA03_St14_133m	133	27.583	310.367	St 14	Nov	2011	0	2.59664	9.22673	7.20135	7.20135	1.21898	0	0.686902	28.5703		0	0.0887523	0.315367	0.24614	0.24614	0.0416643	0	0.0234781	0.976522
GA03_St14_183m	183	27.583	310.367	St 14	Nov	2011	0	0.145909	0.252909	1.01164	4.29945	0.421515	0	0.551401	6.13142		0	0.0218334	0.0378446	0.151379	0.643359	0.0630744	0	0.0825101	0.91749
GA03_St16_39m	39	26.1363	315.174	St 16	Nov	2011	1.17722	38	0	0.612153	0.510127	0.255064	0	15.4373	41.1673		0.0207972	0.671324	0	0.0108145	0.00901212	0.00450606	0	0.272722	0.727278
GA03_St16_60m	60	26.1363	315.174	St 16	Nov	2011	0.96677	40.4432	0.139645	0.558578	0.418934	0.465482	0	16.5016	42.0258		0.0165182	0.691013	0.00238597	0.00954387	0.0071579	0.00795322	0	0.281946	0.718054
GA03_St16_89m	89	26.1363	315.174	St 16	Nov	2011	4.1825	109	20.7895	0.852903	0.959515	0.133266	0	2.32441	136.704		0.0300837	0.784011	0.149534	0.00613472	0.00690156	0.00095855	0	0.0167189	0.983281
GA03_St16_110m	110	26.1363	315.174	St 16	Nov	2011	1.67469	27	67.2483	3.87041	4.64449	1.04823	0	0.970414	107.015		0.0155085	0.250033	0.622751	0.0358418	0.0430101	0.00970715	0	0.00898649	0.991014
GA03_St16_135m	135	26.1363	315.174	St 16	Nov	2011	0	1.38207	7.78564	6.88729	13.1757	2.66176	0	1.04458	32.8906		0	0.0407266	0.229427	0.202954	0.38826	0.0784365	0	0.0307818	0.969218
GA03_St16_187m	187	26.1363	315.174	St 16	Nov	2011	0	0.0756008	0	0.0655207	0.131041	0.0273003	0	0.0285701	0.233943		0	0.287989	0	0.249591	0.499181	0.103996	0	0.108833	0.891167
GA03_St18_38m	38	24.1499	319.781	St 18	Dec	2011	2.29658	120	0.199037	0.696629	1.49278	0.165864	0	14.8844	124.732		0.0164492	0.859496	0.0014256	0.00498958	0.010692	0.001188	0	0.106609	0.893391
GA03_St18_65m	65	24.1499	319.781	St 18	Dec	2011	2.42163	124	0.149911	0.299821	0.149911	0.374776	0	17.4532	127.741		0.0166786	0.854028	0.00103248	0.00206496	0.00103248	0.00258121	0	0.120206	0.879794
GA03_St18_75m	75	24.1499	319.781	St 18	Dec	2011	2.33798	84	0.0653628	0.261451	0.392177	0.245111	0	1.31106	87.5447		0.0263121	0.945353	0.000735606	0.00294242	0.00441364	0.00275852	0	0.0147549	0.985245
GA03_St18_113m	113	24.1499	319.781	St 18	Dec	2011	1.94624	28	52.1016	14.5247	15.2744	2.57697	0	1.26669	117.059		0.0164481	0.236635	0.440323	0.122752	0.129087	0.0217786	0	0.0107051	0.989295
GA03_St18_184m	184	24.1499	319.781	St 18	Dec	2011	0	0.250183	0.650476	1.40937	2.81873	0.632408	0	0.614549	6.19482		0	0.0367411	0.0955268	0.206975	0.413949	0.0928732	0	0.0902506	0.909749
GA03_St18_233m	233	24.1499	319.781	St 18	Dec	2011	0	0.119675	0.103718	0.726029	0.726029	0.129648	0	0.180904	1.90882		0	0.0572684	0.0496326	0.347428	0.347428	0.0620408	0	0.0865686	0.913431
GA03_St20_39m	39	22.3499	324.133	St 20	Dec	2011	5.16116	190	0.35784	0.35784	1.07352	0	0	2.49656	197.294		0.0258329	0.950996	0.00179108	0.00179108	0.00537323	0	0	0.0124959	0.987504
GA03_St20_74m	74	22.3499	324.133	St 20	Dec	2011	13.3925	198	2.69445	0.207266	2.27992	0.0863607	0	3.07283	217.364		0.0607544	0.898215	0.0122232	0.000940247	0.0103427	0.00039177	0	0.0139397	0.98606
GA03_St20_99m	99	22.3499	324.133	St 20	Dec	2011	1.28053	22	60.3728	9.43325	10.987	1.94214	0	2.22604	108.534		0.0115614	0.198628	0.545079	0.0851687	0.0991964	0.0175347	0	0.0200979	0.979902
GA03_St20_134m	134	22.3499	324.133	St 20	Dec	2011	0	0.533327	2.86574	6.10126	10.8159	3.35107	0	0.725573	24.2219		0	0.021378	0.114871	0.244564	0.433545	0.134325	0	0.029084	0.970916
GA03_St20_183m	183	22.3499	324.133	St 20	Dec	2011	0	0.200495	0	0	0.695048	0.0362004	0	0.0757683	0.931743		0	0.199	0	0	0.689866	0.0359305	0	0.0752034	0.924797
GA03_St20_234m	234	22.3499	324.133	St 20	Dec	2011	0	0	0	0.184336	0.184336	0.0384034	0	0.0401896	0.407076		0	0	0	0.412141	0.412141	0.0858626	0	0.0898562	0.910144
GA03_St22_50m	50	19.4329	330.617	St 22	Dec	2011	5.99005	233	0.988833	0.247208	0.618021	0	0	1.13184	241.456		0.0246923	0.960477	0.00407619	0.00101905	0.00254762	0	0	0.00466569	0.995334
GA03_St22_74m	74	19.4329	330.617	St 22	Dec	2011	5.05609	235	2.44873	1.03105	2.06209	0	0	1.79834	246.132		0.0203932	0.947845	0.00987668	0.0041586	0.00831721	0	0	0.00725338	0.992747
GA03_St22_84m	84	19.4329	330.617	St 22	Dec	2011	1.89878	39	50.1912	9.32514	8.22807	0.628533	0	0.896955	111.106		0.016953	0.348205	0.448123	0.0832579	0.0734628	0.00561175	0	0.0080083	0.991992
GA03_St22_123m	123	19.4329	330.617	St 22	Dec	2011	0.211166	0.211166	1.46409	2.01312	4.57527	0.686291	0	0.319205	10.048		0.0203687	0.0203687	0.141223	0.194182	0.441322	0.0661982	0	0.0307899	0.96921
GA03_St24_48m	48	17.3999	335.5	St 24	Dec	2011	3.47063	129	20.721	1.44824	3.7877	0.185672	0	3.69184	159.372		0.0212839	0.791101	0.127073	0.00888142	0.0232283	0.00113864	0	0.0226405	0.97736
GA03_St24_71m	71	17.3999	335.5	St 24	Dec	2011	0.363086	9.92436	28.8452	7.13263	16.0484	1.70449	0	1.87524	65.5431		0.00538557	0.147206	0.427854	0.105797	0.238042	0.0252823	0	0.027815	0.972185
GA03_St24_89m	89	17.3999	335.5	St 24	Dec	2011	0	2.62927	10.9138	11.7533	20.1485	3.69788	0	0.941322	51.0616		0	0.05056	0.209868	0.226012	0.387449	0.0711092	0	0.0181013	0.981899														St 6
GA03_St24_135m	135	17.3999	335.5	St 24	Dec	2011	0	0.353857	0.102225	0	0.408902	0	0	0.26745	0.96721		0	0.286603	0.0827964	0	0.331186	0	0	0.216619	0.783381
GA03_St3_28m	28	38.6683	290.884	St 3	Nov	2011	2.21242	63	0.426096	1.27829	0.426096	0.26631	0	10.3118	68.4908		0.0280755	0.799466	0.00540713	0.0162214	0.00540713	0.00337946	0	0.130856	0.869144
GA03_St3_61m	61	38.6683	290.884	St 3	Nov	2011	0.426497	8.74319	0.739261	0.369631	0.184815	0.0770064	0	3.70705	10.1139		0.0308587	0.632604	0.0534885	0.0267442	0.0133721	0.00557171	0	0.26822	0.73178
GA03_St3_86m	86	38.6683	290.884	St 3	Nov	2011	0	6.54563	1.95005	1.41822	7.80021	1.03412	0	1.23682	18.7482		0	0.327526	0.0975756	0.070964	0.390302	0.0517446	0	0.0618872	0.938113
GA03_St3_108m	108	38.6683	290.884	St 3	Nov	2011	0	1.47085	1.27474	2.54948	7.64845	0.531142	0	1.66754	13.4747		0	0.0971361	0.0841846	0.168369	0.505108	0.0350769	0	0.110125	0.889875
GA03_St3_135m	135	38.6683	290.884	St 3	Nov	2011	0	0.11547	0	0	0.300221	0.250184	0	0.261821	0.665875		0	0.124469	0	0	0.32362	0.269684	0	0.282227	0.717773
GA03_St3_186m	186	38.6683	290.884	St 3	Nov	2011	0	0.243718	0	0	0.105611	0.0440046	0	0.0460513	0.393333		0	0.55468	0	0	0.240361	0.10015	0	0.104809	0.895191
GA03_St4_39m	39	38.3269	291.13	St 4	Nov	2011	0.940716	90.3087	0.452937	0.271762	2.8988	0.415192	0	23.1472	94.438		0.00800029	0.768028	0.00385199	0.0023112	0.0246527	0.00353099	0	0.196855	0.803145
GA03_St4_65m	65	38.3269	291.13	St 4	Nov	2011	1.62502	100	0.512126	0.896221	2.68866	0.320079	0	24.955	106.645		0.0123481	0.759876	0.00389153	0.00681017	0.0204305	0.0024322	0	0.189627	0.810373
GA03_St4_91m	91	38.3269	291.13	St 4	Nov	2011	1.49344	94.0865	2.15719	0.431437	0.719062	0.419453	0	10.4724	97.9575		0.0137733	0.867718	0.0198948	0.00397895	0.00663159	0.00386843	0	0.0965821	0.903418
GA03_St4_111m	111	38.3269	291.13	St 4	Nov	2011	0.725625	32.2903	0.628875	0.628875	0.157219	0.196524	0	3.42774	33.9018		0.0194384	0.865007	0.0168466	0.0168466	0.00421164	0.00526456	0	0.0918236	0.908176
GA03_St4_135m	135	38.3269	291.13	St 4	Nov	2011	0.399434	2.59632	1.90397	1.38471	2.25015	0.649081	0	0.754745	9.13041		0.0404075	0.262649	0.192609	0.140079	0.227629	0.0656622	0	0.0763514	0.923649
GA03_St4_184m	184	38.3269	291.13	St 4	Nov	2011	0	0.205895	0.178443	0.356885	1.2491	0.446107	0	0.466856	2.25799		0	0.0755623	0.0654873	0.130975	0.458411	0.163718	0	0.171333	0.828667
GA03_St6_64m	64	37.5954	291.595	St 6	Nov	2011	1.80927	68	0.940818	2.35205	6.42892	0.0653346	0	26.4605	80.6862		0.0168859	0.634644	0.00878065	0.0219516	0.0600011	0.000609768	0	0.246956	0.753044
GA03_St6_89m	89	37.5954	291.595	St 6	Nov	2011	1.97461	70	1.2835	1.99655	4.27832	0.475369	0	19.0286	81.3137		0.0196787	0.697612	0.0127912	0.0198974	0.0426373	0.00473747	0	0.189637	0.810363
GA03_St6_111m	111	37.5954	291.595	St 6	Nov	2011	0.656239	62.6708	1.42185	0.85311	2.13278	0.296219	0	22.3817	67.6591		0.00728823	0.696026	0.0157912	0.0094747	0.0236868	0.00328983	0	0.248573	0.751427
GA03_St6_139m	139	37.5954	291.595	St 6	Nov	2011	0	0.591368	0.512519	0.512519	1.7084	0.498282	0	0.37247	4.16476		0	0.130337	0.112958	0.112958	0.376528	0.109821	0	0.0820919	0.917908
GA03_St6_160m	160	37.5954	291.595	St 6	Nov	2011	0	0	0.66	0.825	0.66	0.20625	0	0.863372	2.51625		0	0	0.195288	0.24411	0.195288	0.0610275	0	0.255464	0.744536
SPGT15_14m	14	-32.495	202.005	GT 15	June	2011	153.745	95.2658	15.5013	0.439753	0.879507	0.137423	0	0.81495	265.968		0.57629	0.357091	0.0581045	0.00164835	0.00329671	0.000515111	0	0.00305473	0.996945
SPGT15_31m	31	-32.495	202.005	GT 15	June	2011	141.311	82.8926	14.8983	0.883799	1.26257	0	0	1.32129	241.248		0.582558	0.341727	0.0614188	0.00364349	0.00520499	0	0	0.00544708	0.994553
SPGT15_51m	51	-32.495	202.005	GT 15	June	2011	168.484	107.845	18.7929	0.332618	0.332618	0.0692955	0	1.01526	295.857		0.567531	0.363272	0.0633032	0.00112041	0.00112041	0.000233419	0	0.00341986	0.99658
SPGT15_76m	76	-32.495	202.005	GT 15	June	2011	129.743	76.9025	11.2725	0.42272	1.12725	0	0	0.737302	219.468		0.58919	0.349232	0.0511911	0.00191967	0.00511911	0	0	0.00334826	0.996652
SPGT15_100m	100	-32.495	202.005	GT 15	June	2011	134.849	84.6407	16.7635	0.475561	1.90224	0	0	1.03683	238.631		0.562649	0.353158	0.0699448	0.00198425	0.007937	0	0	0.00432613	0.995674
SPGT15_202m	202	-32.495	202.005	GT 15	June	2011	0.636226	0.159056	0.964942	1.92988	2.34343	1.49336	0	0.360651	7.5269		0.080662	0.0201655	0.122337	0.244675	0.297105	0.189332	0	0.0457241	0.954276
SPGT19_15m	15	-32.5013	206.002	GT 19	June	2011	191.483	51.8439	15.2851	0.503904	1.17577	0.0349933	0	0.329588	260.327		0.734619	0.198897	0.0586407	0.00193321	0.00451082	0.000134251	0	0.00126445	0.998736
SPGT19_32m	32	-32.5013	206.002	GT 19	June	2011	164.573	48.0847	12.2504	0.546895	1.31255	0	0	1.00158	226.768		0.722543	0.211111	0.0537844	0.00240109	0.00576262	0	0	0.00439734	0.995603
SPGT19_51m	51	-32.5013	206.002	GT 19	June	2011	229.281	82.9949	32.6009	0	3.44983	0	0	2.25643	348.327		0.653999	0.236734	0.0929905	0	0.00984026	0	0	0.00643622	0.993564
SPGT19_77m	77	-32.5013	206.002	GT 19	June	2011	295.89	88.7034	20.5647	0.138018	1.79424	0	0	2.76839	407.091		0.721932	0.216424	0.0501752	0.000336746	0.0043777	0	0	0.0067545	0.993246
SPGT19_100m	100	-32.5013	206.002	GT 19	June	2011	134.854	40.5843	9.25607	0.8639	0.987314	0.0514226	0	0.484329	186.597		0.720831	0.216934	0.0494762	0.00461778	0.00527746	0.000274868	0	0.00258887	0.997411
SPGT19_201m	201	-32.5013	206.002	GT 19	June	2011	0.524712	0	2.27375	2.27375	4.77488	2.36849	0	0.0991462	12.2156		0.0426085	0	0.184637	0.184637	0.387737	0.19233	0	0.00805102	0.991949
SPGT3_16m	16	-32.4937	190.005	GT 3	June	2011	112.614	77.3863	8.50864	0.500508	1.16785	0	0	1.23672	200.178		0.559118	0.384214	0.0422445	0.00248497	0.00579826	0	0	0.00614018	0.99386
SPGT3_32m	32	-32.4937	190.005	GT 3	June	2011	141.782	90.2599	6.98044	0.886405	1.10801	0	0	0.821342	241.017		0.586269	0.373224	0.0288641	0.00366528	0.0045816	0	0	0.00339624	0.996604
SPGT3_51m	51	-32.4937	190.005	GT 3	June	2011	165.943	113.394	9.38805	0.199746	0.599237	0.0832274	0	0.0870984	289.607		0.57282	0.391427	0.0324068	0.000689506	0.00206852	0.000287294	0	0.000300657	0.999699
SPGT3_75m	75	-32.4937	190.005	GT 3	June	2011	176.431	81.997	13.5186	0.730736	0.91342	0	0	1.27454	273.59		0.641881	0.298317	0.0491828	0.00265853	0.00332316	0	0	0.00463697	0.995363
SPGT3_103m	103	-32.4937	190.005	GT 3	June	2011	100.636	57.8704	19.0839	0.315436	0.78859	0.0657158	0	0.687724	178.76		0.56081	0.322491	0.106348	0.00175781	0.00439453	0.000366211	0	0.00383244	0.996168
SPGT3_203m	203	-32.4937	190.005	GT 3	June	2011	2.13011	0.639034	0.553829	1.8461	4.24602	1.8461	0	0.482991	11.2612		0.181376	0.0544128	0.0471577	0.157192	0.361543	0.157192	0	0.0411259	0.958874
SPGT8_15m	15	-32.4957	195.008	GT 8	June	2011	128.424	90.9879	2.76433	0.872947	0.581965	0	0	0.570968	223.631		0.572804	0.40583	0.0123296	0.00389357	0.00259571	0	0	0.00254667	0.997453
SPGT8_28m	28	-32.4957	195.008	GT 8	June	2011	152.066	96.3449	6.07019	0.40468	0.944252	0.0562055	0	0.764656	255.886		0.592502	0.375393	0.0236515	0.00157677	0.00367913	0.000218996	0	0.00297936	0.997021
SPGT8_50m	50	-32.4957	195.008	GT 8	June	2011	205.036	137.533	9.55151	0.696464	1.9899	0	0	0.824303	354.806		0.576542	0.386729	0.0268579	0.00195839	0.0055954	0	0	0.00231786	0.997682
SPGT8_75m	75	-32.4957	195.008	GT 8	June	2011	147.318	90.4772	11.6237	0.553508	0.553508	0	0	0.643614	250.526		0.586529	0.360223	0.0462781	0.00220372	0.00220372	0	0	0.00256247	0.997438
SPGT8_100m	100	-32.4957	195.008	GT 8	June	2011	130.378	92.3347	5.15172	0.343448	1.03034	0	0	0.149759	229.238		0.568374	0.402526	0.0224585	0.00149724	0.00449171	0	0	0.000652864	0.999347
SPGT8_204m	204	-32.4957	195.008	GT 8	June	2011	0.589321	0.29466	4.97976	2.04298	6.76737	0.904444	0	0.556771	15.5785		0.0365237	0.0182618	0.308625	0.126615	0.419414	0.0560537	0	0.0345064	0.965494
GA03_St7_33m	33	24.0001	338.002	St 7	Oct	2010	4.99313	238.971	0.0865476	0.173095	1.6444	0.0360615	0	4.64187	247.179		0.0198281	0.948972	0.000343687	0.000687373	0.00653005	0.000143203	0	0.0184332	0.981567
GA03_St7_57m	57	24.0001	338.002	St 7	Oct	2010	2.17463	106.222	0.289951	0.144976	1.44976	0.0604065	0	3.98261	112.963		0.0185953	0.908307	0.00247937	0.00123968	0.0123968	0.000516535	0	0.0340553	0.965945
GA03_St7_72m	72	24.0001	338.002	St 7	Oct	2010	3.5424	140.446	3.07008	0.361186	2.34771	0.150494	0	2.5199	151.036		0.0230691	0.914623	0.0199933	0.00235215	0.015289	0.000980061	0	0.0164103	0.98359
GA03_St7_151m	151	24.0001	338.002	St 7	Oct	2010	2.51063	43.2602	25.4411	0.669502	5.18864	0	0	2.26249	76.2138		0.0319922	0.551251	0.324188	0.00853127	0.0661173	0	0	0.0288302	0.97117
GA03_St7_201m	201	24.0001	338.002	St 7	Oct	2010	0	0	0.173684	0	0.347367	0.144736	0	0.227203	0.692508		0	0	0.188846	0	0.377692	0.157372	0	0.247037	0.752963
GA03_St8_31m	31	35.4162	293.457	St 8	Nov	2011	1.51658	131.496	2.62873	0.695841	1.469	0.612082	0	21.4079	138.418		0.00948891	0.822744	0.0164474	0.00435373	0.00919122	0.00382967	0	0.133945	0.866055
GA03_St8_68m	68	35.4162	293.457	St 8	Nov	2011	1.97476	96.5658	4.1075	0.513438	2.2249	0.285243	0	14.8509	105.672		0.016385	0.801226	0.0340808	0.0042601	0.0184604	0.00236672	0	0.123221	0.876779
GA03_st8_111m	111	35.4162	293.457	St 8	Nov	2011	0.129569	1.81397	2.13357	2.35816	3.14421	0.4211	0	0.587581	10.0006		0.0122372	0.17132	0.201505	0.222717	0.296955	0.0397708	0	0.0554942	0.944506
GA03_st8_135m	135	35.4162	293.457	St 8	Nov	2011	0	0	0.280317	0	0.280317	0	0	0.183347	0.560635		0	0	0.37678	0	0.37678	0	0	0.24644	0.75356
GA03_St8_186m	186	35.4162	293.457	St 8	Nov	2011	0.117413	0	0	0.101758	0	0	0	0.221855	0.21917		0.266226	0	0	0.23073	0	0	0	0.503044	0.496956
Med_15	15	37.3536	-0.286194	Med-Oct_2015	Oct	2015	27.9351	2.53956	0	0.73365	3.66825	0.305688	0	22.0735	36.8753		0.473888	0.0430807	0	0.0124455	0.0622277	0.00518564	0	0.374452	0.625548
Med_30	30	37.3536	-0.286194	Med-Oct_2015	Oct	2015	66.3123	11.973	0	1.59641	0.798203	0	0	4.5247	81.6009		0.769948	0.139018	0	0.0185358	0.00926789	0	0	0.052536	0.947464
Med_60	60	37.3536	-0.286194	Med-Oct_2015	Oct	2015	3.08869	1.02956	35.6916	6.24602	4.46145	0.371787	0	4.27987	50.8891		0.0559861	0.018662	0.64695	0.113216	0.0808688	0.00673906	0	0.0775776	0.922422
Med_75	75	37.3536	-0.286194	Med-Oct_2015	Oct	2015	0.240232	0.720696	12.9085	25.8169	16.8643	19.4321	0	1.54335	76.4632		0.00307964	0.00923892	0.165479	0.330959	0.216191	0.249109	0	0.0197849	0.980215
Med_90	90	37.3536	-0.286194	Med-Oct_2015	Oct	2015	0.595104	1.19021	4.12606	4.64181	7.2206	8.16615	0	2.02405	26.535		0.0208377	0.0416753	0.144474	0.162534	0.25283	0.285939	0	0.0708722	0.929128
