# Supplementary material for: Associations between picocyanobacterial ecotypes and cyanophage host genes across ocean basins and depth
Source: PeerJ. 2023 Feb 28;11:e14924. doi: 10.7717/peerj.14924 (PMC9983427; doi:10.7717/peerj.14924)
Supplement: Table S3 — The abundance of myo, podo, and sipho-cyanophage as well as the uncultured BAC21E04 group were determined using normalized reads of terminase (terL). [file peerj-11-14924-s005.xlsx]

## Sheet: terL
Name	Depth(m)	Station	Month	Year	Myocyanophage normalized reads	Podocyanophage normalized reads	Siphocyanophage normalized reads	BAC21E04 Cyanophage normalized reads
HOT272_5m	5	Aloha	May	2015	662.747	102.314	81.9537	42.5379
HOT272_25m	25	Aloha	May	2015	571.395	119.496	78.6173	36.0168
HOT272_45m	45	Aloha	May	2015	606.046	139.564	100.24	48.6502
HOT272_75m	75	Aloha	May	2015	1327.9	542.897	160.239	63.0763
HOT272_100m	100	Aloha	May	2015	1270.77	409.64	130.582	68.0456
HOT272_125m	125	Aloha	May	2015	1124.22	252.159	114.094	70.6757
HOT272_150m	150	Aloha	May	2015	735.046	243.449	52.1309	57.2834
HOT272_175m	175	Aloha	May	2015	454.888	122.229	27.9006	21.2202
HOT272_200m	200	Aloha	May	2015	358.754	46.2105	33.6089	26.3009
HOT272_225m	225	Aloha	May	2015	266.133	37.8753	18.8444	27.2153
HOT272_250m	250	Aloha	May	2015	91.6624	16.1361	4.0074	5.20441
HOT275_5m	5	Aloha	Aug	2015	550.714	67.8068	66.4521	19.1058
HOT275_25m	25	Aloha	Aug	2015	487.653	66.2263	66.6799	20.3903
HOT275_45m	45	Aloha	Aug	2015	1721.24	308.716	104.692	31.0987
HOT275_75m	75	Aloha	Aug	2015	1572.45	543.771	87.2964	30.9722
HOT275_100m	100	Aloha	Aug	2015	1390.95	503.862	76.0324	57.2181
HOT275_125m	125	Aloha	Aug	2015	308.039	111.389	19.3427	9.67135
HOT275_150m	150	Aloha	Aug	2015	134.222	50.0153	6.05647	6.34037
HOT275_175m	175	Aloha	Aug	2015	55.7859	21.1799	3.0847	2.771
HOT275_200m	200	Aloha	Aug	2015	76.614	15.7312	3.91325	2.16558
HOT275_225m	225	Aloha	Aug	2015	26.6456	9.92926	2.60971	0.294644
HOT278_5m	5	Aloha	Nov	2015	868.223	202.126	83.8448	35.7686
HOT278_25m	25	Aloha	Nov	2015	1067.52	217.623	85.6664	38.778
HOT278_45m	45	Aloha	Nov	2015	1285.86	218.394	94.9972	44.6163
HOT278_75m	75	Aloha	Nov	2015	1738.25	582.114	116.274	40.883
HOT278_100m	100	Aloha	Nov	2015	1642.09	277.326	82.7337	65.1453
HOT278_125m	125	Aloha	Nov	2015	962.91	223.466	39.9186	38.1514
HOT278_150m	150	Aloha	Nov	2015	338.953	77.826	17.3049	19.2176
HOT278_175m	175	Aloha	Nov	2015	150.966	26.5435	7.08367	10.6255
HOT278_200m	200	Aloha	Nov	2015	220.393	38.0074	13.9781	16.8373
HOT278_225m	225	Aloha	Nov	2015	79.3817	12.5897	4.02967	4.02967
ETNP_60m	60	St 136	April	2012	157.796	20.0248	8.82448	9.11166
ETNP_70m	70	St 136	April	2012	753.57	999.815	83.2204	130.983
ETNP_90m	90	St 136	April	2012	515.376	880.442	76.237	161.895
ETNP_100m	100	St 136	April	2012	390.133	69.5333	8.8	28.5333
ETNP_110m	110	St 136	April	2012	461.012	168.636	15.7025	72.0987
ETNP_120m	120	St 136	April	2012	518.229	174.426	23.5073	58.6313
ETNP_140m	140	St 136	April	2012	35.0361	10.4885	5.24425	2.78949
ETSP_St9_80m	80	St 9	July	2013	38.3	41.5567	3.47369	5.10969
ETSP_St9_100m	100	St 9	July	2013	12.8414	4.63645	1.49167	2.25059
ETSP_St9_110m	110	St 9	July	2013	12.192	6.71316	2.19745	1.58825
ETSP_St9_120m	120	St 9	July	2013	7.19271	1.53652	2.66237	0.223729
GA03_St1_30m	30	St 1	Nov	2011	609.098	474.693	78.9998	32.678
GA03_St1_57m	57	St 1	Nov	2011	137.968	80.3541	16.2522	6.59508
GA03_St1_89m	89	St 1	Nov	2011	39.6566	45.7656	6.03359	3.53693
GA03_St1_109m	109	St 1	Nov	2011	12.9886	9.78232	2.56387	0.493053
GA03_St10_41m	41	BATS	Nov	2011	245.715	97.6075	15.2642	9.26411
GA03_St10_75m	75	BATS	Nov	2011	301.998	125.76	18.508	11.6586
GA03_St10_89m	89	BATS	Nov	2011	549.623	241.544	32.5705	9.04737
GA03_St10_109m	109	BATS	Nov	2011	155.887	90.2592	11.1911	7.38381
GA03_St10_182m	182	BATS	Nov	2011	443.48	161.64	30.9622	27.6316
GA03_St14_40m	40	St 14	Nov	2011	26.0021	39.7742	11.1121	14.9051
GA03_St14_69m	69	St 14	Nov	2011	226.856	373.974	30.5187	21.8486
GA03_St14_99m	99	St 14	Nov	2011	506.661	342.424	44.2256	32.2123
GA03_St14_113m	113	St 14	Nov	2011	682.86	294.077	38.2822	45.5892
GA03_St14_133m	133	St 14	Nov	2011	712.709	296.381	37.8713	31.7667
GA03_St14_183m	183	St 14	Nov	2011	303.301	105.463	3.93847	3.30323
GA03_St16_39m	39	St 16	Nov	2011	98.5566	110.188	11.3779	34.39
GA03_St16_60m	60	St 16	Nov	2011	102.359	107.736	15.6434	41.9495
GA03_St16_89m	89	St 16	Nov	2011	580.613	419.255	40.8635	26.2962
GA03_St16_110m	110	St 16	Nov	2011	838.282	349.74	41.0728	40.7812
GA03_St16_135m	135	St 16	Nov	2011	887.563	662.029	46.3813	39.5118
GA03_St16_187m	187	St 16	Nov	2011	7.63316	5.43822	0.559537	0.263312
GA03_St18_38m	38	St 18	Dec	2011	198.39	75.2857	6.69899	7.2989
GA03_St18_65m	65	St 18	Dec	2011	225.241	113.033	7.75659	7.75659
GA03_St18_75m	75	St 18	Dec	2011	176.774	103.143	8.83252	7.05945
GA03_St18_113m	113	St 18	Dec	2011	1100.13	710.54	66.9858	25.2315
GA03_St18_184m	184	St 18	Dec	2011	303.122	139.473	8.93152	6.42634
GA03_St18_233m	233	St 18	Dec	2011	125.551	127.055	6.46069	2.08409
GA03_St20_39m	39	St 20	Dec	2011	936.379	320.625	35.7721	16.5378
GA03_St20_74m	74	St 20	Dec	2011	1408.06	871.552	81.629	18.5331
GA03_St20_99m	99	St 20	Dec	2011	863.087	545.242	106.315	22.4115
GA03_St20_134m	134	St 20	Dec	2011	525.725	386.321	29.3026	5.10822
GA03_St20_183m	183	St 20	Dec	2011	56.4292	39.5743	2.35679	1.22204
GA03_St20_234m	234	St 20	Dec	2011	25.761	13.7791	1.3427	0.370401
GA03_St22_50m	50	St 22	Dec	2011	1024.37	301.656	78.4841	22.974
GA03_St22_74m	74	St 22	Dec	2011	1108.25	316.016	86.8844	25.2496
GA03_St22_84m	84	St 22	Dec	2011	1473.51	573.016	73.5731	37.9577
GA03_St22_123m	123	St 22	Dec	2011	414.703	257.496	12.3192	5.79187
GA03_St24_48m	48	St 24	Dec	2011	895.736	204.09	42.7555	18.1879
GA03_St24_71m	71	St 24	Dec	2011	901.176	513.182	43.7868	21.1821
GA03_St24_89m	89	St 24	Dec	2011	1099.83	964.668	61.753	19.7007
GA03_St24_135m	135	St 24	Dec	2011	18.5028	10.887	1.79733	0.359467
GA03_St3_28m	28	St 3	Nov	2011	299.865	184.499	40.0268	42.3813
GA03_St3_61m	61	St 3	Nov	2011	228.709	195.627	28.6878	20.8892
GA03_St3_86m	86	St 3	Nov	2011	269.728	136.947	14.5159	7.92584
GA03_St3_108m	108	St 3	Nov	2011	397.082	186.75	16.6493	12.8072
GA03_St3_135m	135	St 3	Nov	2011	83.0612	67.6998	9.40076	7.44017
GA03_St3_186m	186	St 3	Nov	2011	26.1387	24.8714	3.44845	3.71372
GA03_St4_39m	39	St 4	Nov	2011	472.504	240.102	52.9691	69.8063
GA03_St4_65m	65	St 4	Nov	2011	597.267	246.333	52.9963	70.7475
GA03_St4_91m	91	St 4	Nov	2011	495.003	260.372	62.4905	84.3803
GA03_St4_111m	111	St 4	Nov	2011	386.287	239.13	35.2242	27.8792
GA03_St4_135m	135	St 4	Nov	2011	333.281	222.245	22.607	17.5639
GA03_St4_184m	184	St 4	Nov	2011	195.752	171.93	19.4518	16.8523
GA03_St6_64m	64	St 6	Nov	2011	509.61	158.685	31.1926	37.0215
GA03_St6_89m	89	St 6	Nov	2011	454.358	131.772	24.5008	32.8826
GA03_St6_111m	111	St 6	Nov	2011	731.471	332.997	68.426	94.9964
GA03_St6_139m	139	St 6	Nov	2011	188.778	79.0133	9.95515	4.03355
GA03_St6_160m	160	St 6	Nov	2011	171.517	123.09	16.7431	5.13898
SPGT15_14m	14	GT 15	June	2011	669.525	354.221	31.8659	8.94676
SPGT15_31m	31	GT 15	June	2011	619.038	347.018	28.8582	8.30861
SPGT15_51m	51	GT 15	June	2011	548.654	313.16	27.7368	6.93419
SPGT15_76m	76	GT 15	June	2011	586.735	229.044	28.455	8.91874
SPGT15_100m	100	GT 15	June	2011	575.785	356.195	34.9982	8.30161
SPGT15_202m	202	GT 15	June	2011	196.917	143.363	7.1325	2.97765
SPGT19_15m	15	GT 19	June	2011	421.137	192.071	18.6897	6.87678
SPGT19_32m	32	GT 19	June	2011	363.247	214.109	17.5277	5.3847
SPGT19_51m	51	GT 19	June	2011	493.153	373.789	42.2852	12.6509
SPGT19_77m	77	GT 19	June	2011	801.128	483.686	45.2743	21.0772
SPGT19_100m	100	GT 19	June	2011	336.057	225.293	21.7608	6.38564
SPGT19_201m	201	GT 19	June	2011	642.676	282.969	9.70876	4.22617
SPGT3_16m	16	GT 3	June	2011	1291.65	914.929	126.636	27.8246
SPGT3_32m	32	GT 3	June	2011	782.862	643.918	99.7985	16.531
SPGT3_51m	51	GT 3	June	2011	847.821	506.355	76.6606	13.6464
SPGT3_75m	75	GT 3	June	2011	1070.98	590.434	102.507	21.7495
SPGT3_103m	103	GT 3	June	2011	836.852	441.058	71.702	14.2612
SPGT3_203m	203	GT 3	June	2011	875.881	577.182	18.0838	13.6324
SPGT8_15m	15	GT 8	June	2011	289.673	155.821	13.8134	4.09285
SPGT8_28m	28	GT 8	June	2011	342.561	179.273	17.0762	4.47235
SPGT8_50m	50	GT 8	June	2011	300.574	226.052	19.6924	4.1484
SPGT8_75m	75	GT 8	June	2011	280.167	198.433	18.4441	3.15125
SPGT8_100m	100	GT 8	June	2011	174.386	177.219	19.1507	2.6742
SPGT8_204m	204	GT 8	June	2011	787.824	202.574	14.881	12.7002
GA03_St7_33m	33	St 7	Oct	2010	926.405	205.68	49.95	43.5636
GA03_St7_57m	57	St 7	Oct	2010	550.11	230.221	57.75	22.9407
GA03_St7_72m	72	St 7	Oct	2010	2393.67	1062.43	103.74	47.4465
GA03_St7_151m	151	St 7	Oct	2010	1165.27	506.562	67.09	31.446
GA03_St7_201m	201	St 7	Oct	2010	30.5683	17.6289	2.88	1.39598
GA03_St8_31m	31	St 8	Nov	2011	455.505	204.693	30.76	29.6731
GA03_St8_68m	68	St 8	Nov	2011	354.786	221.292	30.76	29.6731
GA03_st8_111m	111	St 8	Nov	2011	309.705	236.04	32.04	23.5793
GA03_st8_135m	135	St 8	Nov	2011	84.3755	74.7046	9.22	10.6316
GA03_St8_186m	186	St 8	Nov	2011	45.4347	55.9158	6.24	6.33855
Med_15	15	Med	Oct	2015	47.3204	31.1801	5.50238	6.96968
Med_30	30	Med	Oct	2015	117.336	243.053	12.7713	35.1209
Med_45	45	Med	Oct	2015	33.6325	73.9915	12.1077	14.1257
Med_60	60	Med	Oct	2015	60.6757	26.3225	4.46145	10.7075
Med_75	75	Med	Oct	2015	52.0503	40.4951	4.89273	14.2618
Med_90	90	Med	Oct	2015	46.9339	35.3294	2.57879	9.54151
