# Supplementary material for: Associations between picocyanobacterial ecotypes and cyanophage host genes across ocean basins and depth
Source: PeerJ. 2023 Feb 28;11:e14924. doi: 10.7717/peerj.14924 (PMC9983427; doi:10.7717/peerj.14924)
Supplement: Table S4 — The proportion of cyanophage with each viral host gene were determined by a ratio between normalized reads for the gene divided by normalized reads for cyanophage single copy core gene terminase (terL). The ratios pertain to myo-cyanophage unless otherwise noted. [file peerj-11-14924-s006.xlsx]

## Sheet: gene-terL ratio
Name	Depth(m)	purC	purN	purM	purS	psbD	speD	cobS	pyrE	thyX	pstS	phoH	myo_psbA	podo_psbA	talC	nirA	nirC	pbsA
HOT272_5m	5	0.002045	0.0643459	0.0560483	0	1.02621	0.502318	0.832754	0.00275344	0.651093	0.0853283	0.787264	1.04754	0.675514	0.648787	0	0	0.123584
HOT272_25m	25	0.00246587	0.0543478	0.0710969	0	1.06888	0.519275	0.811143	0.00653808	0.613467	0.0990471	0.772833	1.03434	0.608225	0.634366	0	0	0.133294
HOT272_45m	45	0.00386137	0.0545647	0.0610799	0	1.03103	0.477154	0.822816	0.00392656	0.645281	0.088733	0.784127	1.07468	0.693909	0.663337	0	0	0.153463
HOT272_75m	75	0.00852848	0.0957959	0.0729253	0.000587705	0.879089	0.482722	0.819942	0.0162319	0.694492	0.0885359	0.77409	1.03048	0.757064	0.662649	0	0	0.197342
HOT272_100m	100	0.013899	0.122457	0.0988539	0.00230326	0.884914	0.445888	0.79499	0.0335893	0.698656	0.121122	0.768416	1.01076	0.740945	0.674527	0	0.000124927	0.175562
HOT272_125m	125	0.0295922	0.130635	0.117241	0.00257251	0.826741	0.503646	0.817923	0.0480623	0.680142	0.126466	0.78912	1.02464	0.697074	0.665493	3.20283e-05	0.000208492	0.143855
HOT272_150m	150	0.357888	0.614148	0.464163	0.0187959	0.32848	0.220828	0.803704	0.343845	0.780273	0.208398	0.755974	1.01751	0.552012	0.755738	0.000534885	0.000773999	0.243542
HOT272_175m	175	0.514399	0.821978	0.600267	0.0153846	0.166154	0.155912	0.842286	0.472527	0.862287	0.242742	0.797762	1.02632	0.606752	0.786251	0.000437809	0	0.215934
HOT272_200m	200	0.122684	0.424978	0.228163	0.0123263	0.524765	0.45637	0.81539	0.261734	0.779633	0.210902	0.790311	1.05106	0.787013	0.688268	0.000111611	0	0.0848754
HOT272_225m	225	0.184672	0.534384	0.33783	0.0124185	0.411673	0.340978	0.809761	0.301869	0.808854	0.201106	0.808588	0.996786	0.859979	0.751763	0	0	0.0845166
HOT272_250m	250	0.607837	1.0392	0.753268	0.0361585	0.147527	0.217569	0.834676	0.583702	0.942891	0.163199	0.856803	0.978958	0.557787	0.927181	0.00115246	0.00093256	0.105483
HOT275_5m	5	0.00430225	0.0598873	0.0877301	0	1.08924	0.358802	0.815914	0.00356472	0.672077	0.137581	0.739748	1.02585	0.904842	0.681777	0	0	0.202018
HOT275_25m	25	0.0025426	0.070786	0.0801287	0	1.06577	0.349771	0.791523	0.00447679	0.693113	0.137566	0.768389	1.05323	0.892298	0.657299	0	0	0.236552
HOT275_45m	45	0.000774808	0.0477351	0.0622852	0	1.01742	0.246673	0.836349	0.0027106	0.762367	0.141539	0.792553	1.05307	0.847571	0.645318	0	0	0.406593
HOT275_75m	75	0.00472478	0.096598	0.0763728	0	0.873082	0.295619	0.801006	0.0216014	0.727989	0.114289	0.763746	1.02752	0.928793	0.613272	0	0	0.317045
HOT275_100m	100	0.229895	0.649304	0.443447	0.028286	0.184088	0.0899525	0.822215	0.3351	0.85937	0.278943	0.755105	1.0798	0.875761	0.859559	5.07628e-05	0.000416036	0.328666
HOT275_150m	150	0.763995	1.00214	0.753465	0.0392297	0.11127	0.0640111	0.748133	0.619014	0.919659	0.124556	0.744373	0.966432	0.420373	0.933146	0	0.00347403	0.160356
HOT275_175m	175	0.681116	1.28538	0.876595	0.0471698	0.107547	0.213675	0.928903	0.648585	1.01365	0.171783	0.763519	0.930294	0.441438	1.02993	0.000939638	0	0.137182
HOT275_200m	200	0.694276	1.14855	0.797838	0.0701403	0.0736473	0.14559	0.788588	0.632515	0.959366	0.181707	0.7576	1.0337	0.527034	0.927795	0.000499006	0.00162899	0.0904531
HOT275_225m	225	0.78806	1.46661	1.08209	0.0715421	0.0238474	0.271765	0.843762	0.621735	0.889626	0.166101	0.691719	0.912677	0.546807	1.1834	0.00316698	0.0025946	0.113834
HOT278_5m	5	0.00287932	0.079047	0.0788346	0.00111334	0.867735	0.400611	0.863614	0.00715717	0.746173	0.10934	0.823825	1.04754	0.675514	0.712704	0	0	0.208987
HOT278_25m	25	0.00274873	0.0846951	0.0854726	0	0.866401	0.471124	0.852685	0.00555144	0.755917	0.121473	0.822435	1.03434	0.608225	0.735218	0	0	0.187483
HOT278_45m	45	0.00243454	0.077191	0.080464	0	0.854561	0.467861	0.872396	0.00563131	0.746574	0.105656	0.799458	1.07468	0.693909	0.719392	0	0	0.184979
HOT278_75m	75	0.0272155	0.264503	0.127259	0.00303463	0.585645	0.377509	0.848101	0.0524069	0.825162	0.0767936	0.807604	1.03048	0.757064	0.749024	0	9.56192e-05	0.327133
HOT278_100m	100	0.356558	0.790989	0.528299	0.0357343	0.170095	0.0988128	0.846131	0.397432	0.923457	0.325321	0.807337	1.01076	0.740945	0.851997	5.58305e-05	9.1389e-05	0.393749
HOT278_125m	125	0.566061	0.926679	0.687626	0.044473	0.0890411	0.05163	0.805876	0.534253	0.942692	0.265439	0.819767	1.02464	0.697074	0.884381	4.73752e-05	0.000154575	0.326052
HOT278_150m	150	0.414208	0.962323	0.703281	0.0496464	0.12568	0.0860281	0.847259	0.577345	1.01232	0.327863	0.823968	1.01751	0.552012	0.938213	0	0.000220669	0.263216
HOT278_175m	175	0.286911	1.08078	0.750811	0.0492542	0.15114	0.157565	0.867942	0.59105	1.02281	0.393613	0.794261	1.02632	0.606752	0.965614	0	0	0.220029
HOT278_200m	200	0.24551	1.01072	0.689874	0.0484439	0.124193	0.112923	0.875468	0.654832	0.963881	0.372915	0.83792	1.05106	0.787013	0.971527	0.00029243	0	0.168141
HOT278_225m	225	0.309864	1.04077	0.737015	0.0429185	0.23176	0.262891	0.789236	0.65655	1.06079	0.353383	0.79656	0.996786	0.859979	0.889025	0	0	0.182583
ETNP_60m	60	0.17	0.79	0.61	0.2	0.388307	0.0472348	1.12284	0.88263	0.73	0.862713	0.812421	1.0619	1.36897	0.83914	0.00329588	0.00191118	0.214865
ETNP_70m	70	0.22	0.81	0.67	0.14	0.0840935	0.0113595	0.890487	0.580033	0.78	0.320543	0.923274	0.347181	0.434767	0.722628	0.0122913	0.0109438	0.0861332
ETNP_90m	90	0.56	0.93	0.82	0.42	0.0656849	0.00786636	0.948238	0.583162	0.92	0.121581	1.00899	0.120497	0.115843	1.01681	0.493322	0.352689	0.153321
ETNP_100m	100	0.88	0.88	1.02	0.72	0.0360183	0.0205233	0.91616	0.288862	0.99	0.04236	0.741222	0.0571488	0.104271	0.919292	1.2697	0.673094	0.221141
ETNP_110m	110	0.99	0.91	1.07	0.83	0.0321159	0.0309479	1.04177	0.161502	0.97	0.0205151	0.765918	0.0267849	0.0303173	0.957368	1.77032	0.900882	0.246378
ETNP_120m	120	0.74	0.92	0.88	0.88	0.023658	0.0224672	1.02266	0.175026	1.09	0.0247895	1.00248	0.0247281	0.0289036	1.25156	1.13156	0.757715	0.238049
ETSP_St9_80m	80	0.793284	0.848864	0.968721	0.358183	0.0384391	0.0448009	0.749163	0.484506	0.706328	0.0460713	0.614013	1.16752	0.702438	0.827637	1.148	0.790003	0.274076
ETSP_St9_100m	100	1.0448	1.04462	0.879363	0.638945	0.0547667	0.0346735	0.781896	0.699447	0.837253	0.039357	0.67579	0.929682	0.381468	0.846437	1.14754	1.05437	0.174387
ETSP_St9_110m	110	0.880443	1.65187	1.07547	0.541741	0.0373002	0.204946	0.893061	0.773259	0.948566	0.0397656	0.729575	0.86343	0.154321	0.837351	1.11278	1.33948	0.233076
ETSP_St9_120m	120	0.887424	3.03406	1.53457	0.541796	0.00928793	0.304305	0.873446	1.18101	0.823398	0.0369669	0.640547	0.730994	0.603865	0.803091	0.931259	1.10862	0.210134
GA03_St1_30m	30	0.170034	0.162501	0.245003	0.0494265	1.08384	0.351509	0.715922	0.185349	0.919876	0.600049	0.810801	1.28849	0.832359	0.739399	9.28859e-05	0	0.124342
GA03_St1_57m	57	0.299074	0.321307	0.479433	0.14304	0.885141	0.403264	0.768088	0.29584	0.905754	0.645577	0.799623	1.42652	0.866734	0.751238	0.000850569	0	0.224899
GA03_St1_89m	89	0.822137	0.865123	0.807201	0.0953678	0.514986	0.291111	0.987127	0.939081	1.18847	0.695433	0.837336	1.61977	0.884774	1.05714	0.00271394	0	0.212658
GA03_St1_109m	109	0.75571	0.850649	1.21237	0.038961	0.545455	0.710401	0.918586	1.12245	1.26002	0.70944	0.738916	1.29054	0.835091	1.44127	0	0	0.302039
GA03_St10_41m	41	0.118987	0.208292	0.172911	0.00501907	0.765509	0.204195	0.780708	0.162044	0.712922	0.723046	0.752555	1.30076	1.01405	0.492699	0.000599889	0	0.272303
GA03_St10_75m	75	0.0965426	0.166337	0.133989	0.000823452	0.780632	0.202696	0.762487	0.127635	0.714476	0.69637	0.723318	1.28082	0.930491	0.512645	0.000328068	0	0.259714
GA03_St10_89m	89	0.149578	0.282196	0.203794	0.00337382	0.58155	0.109989	0.770634	0.231692	0.802128	0.818061	0.743785	1.25612	0.973609	0.573368	0.000576065	0.000926972	0.411777
GA03_St10_109m	109	0.486391	0.804544	0.632734	0.00751033	0.164476	0.0850528	0.676388	0.483477	0.92361	0.656313	0.726087	1.18398	0.860165	0.717434	0.00748041	0.00607796	0.204995
GA03_St10_182m	182	0.401529	0.831663	0.724302	0.0107404	0.0176142	0.0232555	0.702766	0.570007	0.900363	0.732483	0.754876	1.22748	0.742238	0.748111	0	0.000228428	0.250234
GA03_St14_69m	69	0.0128809	0.0495439	0.0295472	0	1.17584	0.272891	1.0711	0.0584191	0.682002	0.812703	0.779073	1.5836	0.892959	0.48178	0.000313311	0.00383727	0.176259
GA03_St14_99m	99	0.128229	0.54092	0.274342	0.00537634	0.263799	0.106199	0.766254	0.389998	0.933679	0.895166	0.781915	1.40717	0.917332	0.686663	0.000951987	0	0.470339
GA03_St14_113m	113	0.323975	0.746313	0.532167	0.00589971	0.099823	0.0519376	0.785351	0.522967	0.966547	0.948708	0.786049	1.42691	0.944502	0.738838	0.00117524	0.000764142	0.460713
GA03_St14_133m	133	0.588533	0.847321	0.644878	0.0137185	0.0673015	0.0310374	0.647325	0.568051	1.01472	0.93392	0.799443	1.36267	0.882637	0.774329	0.000643006	0.00052105	0.41184
GA03_St14_183m	183	1.11873	0.821489	0.813283	0.0434875	0.0146373	0.0299163	0.698411	0.699664	1.10129	0.643051	0.794212	1.28006	0.347502	0.840721	0	0.000687999	0.322128
GA03_St16_39m	39	0.0505332	0.142586	0.0467043	0	1.65019	0.373729	0.768972	0.0497918	0.837311	0.75289	0.865732	1.23569	0.768379	0.633237	0.00126238	0.00170825	0.163945
GA03_St16_60m	60	0.0412145	0.101594	0.0610276	0	1.62311	0.347329	0.710563	0.0583381	0.781555	0.70286	0.853382	1.2832	0.866816	0.623671	0	0.00112562	0.134265
GA03_St16_89m	89	0.0269307	0.125511	0.0687147	0.000552914	0.717572	0.207461	0.840803	0.140401	0.854075	0.886148	0.875634	1.37489	0.93339	0.576194	0.00099128	0.00121202	0.382613
GA03_St16_110m	110	0.19492	0.706987	0.433809	0.00876779	0.255345	0.0956905	0.838151	0.477411	0.997318	0.977744	0.898394	1.30746	1.03222	0.726423	0.000940462	0.00133331	0.421621
GA03_St16_135m	135	0.746092	0.84635	0.777274	0.0228743	0.0492125	0.0357499	0.8051	0.601034	1.04207	0.801235	0.840935	1.19889	0.77817	0.800921	0.000846233	0.000556736	0.316645
GA03_St16_187m	187	0.805574	1.06796	1.12941	0.0242718	0.101942	1.16173	1.50792	1.39563	1.38401	0.623098	0.908348	1.27828	0.627572	1.59866	0	0	0.0971006
GA03_St18_38m	38	0.0118921	0.0620767	0.0402319	0	1.21821	0.206869	0.838421	0.0313519	0.751378	0.889832	0.789457	1.47238	0.922692	0.565183	0.000749448	0.000413886	0.326287
GA03_St18_65m	65	0.00932354	0.0732113	0.0331817	0	1.22097	0.230385	0.795814	0.0225814	0.784508	0.873668	0.729008	1.55194	0.751165	0.547208	0	0	0.345578
GA03_St18_75m	75	0.0115548	0.0425217	0.0470208	0	1.2041	0.229911	0.93739	0.0300425	0.720234	0.871682	0.778509	1.6308	0.873119	0.5171	0.00110484	0	0.298229
GA03_St18_113m	113	0.343469	0.746486	0.482516	0.00873083	0.311244	0.0840868	0.93191	0.536779	1.05576	1.07961	0.819285	1.69766	0.904563	0.773335	0.000551457	0.000702796	0.441986
GA03_St18_184m	184	0.878333	0.872228	0.827204	0.0312947	0.0450644	0.0466173	0.869539	0.668046	1.1171	0.66166	0.806353	1.35279	0.5224	0.86321	0.000178114	0.000295094	0.220095
GA03_St18_233m	233	0.994353	0.803387	0.835655	0.0660884	0.0322181	0.0917894	0.83095	0.661622	1.04493	0.551148	0.791754	1.46481	0.317331	0.931697	0	0	0.120552
GA03_St20_39m	39	0.00662357	0.0434506	0.047169	0	0.968737	0.185686	0.826592	0.0221416	0.836768	0.751488	0.853675	1.41877	0.898519	0.562236	0.00021111	0	0.345408
GA03_St20_74m	74	0.011221	0.164305	0.0917672	0	1.14894	0.197699	1.03162	0.0707214	0.927264	1.23737	0.775062	1.74765	1.06723	0.701759	8.50133e-05	0	0.353012
GA03_St20_99m	99	0.367212	0.77802	0.473762	0.00864696	0.327102	0.0457511	1.28467	0.620434	1.16327	1.47803	0.779379	1.886	1.03327	0.717019	0.00106631	0.00106093	0.309242
GA03_St20_134m	134	1.04937	0.851886	0.777207	0.0314368	0.025974	0.0220238	0.994025	0.686714	1.14892	0.626583	0.874958	1.40916	0.480437	0.917182	0.000513304	0.00130574	0.25819
GA03_St20_183m	183	1.09407	0.947345	0.861069	0.0585059	0.0540054	0.138475	1.01839	0.861515	1.11649	0.584387	0.958514	1.36739	0.422915	0.944079	0	0	0.087084
GA03_St20_234m	234	1.14046	1.0664	1.0322	0.0804829	0.102616	0.232162	0.907477	1.01682	1.22009	0.501517	0.902984	1.15948	0.371417	1.29348	0	0	0.0688042
GA03_St22_50m	50	0.0112363	0.10495	0.117024	0.000338547	1.00264	0.249425	0.801465	0.093705	0.857172	0.702864	0.839809	1.38577	0.880893	0.654134	0.000539517	0	0.283505
GA03_St22_74m	74	0.0186379	0.132196	0.127738	0.000330077	0.969039	0.259265	0.755853	0.117649	0.848648	0.691781	0.859371	1.35639	0.963533	0.662486	0.000197257	9.5951e-05	0.285338
GA03_St22_84m	84	0.270014	0.806022	0.668059	0.017053	0.358913	0.11683	0.797855	0.574778	1.07636	0.756489	0.874513	1.44253	0.923204	0.830253	0.000212314	0.000537513	0.329207
GA03_St22_123m	123	1.20981	0.94697	0.959443	0.0372578	0.0163934	0.0265369	0.877604	0.728302	1.234	0.600945	0.94316	1.31949	0.548102	1.004	0.000247396	0.000728228	0.318499
GA03_St24_48m	48	0.104401	0.402649	0.339772	0.00559667	0.533176	0.200374	0.811061	0.329248	0.916372	0.462862	0.869394	1.38631	0.955621	0.64032	0.000557437	0.000205232	0.275472
GA03_St24_71m	71	0.556509	0.865972	0.799705	0.0183321	0.1388	0.0629225	0.811704	0.605457	1.06575	0.566944	0.876851	1.37643	0.816854	0.820972	0.000289826	0.000576208	0.347207
GA03_St24_89m	89	1.09868	0.91489	0.932479	0.0245352	0.0233902	0.00745609	0.805115	0.65914	1.13952	0.461978	0.883201	1.36702	0.590849	0.845142	0.000543054	0.000989685	0.458138
GA03_St24_135m	135	1.32168	1.09807	1.31335	0.124309	0.0911602	0.259716	1.06104	1.03098	1.31069	0.474149	1.04642	1.43237	0.478178	1.57022	0	0.00455847	0.137497
GA03_St3_28m	28	0.198939	0.24359	0.204853	0.0128205	0.691209	0.22385	0.894665	0.206044	0.814434	0.747362	0.726657	1.38533	0.873432	0.546146	0	0.000586204	0.152705
GA03_St3_61m	61	0.272242	0.290452	0.264353	0.0105619	0.395437	0.167907	0.910582	0.291961	0.832367	0.768023	0.764184	1.45779	0.767938	0.566054	0.000420793	0	0.190137
GA03_St3_86m	86	0.816001	0.622893	0.575404	0.00842886	0.119353	0.0331391	0.82174	0.49369	0.937576	0.617445	0.799118	1.43063	0.789454	0.676844	0.00235068	0.00108456	0.277322
GA03_St3_108m	108	0.803802	0.834691	0.797857	0.02443	0.00488599	0.0278404	0.659978	0.572941	0.973733	0.600418	0.676408	1.11963	0.604556	0.775146	0.00162218	0	0.228786
GA03_St3_135m	135	0.730254	0.891437	0.752152	0.0366972	0.0642202	0.120233	0.787828	0.738314	1.02674	0.782327	0.709009	1.48557	0.586223	1.05815	0	0	0.194897
GA03_St3_186m	186	0.604337	0.747423	0.759788	0.0103093	0.191753	0.449379	1.00726	0.751105	1.19763	1.09248	0.727714	1.75832	0.72787	1.04643	0	0	0.0914119
GA03_St4_39m	39	0.167858	0.230727	0.246207	0.00496722	0.746871	0.338365	0.830216	0.225476	0.918195	0.746269	0.793596	1.37501	0.757263	0.724691	0.00069264	0.000158183	0.261118
GA03_St4_65m	65	0.168212	0.229821	0.252533	0.00666149	0.604197	0.277087	0.685212	0.213921	0.868828	0.696805	0.740128	1.30602	0.801564	0.631589	0.000663495	0.0005306	0.258011
GA03_St4_91m	91	0.174496	0.232037	0.228079	0.00759532	0.67492	0.292777	0.773289	0.205345	0.935033	0.820295	0.816459	1.40153	0.71161	0.641433	0.000605205	0	0.254706
GA03_St4_111m	111	0.363462	0.413661	0.365717	0.0106067	0.400933	0.237518	0.791201	0.330702	0.86659	0.813075	0.802925	1.33783	0.777156	0.683773	0.00105644	0	0.23711
GA03_St4_135m	135	0.636478	0.758579	0.622	0.0135099	0.162929	0.101613	0.716418	0.52592	0.984208	0.804543	0.785107	1.38252	0.671908	0.75513	0.000269121	0.000857006	0.321947
GA03_St4_184m	184	0.48841	0.899332	0.813551	0.0214695	0.0744275	0.122333	0.811496	0.760803	1.11763	0.858067	0.794762	1.44474	0.782607	0.966395	0	0	0.209333
GA03_St6_64m	64	0.12268	0.182296	0.207121	0.00313627	0.702838	0.272748	0.663583	0.178375	0.873818	0.683426	0.770311	1.25214	0.751705	0.620416	0.000780944	0	0.273234
GA03_St6_89m	89	0.110835	0.176428	0.182394	0.00486697	0.719338	0.296733	0.697324	0.167157	0.850512	0.720118	0.800878	1.35455	0.810575	0.611482	0.000161586	0	0.259904
GA03_St6_111m	111	0.158685	0.218512	0.227697	0.00743237	0.665048	0.312964	0.736743	0.21837	0.936373	0.777551	0.781529	1.48097	0.809765	0.684672	9.87034e-05	0	0.243638
GA03_St6_139m	139	0.684072	0.682131	0.7866	0.0803859	0.376206	0.196302	0.751247	0.648829	1.17378	0.713017	0.793842	1.43567	0.709943	0.867235	0.000457518	0.000746681	0.25798
GA03_St6_160m	160	0.904562	0.861396	0.851959	0.0756467	0.303075	0.152253	0.876304	0.777383	1.38521	0.759016	0.86051	1.62263	0.642249	1.05681	0	0	0.230706
SPGT15_14m	14	0.0299875	0.193443	0.128423	0.00124234	1.63815	0.274306	0.501563	0.227318	1.01837	0.0458615	0.977869	1.04921	0.262177	0.949222	0.000577448	0.000135482	0.692004
SPGT15_31m	31	0.0326171	0.190358	0.128842	0	1.64192	0.285106	0.486735	0.218595	1.02955	0.0396453	0.945701	1.00937	0.235008	0.906157	0.000615268	0.000168281	0.648647
SPGT15_51m	51	0.0217096	0.196547	0.119983	0.00228938	1.84432	0.265463	0.547617	0.232208	1.07649	0.0400926	0.988426	1.09028	0.239421	0.975309	0.00121614	0	0.681857
SPGT15_76m	76	0.0305162	0.181557	0.117524	0.000605107	1.68208	0.290658	0.467521	0.226483	1.07503	0.0361258	1.04077	0.951923	0.233805	0.926769	0.00108485	0	0.887997
SPGT15_100m	100	0.0289631	0.229219	0.133986	0.00208355	1.85457	0.293834	0.513031	0.237376	1.0717	0.06204	0.959469	1.20222	0.235644	0.982245	0.00103762	0	0.597705
SPGT15_202m	202	1.30159	1.29244	1.00541	0.0404502	0.0453746	0.0511077	0.440659	1.03261	1.53045	0.173771	1.07823	0.871211	0.16184	1.29562	0.00035034	0	0.562348
SPGT19_15m	15	0.0218964	0.150387	0.0981223	0.00100594	2.18549	0.30522	0.354747	0.381178	1.02755	0.0255237	1.03129	0.957346	0.285443	0.9421	0.00110212	0.000164539	0.675666
SPGT19_32m	32	0.0219448	0.143617	0.106515	0	2.33936	0.301353	0.398406	0.357414	1.05284	0.0317561	1.02283	1.0901	0.244823	0.961218	0.000908221	0.000745332	0.46867
SPGT19_51m	51	0.0106503	0.204289	0.0872255	0	3.23032	0.344686	0.527995	0.42421	1.28951	0.0292396	0.973298	1.37652	0.28301	1.16723	0.00808626	0	0.46982
SPGT19_77m	77	0.0205735	0.1369	0.121521	0.00130174	2.26269	0.327847	0.384221	0.333185	1.11175	0.0224081	1.0039	1.01983	0.222507	1.08916	0.00103725	0.000852872	0.484187
SPGT19_100m	100	0.025181	0.153932	0.105326	0.0009273	2.20549	0.34001	0.345018	0.32323	1.07054	0.027127	1.0205	1.01087	0.231608	0.910706	0.00184721	0.00121202	0.438112
SPGT19_201m	201	1.40115	1.26533	1.11265	0.0942222	0.0133333	0.0129155	0.322533	0.848254	1.31139	0.113035	0.987965	0.639506	0.189336	1.1994	0	0	1.3571
SPGT3_16m	16	0.0147836	0.133436	0.166251	0.00261318	1.67806	0.403983	0.425646	0.17989	1.14841	0.0289595	0.925878	0.991941	0.247615	0.91599	6.50693e-05	0	0.473199
SPGT3_32m	32	0.0150948	0.164737	0.133231	0.00393082	2.43975	0.328943	0.67307	0.251419	1.34925	0.0429883	0.935155	1.57685	0.242739	1.0348	0.000854216	0	0.487993
SPGT3_51m	51	0.0120372	0.155674	0.156444	0.000594177	1.81818	0.304198	0.446131	0.250403	1.03513	0.0276691	0.931942	0.97434	0.238234	0.883492	0.000236724	0.000194389	0.55914
SPGT3_75m	75	0.0137166	0.136966	0.146535	0.00301023	1.73441	0.295878	0.440604	0.222696	1.02531	0.0269573	0.924398	0.97169	0.246527	0.842348	0.000513984	0	0.677963
SPGT3_103m	103	0.0243881	0.202073	0.190599	0.0028528	1.55563	0.330388	0.446115	0.226695	1.14051	0.0374696	1.06025	0.932588	0.26319	0.888442	0.000378857	0	0.74835
SPGT3_203m	203	1.49592	1.0995	1.13799	0.271219	0.0255265	0.00999969	0.152707	0.823723	1.28357	0.111758	1.01371	0.475667	0.0689894	1.29936	0	0	0.589039
SPGT8_15m	15	0.0163518	0.100531	0.0807699	0.00126454	2.51669	0.329646	0.550676	0.307103	1.15961	0.0162314	1.13847	1.07993	0.243138	0.954967	0.00226711	0	0.671762
SPGT8_28m	28	0.0192426	0.0917659	0.0831498	0	2.41726	0.2849	0.453634	0.36352	1.13011	0.017176	1.14248	0.861932	0.206494	0.879431	0.00217384	0	0.695416
SPGT8_50m	50	0.0115211	0.0810224	0.074596	0	2.71884	0.296275	0.517035	0.339184	1.00696	0.0226898	0.975146	1.20832	0.243283	0.903612	0.00199669	0.000546231	0.409271
SPGT8_75m	75	0.0200748	0.102295	0.0812441	0	2.20459	0.358258	0.452075	0.278609	0.900327	0.0148956	0.913487	1.02727	0.205276	0.916213	0.000662685	0	0.438605
SPGT8_100m	100	0.0235421	0.0993049	0.0609893	0.00248262	3.38878	0.320407	0.562404	0.310328	1.02157	0.0296432	0.883018	1.41372	0.264789	1.00462	0.00445092	0.00162498	0.284998
SPGT8_204m	204	0.921335	1.1607	0.761198	0.0179416	0.0159028	0.0177743	0.377125	0.767324	1.0732	0.0966461	0.908288	0.495861	0.163443	1.0375	8.12279e-05	0.00026745	2.27456
GA03_St7_33m	33	0.00483223	0.0801102	0.101186	0.000233558	1.07665	0.297636	0.935665	0.120115	0.903023	0.608365	0.885434	1.69286	0.866619	0.691506	9.30508e-05	0	0.316518
GA03_St7_57m	57	0.00908756	0.0909211	0.0952093	0	1.22704	0.269171	1.22549	0.130593	1.03313	0.845686	0.917309	2.03064	0.92641	0.706206	0.000131245	0	0.27934
GA03_St7_72m	72	0.0103251	0.154287	0.0948527	0.00113169	0.72813	0.161854	0.908988	0.11135	0.963623	0.724676	0.85422	1.58734	0.940035	0.711264	3.75727e-05	0	0.468722
GA03_St7_151m	151	0.121348	0.580652	0.399464	0.00790003	0.498348	0.099134	0.96975	0.369352	1.06643	0.835559	0.912626	1.65881	0.950079	0.832338	0.000143065	0.000237025	0.589984
GA03_St7_201m	201	0.434708	0.639205	0.62812	0.0284091	0.647727	0.19425	1.02368	0.634131	1.11219	0.852273	0.790902	1.91586	0.561848	1.08937	0	0	0.398499
GA03_St8_31m	31	0.145775	0.220233	0.223085	0.00678944	0.666554	0.281443	0.687716	0.174131	0.787648	0.684771	0.758906	1.38107	0.821005	0.617367	0.000929829	0	0.263245
GA03_St8_68m	68	0.116959	0.24602	0.172184	0.00361795	0.83068	0.212335	0.873495	0.179605	0.840595	0.860387	0.722121	1.56815	0.809201	0.58812	0.00120118	0	0.337977
GA03_st8_111m	111	0.403606	0.718818	0.572428	0.00815809	0.190355	0.0890959	0.78821	0.573008	0.952741	0.933242	0.711281	1.62406	0.925412	0.728707	0	0.00029916	0.318284
GA03_st8_135m	135	0.345472	0.92608	0.836566	0.0249169	0.0523256	0.152625	0.809685	0.719328	1.03732	0.821887	0.773284	1.66497	0.99165	0.874903	0	0	0.152208
GA03_St8_186m	186	0.308916	0.881859	0.710407	0.0279955	0.0940649	0.282348	0.858634	0.817869	1.01975	0.783875	0.80409	1.44125	0.956257	0.899225	0	0	0.0785395
Med_15	15	0.167068	1.02713	0.268853	0.0387597	2.09302	0.695687	1.24507	0.567553	1.28649	0.439662	0.916553	1.50732	1.0167	1.18902	0	0	0.0350766
Med_30	30	0.109958	0.204082	0.235933	0.085034	1.71202	0.377929	0.817087	0.516278	0.926328	0.533049	0.870348	1.328	1.00347	1.09713	0	0	0.0846492
Med_60	60	0.190162	1.50735	0.839425	0.0735294	0.882353	0.188537	0.934522	0.866597	1.18899	1.10843	1.08997	1.49782	0.863151	1.2605	0	0	0.249534
Med_75	75	0.844828	1.61	1.17919	0.22	0.346667	0.17094	0.717877	0.889286	1.03404	0.814925	0.924706	1.20988	0.321337	1.37594	0.00199203	0	0.19457
Med_90	90	1.0539	1.95055	1.15131	0.10989	0.164835	0.30525	0.859476	0.873234	1.15735	0.76267	1.0084	1.05142	0.1577	1.47484	0	0	0.186465
