# Supplementary material for: Associations between picocyanobacterial ecotypes and cyanophage host genes across ocean basins and depth
Source: PeerJ. 2023 Feb 28;11:e14924. doi: 10.7717/peerj.14924 (PMC9983427; doi:10.7717/peerj.14924)
Supplement: Table S5 — Abundance of cyanophage cobS phylotypes as normalized reads. The phylogenetic tree with each phylotype designated can be seen in Figure S9. [file peerj-11-14924-s007.xlsx]

## Sheet: cobS phylotypes
Name	Depth(m)	Station	cyanophage 1 normalized reads	cyanophage 10 normalized reads	cyanophage 11 normalized reads	cyanophage 12 normalized reads	cyanophage 13 normalized reads	cyanophage 14 normalized reads	cyanophage 15 normalized reads	cyanophage 16 normalized reads	cyanophage 17 normalized reads	cyanophage 18 normalized reads	cyanophage 19 normalized reads	cyanophage 2 normalized reads	cyanophage 20 normalized reads	cyanophage 3 normalized reads	cyanophage 4 normalized reads	cyanophage 5 normalized reads	cyanophage 6 normalized reads	cyanophage 7 normalized reads	cyanophage 8 normalized reads	cyanophage 9 normalized reads	Total normalized reads
HOT272_5m	5	Aloha	5.85907	1.51902	1.73602	7.48658	1.19351	0	2.49553	1.19351	6.18457	7.26958	1.41052	10.8501	14.2137	3.36354	202.897	0	100.147	4.34005	153.963	11.2841	537.407
HOT272_25m	25	Aloha	2.15346	2.15346	1.07673	5.92202	1.07673	0	2.15346	2.51237	6.8193	8.61385	1.97401	9.15222	11.4851	2.87128	172.636	0	79.6781	3.05074	123.465	12.3824	449.176
HOT272_45m	45	Aloha	5.03991	2.38374	1.77078	6.60637	1.22592	0	3.54156	2.17942	5.72098	10.9652	2.9967	7.96851	14.3706	3.26913	178.236	0.817283	80.0937	4.76748	136.759	16.6862	485.398
HOT272_75m	75	Aloha	10.0926	7.37263	2.72	39.3684	4.65263	0.930527	9.59158	3.57895	18.4674	32.8547	26.6274	26.1979	25.6969	7.22948	420.813	3.79369	133.996	9.94948	228.623	47.1705	1059.73
HOT272_100m	100	Aloha	8.33057	5.10584	4.43401	37.7563	4.03092	1.07491	15.3175	3.22474	17.0642	24.1855	19.2141	37.4876	29.0226	7.92748	374.876	3.49347	135.842	7.52439	208.802	36.6814	981.395
HOT272_125m	125	Aloha	12.5972	4.95954	5.20752	27.4759	3.37249	0.942313	9.57191	2.23179	14.829	18.0527	16.1185	39.23	21.6236	6.54659	349.796	2.87653	121.509	8.23284	199.225	25.74	890.138
HOT272_150m	150	Aloha	75.7792	2.52798	24.6779	17.094	1.2038	2.34741	8.54698	1.62513	6.13938	6.25976	21.1267	107.499	31.359	14.1446	124.834	9.02849	25.1594	14.3854	66.1488	8.30622	568.193
HOT272_175m	175	Aloha	78.6636	1.36569	15.842	7.10158	0	2.45824	3.00451	0	5.46275	3.55079	10.9255	98.0564	20.4853	10.6524	53.2618	7.10158	8.19413	13.3837	22.3973	3.00451	364.912
HOT272_200m	200	Aloha	17.0042	2.17306	2.33604	6.13889	0	0	3.74852	4.67207	2.55334	2.49902	1.08653	57.0971	6.35619	6.24754	86.3247	1.08653	13.7446	11.7345	47.264	4.34611	276.413
HOT272_225m	225	Aloha	22.0925	2.69832	1.74267	4.8345	0	0	2.19239	11.6927	1.57402	1.68645	0	49.5255	3.31669	5.39665	46.6585	1.23673	9.50035	7.75768	29.0632	3.76641	204.735
HOT272_250m	250	Aloha	19.4978	0	1.26609	1.19374	0	0	1.30227	1.1214	0	0	0	20.1128	1.84488	2.82158	9.18822	1.08522	1.44696	4.26854	3.79828	0.940526	69.8883
HOT275_5m	5	Aloha	3.12991	5.81269	1.87795	10.3734	4.02417	0	3.75589	2.68278	5.45499	19.1372	1.87795	7.15408	25.1287	2.4145	110.978	0	99.3523	3.21934	102.393	31.8357	440.602
HOT275_25m	25	Aloha	2.28751	4.3761	0	8.45382	2.58588	0	4.17718	2.58588	3.18262	19.7919	2.48642	4.87338	20.2892	0.895111	93.9866	1.29294	84.3393	2.08859	82.5491	37.2963	377.538
HOT275_45m	45	Aloha	8.01639	44.4719	3.34016	106.79	37.3144	0	25.767	9.63876	23.572	191.248	15.7465	12.5018	63.0814	5.4397	258.529	1.90866	210.621	6.58489	194.779	202.032	1421.38
HOT275_75m	75	Aloha	7.3882	28.9584	3.39688	99.9531	14.8613	0	39.6585	7.3882	29.8076	127.383	25.3067	14.182	49.1698	6.1993	310.729	6.1993	140.716	7.72789	186.319	130.1	1235.44
HOT275_100m	100	Aloha	40.5539	4.89782	19.7872	51.0353	2.84073	17.7301	19.8851	182.199	15.9669	23.9013	49.0761	220.794	101.581	35.6561	206.394	20.277	21.8443	13.9098	40.6519	27.036	1116.02
HOT275_150m	150	Aloha	38.2814	0	2.49948	0.92086	0	0	1.05241	0	0	0	1.05241	20.7851	2.23637	3.81499	8.94549	1.18396	1.57862	5.26205	2.89413	0	90.5073
HOT275_175m	175	Aloha	16.9345	0	0	0.872164	0	0	0	0	0	0	0	12.1376	1.38093	1.67165	6.25051	0	0	2.54381	2.25309	0	44.0443
HOT275_200m	200	Aloha	22.9744	0	0.897851	0	0	0	0	0	0	0	0	15.7388	0	2.05978	5.59837	0.845037	0	3.43296	1.63726	0	53.1845
HOT278_5m	5	Aloha	6.14855	17.6437	2.67328	22.9902	8.28718	0.801985	9.89115	6.95054	22.7229	32.8814	12.0298	13.3664	9.62382	1.8713	240.596	1.8713	151.843	5.34657	125.644	42.2379	735.42
HOT278_25m	25	Aloha	5.87217	19.1433	2.81864	30.7702	6.10705	1.05699	12.0967	5.63728	23.841	39.2261	10.9222	14.4455	12.6839	5.05006	289.498	2.7012	186.97	7.8687	169.236	44.511	890.455
HOT278_45m	45	Aloha	10.6849	24.2079	3.58945	36.7293	6.42763	1.16866	16.6951	9.85013	28.9661	48.4994	15.276	14.5248	17.196	6.59458	352.685	4.00683	225.969	10.2675	210.86	51.5045	1095.7
HOT278_75m	75	Aloha	13.4579	16.7403	6.23659	111.79	39.1077	4.59538	23.6803	40.8895	56.9265	78.4498	41.8274	48.9549	37.654	16.0838	458.085	8.58118	136.971	11.676	153.336	135.236	1440.28
HOT278_100m	100	Aloha	50.0432	3.93741	29.4671	72.4611	12.6378	25.2121	16.4482	62.8081	31.6263	33.2775	66.1104	325.916	95.006	48.7731	298.227	20.8302	28.451	23.1164	58.1086	42.2954	1344.75
HOT278_125m	125	Aloha	105.252	2.58249	12.7865	22.1716	2.70846	18.7703	11.3378	12.0306	10.4559	14.5501	26.7067	191.734	38.6743	43.2724	140.084	15.7469	10.5189	23.6833	24.1872	12.4715	739.725
HOT278_150m	150	Aloha	35.0713	0	3.92494	8.92608	0	4.17816	3.73503	5.50758	3.79833	6.52047	5.44427	84.956	15.5732	17.7888	45.3901	4.17816	4.558	9.05269	8.35633	3.92494	270.884
HOT278_175m	175	Aloha	11.3533	0	1.73775	5.38701	0	0	1.1585	2.43284	1.3902	2.66454	1.96944	51.5531	9.3259	6.89306	15.1763	1.1585	1.96944	4.22851	3.07002	1.79567	123.264
HOT278_200m	200	Aloha	18.0182	0	2.03146	3.53298	0	0	1.05989	3.53298	1.67817	2.73806	1.41319	84.6149	9.27407	10.5106	26.4974	2.56141	3.00303	7.15428	4.06293	1.23654	182.92
ETNP_60m	60	St 136	4.66734	0	2.44306	3.06294	0	0	1.45854	2.18781	1.09391	2.44306	3.02648	44.5949	8.09491	2.84416	11.8871	0.984516	1.78671	6.78222	2.26074	0	99.6185
ETNP_70m	70	St 136	46.3416	2.38556	15.1969	7.33338	1.28113	2.51809	3.93175	6.84743	4.992	3.93175	8.96793	215.23	12.4137	25.7994	70.1972	9.54223	7.24502	18.731	6.97996	4.85947	474.726
ETNP_90m	90	St 136	138.005	1.85176	7.74816	4.53194	1.07207	3.55733	3.31368	1.55938	2.68018	4.04464	7.50451	62.1315	4.58067	22.2211	30.7003	4.97052	3.26495	26.7043	5.06798	3.80098	339.311
ETNP_100m	100	St 136	173.091	1.76909	1.02421	4.28305	2.14153	9.12477	1.21043	6.89013	1.02421	5.6797	13.0354	9.12477	1.58287	5.58659	10.4283	0.931099	0	26.3501	2.51397	2.51397	278.305
ETNP_110m	110	St 136	271.356	0	0	1.54443	0	13.1276	1.54443	10.1932	0	6.94992	10.6565	4.01551	0.926656	3.08885	4.01551	0	1.23554	30.8885	1.0811	0	360.623
ETNP_120m	120	St 136	267.028	0	0	1.94556	0	16.9889	1.11175	19.6988	0	6.63576	8.85926	3.50896	0	2.74463	3.50896	0	1.59814	28.3496	1.07701	0	363.056
ETSP_St9_80m	80	St 9	18.7859	0	0	0	0	0	0	0	0	0	0	1.33963	0	0	3.89426	0	0	1.4954	0	0	25.5152
ETSP_St9_100m	100	St 9	9.53135	0	0	0	0	0	0	0	0	0	0	0	0	0	0	0	0	0	0	0	9.53135
ETSP_St9_110m	110	St 9	9.89009	0	0	0	0	0	0	0	0	0	0	0	0	0	0	0	0	0	0	0	9.89009
ETSP_St9_120m	120	St 9	5.56711	0	0	0	0	0	0	0	0	0	0	0	0	0	0	0	0	0	0	0	5.56711
GA03_St1_30m	30	St 1	9.28826	5.38563	5.38563	9.99074	1.95132	1.79521	9.21021	3.43432	5.7759	21.2303	2.49768	21.8547	14.1275	3.12211	92.4143	2.49768	54.5588	77.4282	48.939	14.1275	405.015
GA03_St1_57m	57	St 1	5.81187	2.70129	1.39158	3.43801	0.982288	0	4.66587	1.47343	1.146	9.16802	0	10.3959	4.82958	1.22786	16.1259	0	7.94016	13.6702	8.10388	5.73002	98.8018
GA03_St1_89m	89	St 1	6.50753	0	0.86767	0	0	0	1.59073	0	0	2.31379	1.44612	7.80903	2.16918	0.723059	3.32607	1.01228	1.44612	5.06141	0.86767	0.86767	36.0083
GA03_St10_41m	41	BATS	3.87017	1.93508	1.53472	7.67361	2.53563	0	4.80435	20.4852	6.53925	9.07488	3.87017	6.80616	15.4139	1.7349	28.0921	1.7349	15.4807	4.00362	23.7548	9.94233	169.286
GA03_St10_75m	75	BATS	3.5115	1.35058	2.02586	8.9138	2.49857	1.4181	4.59196	27.7543	8.9138	11.4124	3.9842	4.59196	16.9497	1.35058	33.6969	1.55316	19.8535	6.07759	32.6839	16.2069	209.339
GA03_St10_89m	89	BATS	9.6304	3.52156	4.67146	20.9857	9.27106	2.08419	14.5893	13.8707	6.61192	34.9282	15.308	25.8009	32.9159	4.31212	51.0986	4.16838	20.77	6.61192	54.5483	50.8112	386.51
GA03_St10_109m	109	BATS	16.1986	0	3.84917	2.80669	0.962293	0	1.68401	1.20287	0.882102	1.12268	5.85395	30.0717	6.01433	3.36803	9.38236	1.60382	2.56611	3.20764	3.20764	2.88688	96.8708
GA03_St10_182m	182	BATS	27.8655	0.943141	5.48736	10.889	2.5722	1.11462	7.45938	1.7148	2.31498	4.02978	19.806	123.294	18.6913	11.5749	28.38	4.11552	3.08664	11.1462	7.20216	2.1435	293.831
GA03_St14_99m	69	St 14	1.06062	0	1.06062	4.04966	10.0277	0	3.56756	22.3695	8.9671	2.12125	0	2.31409	22.1031	6.22161	66.0637	5.56671	8.84124	6.22161	39.3763	1.88286	211.815
GA03_St14_69m	99	St 14	7.28584	1.06422	4.74807	43.0601	49.5273	2.53776	10.2329	29.5527	6.63093	3.68385	18.0918	54.1117	4.82102	1.25347	41.8465	0.964204	28.7333	4.33892	39.6288	0.674943	352.788
GA03_St14_113m	113	St 14	15.1261	3.5331	10.4889	49.5738	25.8358	11.3722	10.7097	11.0409	7.50783	6.51415	46.9239	111.624	35.2206	17.6655	84.3527	17.1134	5.07883	6.95578	31.5771	5.07883	513.293
GA03_St14_133m	133	St 14	47.7743	15.4009	20.2727	22.3156	8.32908	14.458	10.2149	2.67159	3.77166	7.54332	62.5467	121.636	28.2874	27.1874	61.6038	13.8294	4.71457	11.7864	19.9584	8.32908	512.631
GA03_St14_183m	183	St 14	87.953	4.85684	8.21248	5.47499	4.59192	1.76612	7.59434	0	1.14798	1.67782	13.7758	12.8927	10.1552	8.65401	17.308	6.88789	1.14798	9.53707	6.44636	4.85684	214.937
GA03_St16_39m	39	St 16	1.78117	0	0.854962	1.78117	1.63868	0	0	1.56743	2.06616	0.997456	0	0	1.63868	0	11.257	0	5.84224	8.47837	16.173	0	54.0764
GA03_St16_60m	60	St 16	1.65779	0	0	1.95034	2.14538	0	1.26772	2.34041	2.14538	2.53545	0	0	2.04786	0	11.7021	0	8.67903	7.50882	14.7251	0	58.7053
GA03_St16_89m	89	St 16	6.17937	3.79697	2.82911	37.7463	51.4452	0.818953	16.4535	24.8664	15.3368	9.00849	9.15739	12.9544	20.4738	1.86126	63.5061	2.23351	26.281	5.13707	72.2912	9.67854	392.055
GA03_St16_110m	110	St 16	13.514	4.39205	12.4329	66.6915	35.1364	8.3111	18.7169	24.9333	9.52736	8.9868	39.8663	87.4355	48.9882	10.7436	89.8004	8.85166	12.2977	7.70297	40.4744	7.6354	556.438
GA03_St16_135m	135	St 16	119.403	7.87653	12.0588	25.3722	8.71298	18.9594	16.5198	1.882	7.04008	6.76127	38.9644	91.7302	37.6401	22.5143	88.5935	18.3321	7.17949	22.2355	17.4957	8.50386	577.775
GA03_St18_38m	38	St 18	1.8069	2.77984	0.555969	11.4669	4.86473	0	4.93422	9.79895	6.39364	17.235	4.03077	0.833953	11.8838	0	21.1268	0	15.3586	2.50186	27.8679	11.4669	154.907
GA03_St18_65m	65	St 18	1.98904	3.87339	0.314058	15.9123	6.17648	0	5.33899	10.992	5.96711	23.2403	5.65305	1.46561	14.342	0	20.0997	0	18.8435	3.97807	28.1606	12.2483	178.595
GA03_St18_75m	75	St 18	2.69302	1.73449	0.958533	8.26164	4.83831	0	3.2864	8.48986	5.70555	14.0585	4.74702	1.04982	9.03759	0	20.3118	0	17.4818	3.19511	21.2247	9.72226	136.796
GA03_St18_113m	113	St 18	53.0052	9.22683	28.7929	70.15	18.5845	21.5947	42.535	6.74016	14.2001	18.1919	86.9677	124.529	85.7898	26.2408	151.817	16.2942	29.3819	13.8075	64.2606	46.7885	928.899
GA03_St18_184m	184	St 18	105.309	2.42263	10.8261	4.92097	1.28702	2.1198	5.14809	0.529951	1.89268	2.1198	8.4035	39.5192	13.0216	8.47921	16.9584	4.69385	2.87687	11.8103	3.63395	3.48253	249.455
GA03_St18_233m	233	St 18	57.219	0	4.34574	1.23129	0	0	0	0.941578	0	0	1.52101	9.34335	2.17287	3.33174	6.08404	1.59344	0	6.30133	1.23129	0	95.3166
GA03_St20_39m	39	St 20	8.49621	15.1183	3.3735	26.988	13.1192	0	17.992	108.826	21.4904	99.2058	16.2428	9.12093	41.4815	2.99866	95.3325	1.37439	75.9661	5.24766	77.8403	65.2209	705.436
GA03_St20_74m	74	St 20	14.4739	28.9477	9.84222	73.3824	30.974	2.89477	27.3556	15.487	53.2638	157.186	50.2243	20.6976	67.5929	9.69748	279.345	3.47372	118.541	20.8423	118.107	168.91	1271.24
GA03_St20_99m	99	St 20	42.8573	8.44746	36.8123	50.1422	10.7724	10.8499	34.5648	8.21496	16.0424	27.2799	73.3146	140.429	83.5446	19.2199	127.487	11.8574	19.1424	17.9024	33.7123	50.6847	823.278
GA03_St20_134m	134	St 20	157.386	9.03776	20.7868	7.87576	4.7771	5.87454	9.29598	1.54933	3.09866	4.7771	21.8843	33.5043	20.6577	17.8819	36.9257	14.9123	3.48599	18.8502	8.06943	11.5554	412.186
GA03_St20_183m	183	St 20	23.9651	0	1.51678	1.03141	0	0	0.970738	0	0	0	1.03141	3.82228	1.57745	0	3.27624	0	0	3.39758	0	0	40.589
GA03_St22_50m	50	St 22	6.56	16.4	4.05684	36.5979	13.7242	1.46737	12.2568	5.52421	19.2484	74.0589	19.8526	18.8168	26.8442	4.14316	158.303	1.89895	94.861	6.56	127.143	72.2463	720.564
GA03_St22_74m	74	St 22	8.28005	17.4601	4.86003	39.8702	15.6601	1.08001	14.7601	5.94003	22.2301	67.6804	20.1601	24.0301	24.4801	5.40003	159.931	2.88002	94.3205	7.83005	122.491	69.6604	729.004
GA03_St22_84m	84	St 22	40.9871	6.7035	42.6151	63.8748	14.7477	6.60774	11.1087	4.59669	15.5138	40.1252	56.0221	260.096	52.2873	28.2505	182.527	15.418	34.954	20.1105	58.895	60.7146	1016.15
GA03_St22_123m	123	St 22	127.545	5.87884	14.1859	6.77345	2.81162	7.02905	4.60083	2.55602	2.81162	1.91701	13.6747	26.8382	14.5693	14.4415	34.8896	10.4797	2.93942	13.6747	6.26224	4.47303	318.352
GA03_St24_48m	48	St 24	13.8476	11.6693	13.0696	36.0193	10.4246	2.25607	13.692	4.9789	12.2139	85.1081	30.4958	83.1633	33.1408	10.9691	130.385	7.62395	63.87	11.5915	86.6641	43.1764	704.359
GA03_St24_71m	71	St 24	70.7579	9.88852	23.6592	27.8344	6.6656	10.035	9.66878	3.88216	9.08279	33.1082	46.4394	154.407	33.914	30.2516	102.401	19.1911	23.4395	20.949	42.3375	21.4618	699.375
GA03_St24_89m	89	St 24	220.684	28.7266	48.9943	31.0716	7.53759	26.2978	23.6178	5.10881	7.62134	16.3314	67.8383	62.1432	36.8504	44.4718	107.453	32.4116	9.21261	29.8991	21.6915	23.534	851.496
GA03_St3_28m	28	St 3	18.1507	2.97553	4.76085	6.39739	1.63654	1.04144	5.80228	14.2825	14.5801	12.646	5.50473	11.9021	22.4652	3.12431	48.2036	2.82675	27.0773	20.9775	30.0528	9.67047	264.078
GA03_St3_61m	61	St 3	21.2951	1.54873	5.03338	6.06587	2.19404	1.16155	4.6462	10.9702	10.583	7.6146	5.03338	9.67958	10.1958	1.54873	35.2337	3.22653	24.6507	9.80864	23.8763	4.6462	199.012
GA03_St3_86m	86	St 3	54.4708	3.21873	9.77998	4.95189	2.72354	1.98076	3.09493	3.34252	2.22835	3.09493	9.53238	18.322	18.4458	4.95189	27.3592	7.05644	8.7896	10.2752	11.8845	5.69467	211.198
GA03_St3_108m	108	St 3	81.8968	6.23128	11.5724	3.56073	1.78036	0.890182	5.34109	0.890182	2.67055	6.23128	10.6822	29.376	16.0233	6.23128	36.4975	8.01164	4.45091	9.792	12.4626	2.67055	257.263
GA03_St3_135m	135	St 3	21.7339	0	3.84361	0	0	0	0	1.25791	0	0	1.95675	11.5308	2.1664	2.02663	5.59071	1.46756	1.18803	3.35443	1.39768	0	57.5144
GA03_St4_39m	39	St 4	18.6615	10.6276	6.76875	11.7662	2.97319	1.64474	7.84416	7.71764	18.0922	20.8756	6.76875	12.9682	24.5446	2.59363	64.5246	3.22623	41.4982	17.2698	46.3691	21.5714	348.306
GA03_St4_65m	65	St 4	20.832	11.0865	6.70557	13.1429	2.95045	1.96697	8.76194	8.67253	20.7426	25.0341	7.0632	14.2158	28.521	3.39749	75.3706	4.38097	40.6804	18.5074	49.2636	25.7494	387.045
GA03_St4_91m	91	St 4	20.7885	10.4445	5.82481	9.74149	2.30984	1.1047	6.62823	6.5278	19.0813	21.6924	8.53635	11.6496	25.4082	2.10898	74.4169	3.81625	46.2972	18.1774	47.5023	20.5877	362.644
GA03_St4_111m	111	St 4	32.9369	3.07411	6.69717	7.79507	2.52516	1.86642	8.4538	12.2964	10.979	8.23422	7.79507	18.774	17.5663	5.81885	53.9067	5.48948	32.2782	10.6496	32.388	11.9671	291.492
GA03_St4_135m	135	St 4	42.5468	4.47225	11.1202	11.2411	2.78005	3.62615	4.47225	3.74702	4.83487	3.50528	14.6255	39.525	18.2516	3.86789	22.9656	6.88969	6.16446	5.07661	15.109	5.5601	230.381
GA03_St4_184m	184	St 4	24.4237	1.49533	5.60749	1.49533	0	0	3.23988	1.99377	1.49533	1.86916	3.36449	66.293	3.61371	5.48288	10.3427	1.99377	1.49533	6.47976	5.7321	2.11838	148.536
GA03_St6_64m	64	St 6	14.6729	10.8404	4.37997	14.0159	2.51848	0	10.7309	4.48947	14.6729	26.4988	4.70847	10.4024	13.7969	2.08049	60.8816	2.62798	40.6242	22.2284	38.9818	27.4843	326.636
GA03_St6_89m	89	St 6	9.85926	11.851	3.28642	13.6436	2.09136	0	10.5564	3.4856	12.1498	21.9095	4.78025	9.75967	19.5193	1.693	54.4749	2.39012	37.2461	18.623	43.4206	23.3037	304.044
GA03_St6_111m	111	St 6	27.9008	12.7093	7.84401	18.4682	4.26952	1.0922	11.9149	7.84401	25.22	32.2697	5.26244	16.7802	20.9505	4.26952	126.298	4.07094	69.1067	33.9576	54.5109	33.4611	518.201
GA03_St6_139m	139	St 6	25.4112	2.38603	4.17555	5.72647	3.93695	1.07371	4.05625	1.07371	0	3.93695	3.22114	25.0533	11.3336	3.22114	14.4355	1.55092	3.57904	13.3618	7.99319	6.08437	141.611
GA03_St6_160m	160	St 6	40.5586	1.9588	6.79818	5.87639	0	1.15223	3.9176	0	0	2.53491	3.34148	27.5384	9.79399	3.11103	14.2877	2.18924	2.65014	10.1397	4.72416	2.65014	143.223
SPGT15_14m	14	GT 15	6.14181	26.4865	3.37799	34.2406	22.1873	0.921271	27.4846	62.9535	8.75208	29.02	22.1873	22.1873	17.888	5.37408	144.409	7.21662	66.6386	9.36626	75.6978	43.223	635.754
SPGT15_31m	31	GT 15	3.96758	23.1001	3.6149	27.5085	19.4852	1.14619	28.5665	62.6877	7.31797	28.302	18.6035	23.5409	16.5756	3.87941	140.805	3.87941	70.5347	8.6405	70.0057	33.2395	595.401
SPGT15_51m	51	GT 15	4.52937	28.9183	2.43889	27.4085	21.0209	1.16138	33.3315	50.2876	7.0844	25.5503	19.9757	21.4855	11.6138	6.96826	129.494	4.52937	71.7731	8.59419	59.4625	37.0479	572.675
SPGT15_76m	76	GT 15	4.72313	27.0596	2.65676	32.1763	17.2197	1.67277	31.5859	47.0345	6.7895	24.698	15.1534	20.3685	13.8742	4.72313	126.836	6.98629	85.1147	9.15106	68.0918	29.3228	575.238
SPGT15_100m	100	GT 15	5.72865	32.7944	2.0756	32.4623	20.673	0	29.2244	44.999	5.97772	23.4958	20.2578	25.4053	14.5292	4.81539	143.631	5.31353	73.9743	6.72494	62.351	35.2852	589.719
SPGT15_202m	202	GT 15	62.9561	0	8.27863	17.7124	1.829	0	24.8359	1.73274	1.73274	1.25142	14.3432	26.5686	3.46547	5.67953	17.4236	2.98416	1.829	9.53006	6.25711	1.0589	209.469
SPGT19_15m	15	GT 19	2.9324	14.4274	1.75944	13.7236	10.9085	0	15.2485	22.3449	5.45426	14.3688	13.2544	14.1928	6.68587	2.9324	107.619	5.39562	59.3518	7.56559	55.7742	13.8996	387.839
SPGT19_32m	32	GT 19	2.44422	11.4573	1.14573	17.2623	9.62413	0	12.4503	20.2412	4.12463	13.6724	12.6794	11.6864	8.0201	2.74975	95.6302	5.4995	60.2654	5.27035	52.3216	19.3246	365.87
SPGT19_51m	51	GT 19	10.1182	19.0319	3.97501	23.7296	18.4296	1.325	40.8342	31.0774	11.2023	11.6841	20.116	25.0546	11.0819	5.66138	188.873	10.1182	67.3343	15.7796	106.241	32.1615	653.829
SPGT19_77m	77	GT 19	7.03585	30.1674	4.04803	26.1194	29.9747	2.21678	27.0832	62.4553	7.90329	26.6977	22.2641	31.4204	14.5536	2.98783	228.135	8.19243	123.658	15.1319	110.55	29.2036	809.798
SPGT19_100m	100	GT 19	2.49931	13.186	1.72366	12.0656	8.61832	0	10.9453	13.4446	2.32695	10.342	9.2216	11.4624	5.94664	2.84404	96.6975	3.27496	53.4336	4.65389	39.2995	13.7031	315.689
SPGT19_201m	201	GT 19	199.589	0	9.84446	61.2897	2.69929	1.27025	52.3979	4.12832	4.12832	1.7466	39.0603	43.9825	7.46274	13.4964	57.6377	5.87492	3.81076	15.4018	19.0538	0.95269	543.827
SPGT3_16m	16	GT 3	15.1457	19.3399	3.14565	47.7673	52.078	2.21361	70.4859	29.5924	12.3496	73.5151	29.2429	31.6895	53.7091	12.4661	347.769	7.57287	188.739	16.0778	113.011	80.5054	1206.42
SPGT3_32m	32	GT 3	7.73748	19.5758	3.09499	46.5796	52.3827	0.928497	77.2974	31.6463	11.2193	76.601	24.3731	28.0097	58.8822	7.19585	248.992	7.11848	111.729	16.4035	98.1886	75.363	1003.32
SPGT3_51m	51	GT 3	7.25333	14.3672	3.48718	38.2195	37.2431	2.78974	49.518	22.039	6.97436	45.7518	23.8523	20.3651	40.0328	11.5774	194.166	3.62667	95.4092	10.4615	83.1344	53.8421	764.111
SPGT3_75m	75	GT 3	7.27164	20.6668	2.42388	37.1236	60.4694	2.16873	55.1114	22.0701	6.76135	56.7698	23.6009	21.6873	53.7081	8.54736	223.635	8.29222	119.536	11.4815	82.9222	82.4119	906.658
SPGT3_103m	103	GT 3	10.4631	13.7673	3.7447	31.9401	41.7424	1.32166	53.3069	27.2041	4.84608	47.9101	20.3756	30.7286	38.8788	9.47189	181.838	5.61705	91.635	11.2341	74.894	48.9014	749.821
SPGT3_203m	203	GT 3	517.088	0.902422	28.7486	20.8846	1.03134	1.41809	13.2785	2.44943	6.31695	3.35185	31.3269	31.8426	5.28561	16.6303	55.4345	8.8953	2.32051	26.9437	5.02778	1.67593	780.853
SPGT8_15m	15	GT 8	1.524	11.8872	1.3208	18.5928	13.3096	0	28.0416	18.796	3.2512	14.3256	10.4648	2.9464	5.2832	1.7272	71.2216	2.7432	45.0088	3.4544	44.2976	11.8872	310.083
SPGT8_28m	28	GT 8	1.60139	10.4561	1.22459	14.6009	8.94892	0	30.8031	24.9628	3.95636	13.6589	13.1879	4.23896	5.36935	2.82597	84.5908	3.01437	54.3529	3.67377	47.6648	9.89091	339.023
SPGT8_50m	50	GT 8	2.15387	12.1589	1.80647	17.8563	13.2011	0	22.7893	18.1342	4.0993	11.5336	15.494	3.54346	7.01745	2.91815	83.4451	2.01491	47.802	3.7519	43.2164	11.1167	324.053
SPGT8_75m	75	GT 8	1.15958	6.9575	0	17.7803	9.27667	0	23.3205	14.8169	2.83454	11.467	11.467	4.63833	4.50949	2.44801	65.0655	1.93264	39.5547	4.12296	37.622	8.7613	267.735
SPGT8_100m	100	GT 8	2.15854	8.87401	1.31911	12.5915	7.31506	0	14.0305	7.31506	1.9187	5.99595	12.3517	3.35773	4.437	2.03862	58.5205	1.43903	29.1403	3.59757	33.8172	8.1545	218.373
SPGT8_204m	204	GT 8	91.663	1.3375	18.9924	65.0914	20.0624	3.56665	42.9782	9.18413	4.54748	4.01249	74.3647	84.9755	7.57914	11.5916	33.7049	11.8591	3.74499	23.0049	19.7058	17.3874	549.354
GA03_St7_33m	33	St 7	4.8955	53.9714	3.68673	26.9555	3.68673	1.02745	23.7522	8.58223	11.4833	132.783	24.2357	9.54924	18.4337	3.74717	162.398	1.93402	137.557	21.2743	138.041	69.0205	857.015
GA03_St7_57m	57	St 7	9.21283	33.3079	5.16323	30.7769	6.47935	1.72108	32.1943	9.11159	11.0351	106.909	22.5765	8.40291	18.4257	5.97315	114.907	1.72108	87.5725	19.843	87.0663	50.7212	663.121
GA03_St7_72m	72	St 7	12.2329	172.9	9.20621	215.526	21.1869	3.78338	98.62	16.8991	75.2892	397.759	127.121	21.1869	43.5088	12.4851	295.986	5.17061	201.149	43.8872	171.765	208.59	2154.25
GA03_St7_151m	151	St 7	9.35059	43.3634	14.8441	181.402	17.9999	6.6623	19.1687	49.2075	33.1946	164.103	60.8957	70.597	60.3113	12.2727	131.843	8.41553	59.61	23.3765	63.8178	90.1163	1120.55
GA03_St7_201m	201	St 7	4.12377	0	0	1.9406	0	0	0	1.33416	1.09159	2.54704	0.849012	2.18317	0.849012	0	6.67081	0	1.33416	0	2.9109	2.30446	28.1387
GA03_St8_31m	31	St 8	13.5518	3.72541	3.40146	11.4462	3.02352	1.40378	7.12686	18.897	15.1716	19.005	4.91322	13.0659	22.7844	2.10566	58.8506	3.02352	40.5475	9.28652	39.6837	16.9533	307.967
GA03_St8_68m	68	St 8	12.3101	3.34643	3.34643	11.7125	2.98788	1.79273	8.84414	19.72	12.6686	19.9591	6.33431	10.0393	24.1421	2.62934	55.3356	4.30255	41.9499	10.0393	36.8107	17.5688	305.84
GA03_st8_111m	111	St 8	24.5445	2.50935	7.52804	6.9007	3.13668	2.35251	4.54819	2.7446	1.72518	6.82228	15.9971	67.3602	19.6827	6.19495	22.7409	5.9597	7.3712	4.39135	11.6057	14.5856	238.701
GA03_st8_135m	135	St 8	6.1662	0	1.66389	0	0	0	0	0	0	0	1.17451	37.8781	2.64266	2.64266	5.08956	0	1.17451	2.0554	1.17451	0	61.662
GA03_St8_186m	186	St 8	3.62405	0	0	0	0	0	0	0	0	0	0	22.0285	1.98967	1.56331	3.05557	0	0	1.63437	0	0	33.8955
Med_15	15	Med-Oct_2015	0	0	1.02465	0	0	0	5.63558	1.53698	0	2.0493	0	0	10.2465	0	6.14791	0	1.53698	24.0793	4.61093	0	58.9174
Med_30	30	Med-Oct_2015	0	0	0	6.68885	0	0	6.13145	3.90183	1.67221	6.68885	0	3.34443	7.80366	2.22962	12.8203	0	1.67221	27.8702	11.7055	1.67221	95.8736
Med_45	45	Med-Oct_2015	3.75782	0	1.87891	0	0	0	1.87891	1.87891	0.939456	0.939456	0	8.4551	0.939456	0	0.939456	0	0	6.57619	2.81837	0	31.002
Med_60	60	Med-Oct_2015	1.24621	0	0	0	0	0	0	0	0	0	0	31.7785	5.60796	0	4.98486	1.24621	0	7.47728	0	0	56.7027
Med_75	75	Med-Oct_2015	10.3228	0	4.65254	0	0	0	0	0	0	0	1.01774	7.70577	0.872351	2.18088	3.78019	2.03549	0	1.89009	0	0	37.3657
Med_90	90	Med-Oct_2015	13.6863	0	5.40248	0	0	0	0	0	0	0	0	6.48298	0	1.44066	8.28381	1.0805	0	1.44066	0.720331	0	40.3385
